# Supplementary material for: Signal transducer and activator of transcription 5 (STAT5) paralog dose governs T cell effector and regulatory functions
Source: eLife. 2016 Mar 21;5:e08384. doi: 10.7554/eLife.08384 (PMC4856466; doi:10.7554/eLife.08384)
Supplement: Supplementary file 1. — Spreadsheet reports QC-passing reads for all RNA-seq and ChIP-seq experiments. DOI: http://dx.doi.org/10.7554/eLife.08384.023 [file elife-08384-supp1.xlsx]

## Sheet: Sheet1
Sample Number	Assay	Genotype	Replicate Number	Cell Type	Culture Conditions	QC-passing Reads
1	RNA-seq	Wild Type (Stat5a+/+ Stat5b+/+)	1	Naïve CD4+ T cell	Ex Vivo	24066864
2	RNA-seq	STAT5A-deficient (Stat5a-/- Stat5b+/-)	1	Naïve CD4+ T cell	Ex Vivo	26069797
3	RNA-seq	STAT5B-deficient (Stat5a+/- Stat5b-/-)	1	Naïve CD4+ T cell	Ex Vivo	27182147
4	RNA-seq	Wild Type (Stat5a+/+ Stat5b+/+)	2	Naïve CD4+ T cell	Ex Vivo	25388520
5	RNA-seq	STAT5A-deficient (Stat5a-/- Stat5b+/-)	2	Naïve CD4+ T cell	Ex Vivo	31399022
6	RNA-seq	STAT5B-deficient (Stat5a+/- Stat5b-/-)	2	Naïve CD4+ T cell	Ex Vivo	44681498
7	RNA-seq	Wild Type (Stat5a+/+ Stat5b+/+)	3	Naïve CD4+ T cell	Ex Vivo	41895793
8	RNA-seq	STAT5A-deficient (Stat5a-/- Stat5b+/-)	3	Naïve CD4+ T cell	Ex Vivo	39480237
9	RNA-seq	STAT5B-deficient (Stat5a+/- Stat5b-/-)	3	Naïve CD4+ T cell	Ex Vivo	32690888
10	RNA-seq	Wild Type (Stat5a+/+ Stat5b+/+)	1	CD25+ Treg Cell	Ex Vivo	54697704
11	RNA-seq	STAT5A-deficient (Stat5a-/- Stat5b+/-)	1	CD25+ Treg Cell	Ex Vivo	15600902
12	RNA-seq	STAT5B-deficient (Stat5a+/- Stat5b-/-)	1	CD25+ Treg Cell	Ex Vivo	29958051
13	RNA-seq	Wild Type (Stat5a+/+ Stat5b+/+)	2	CD25+ Treg Cell	Ex Vivo	23010051
14	RNA-seq	STAT5A-deficient (Stat5a-/- Stat5b+/-)	2	CD25+ Treg Cell	Ex Vivo	23698267
15	RNA-seq	STAT5B-deficient (Stat5a+/- Stat5b-/-)	2	CD25+ Treg Cell	Ex Vivo	26544688
16	RNA-seq	Wild Type (Stat5a+/+ Stat5b+/+)	1	Naïve CD4+ T cell	IL-7 (18h)	99675526
17	RNA-seq	STAT5A-deficient (Stat5a-/- Stat5b+/-)	1	Naïve CD4+ T cell	IL-7 (18h)	30185808
18	RNA-seq	STAT5B-deficient (Stat5a+/- Stat5b-/-)	1	Naïve CD4+ T cell	IL-7 (18h)	41101471
19	RNA-seq	Wild Type (Stat5a+/+ Stat5b+/+)	2	Naïve CD4+ T cell	IL-7 (18h)	20290328
20	RNA-seq	STAT5A-deficient (Stat5a-/- Stat5b+/-)	2	Naïve CD4+ T cell	IL-7 (18h)	18505532
21	RNA-seq	STAT5B-deficient (Stat5a+/- Stat5b-/-)	2	Naïve CD4+ T cell	IL-7 (18h)	56423919
22	RNA-seq	Wild Type (Stat5a+/+ Stat5b+/+)	3	Naïve CD4+ T cell	IL-7 (18h)	32652313
23	RNA-seq	STAT5A-deficient (Stat5a-/- Stat5b+/-)	3	Naïve CD4+ T cell	IL-7 (18h)	31232296
24	RNA-seq	STAT5B-deficient (Stat5a+/- Stat5b-/-)	3	Naïve CD4+ T cell	IL-7 (18h)	35380128
25	RNA-seq	Wild Type (Stat5a+/+ Stat5b+/+)	1	Effector CD4+ T cell	IL-2 (72h)	37874829
26	RNA-seq	STAT5A-deficient (Stat5a-/- Stat5b+/-)	1	Effector CD4+ T cell	IL-2 (72h)	39858066
27	RNA-seq	STAT5B-deficient (Stat5a+/- Stat5b-/-)	1	Effector CD4+ T cell	IL-2 (72h)	30846258
28	RNA-seq	Wild Type (Stat5a+/+ Stat5b+/+)	2	Effector CD4+ T cell	IL-2 (72h)	22275698
29	RNA-seq	STAT5A-deficient (Stat5a-/- Stat5b+/-)	2	Effector CD4+ T cell	IL-2 (72h)	36794842
30	RNA-seq	STAT5B-deficient (Stat5a+/- Stat5b-/-)	2	Effector CD4+ T cell	IL-2 (72h)	31900610
31	RNA-seq	STAT5B-deficient (Stat5a+/- Stat5b-/-)	1	Effector CD4+ T cell	Control-RV + IL-2 (24h)	38931247
32	RNA-seq	STAT5B-deficient (Stat5a+/- Stat5b-/-)	1	Effector CD4+ T cell	STAT5A-RV + IL-2 (24h)	39674841
33	RNA-seq	STAT5B-deficient (Stat5a+/- Stat5b-/-)	2	Effector CD4+ T cell	Control-RV + IL-2 (24h)	33435493
34	RNA-seq	STAT5B-deficient (Stat5a+/- Stat5b-/-)	2	Effector CD4+ T cell	STAT5A-RV + IL-2 (24h)	42177839
35	RNA-seq	Wild Type (Stat5a+/+ Stat5b+/+)	1	iTreg	TGF-b + IL-2 (72h)	33307294
36	RNA-seq	STAT5A-deficient (Stat5a-/- Stat5b+/-)	1	iTreg	TGF-b + IL-2 (72h)	19607094
37	RNA-seq	STAT5B-deficient (Stat5a+/- Stat5b-/-)	1	iTreg	TGF-b + IL-2 (72h)	19604804
38	RNA-seq	Wild Type (Stat5a+/+ Stat5b+/+)	2	iTreg	TGF-b + IL-2 (72h)	33323545
39	RNA-seq	STAT5A-deficient (Stat5a-/- Stat5b+/-)	2	iTreg	TGF-b + IL-2 (72h)	39979942
40	RNA-seq	STAT5B-deficient (Stat5a+/- Stat5b-/-)	2	iTreg	TGF-b + IL-2 (72h)	21306474
41	ChIP-seq	Wild Type (Stat5a+/+ Stat5b+/+)	1	Effector CD4+ T cell	IL-2 (48h)	42875015
42	ChIP-seq	STAT5-AB (Stat5a+/- Stat5b+/-)	1	Effector CD4+ T cell	IL-2 (48h)	43597407
43	ChIP-seq	STAT5A-deficient (Stat5a-/- Stat5b+/-)	1	Effector CD4+ T cell	IL-2 (48h)	43726481
44	ChIP-seq	STAT5B-deficient (Stat5a+/- Stat5b-/-)	1	Effector CD4+ T cell	IL-2 (48h)	48934131
45	ChIP-seq	Wild Type (Stat5a+/+ Stat5b+/+)	2	Effector CD4+ T cell	IL-2 (48h)	46501179
46	ChIP-seq	STAT5-AB (Stat5a+/- Stat5b+/-)	2	Effector CD4+ T cell	IL-2 (48h)	41481320
47	ChIP-seq	STAT5A-deficient (Stat5a-/- Stat5b+/-)	2	Effector CD4+ T cell	IL-2 (48h)	44689651
48	ChIP-seq	STAT5B-deficient (Stat5a+/- Stat5b-/-)	2	Effector CD4+ T cell	IL-2 (48h)	43708221
