# Supplementary material for: Signal transducer and activator of transcription 5 (STAT5) paralog dose governs T cell effector and regulatory functions
Source: eLife. 2016 Mar 21;5:e08384. doi: 10.7554/eLife.08384 (PMC4856466; doi:10.7554/eLife.08384)
Supplement: Supplementary file 3. — Spreadsheet includes paralog preference calculations for all relevant cell types and experimental conditions. DOI: http://dx.doi.org/10.7554/eLife.08384.025 [file elife-08384-supp3.xlsx]

## Sheet: Naive CD4 T Cells
Cell Type	Naïve CD4+ CD44low CD25- cells
Culture Conditions	Ex vivo
Mouse Gene Symbol	Wild Type: Stat5a+/+ Stat5b+/+ (RPKM Replicate 1)	STAT5A-deficient: Stat5a-/- Stat5b+/- (RPKM Replicate 1)	STAT5B-deficient: Stat5a+/- Stat5b-/- (RPKM Replicate 1)	Wild Type: Stat5a+/+ Stat5b+/+ (RPKM Replicate 2)	STAT5A-deficient: Stat5a-/- Stat5b+/- (RPKM Replicate 2)	STAT5B-deficient: Stat5a+/- Stat5b-/- (RPKM Replicate 2)	Wild Type: Stat5a+/+ Stat5b+/+ (RPKM Replicate 3)	STAT5A-deficient: Stat5a-/- Stat5b+/- (RPKM Replicate 3)	STAT5B-deficient: Stat5a+/- Stat5b-/- (RPKM Replicate 3)	Log2 Fold Change (STAT5A-deficient ÷ WT)	p Value (STAT5A-deficient vs WT)	Log2 Fold Change (STAT5B-deficient ÷ WT)	p Value (STAT5B-deficient vs WT)	Log2 Fold Change (STAT5B-deficient ÷ STAT5A-deficient)	p Value (STAT5B-deficient vs STAT5A-deficient)	Paralog Preference Rank
1700097N02Rik	9.52111	18.7209	14.651	9.70999	12.7872	12.7498	13.0296	20.6888	12.7446	0.677635	0.036694	0.288814	0.401556	-0.388821	0.207173	-0.759189
2610507I01Rik	9.81376	4.27225	7.49181	9.79898	6.60112	7.29689	8.16093	3.78253	4.29921	-0.896511	0.0483833	-0.655295	0.13169	0.241216	0.632609	-0.241216
2700069I18Rik	0.370035	3.57758	3.20984	0.453389	1.56741	1.50821	0.70117	1.51584	0.375834	2.80513	0.0131854	2.12565	0.092176	-0.679477	0.392057	-1.35755
2810021J22Rik	3.83008	9.39346	5.81003	3.5948	5.5185	5.83079	2.98564	7.79502	8.18059	1.04973	0.0405644	0.829942	0.117418	-0.219788	0.620799	-0.421422
4930470H14Rik	17.6846	44.3191	33.7176	16.366	29.1425	11.2464	26.0553	32.3198	22.1901	0.802238	0.000933767	0.136073	0.611305	-0.666165	0.00482969	-1.31432
4930481A15Rik	1.68764	0.26723	0.342163	4.37664	0.260379	0.255117	0.927703	0.335494	2.05811	-5.43481	0.00186037	-1.74757	0.0831222	3.68723	0.0977274	-3.68723
5830417I10Rik	12.3587	5.43489	5.67557	12.6321	8.43943	5.6032	8.73877	5.36875	5.36656	-0.914658	0.0276362	-1.01563	0.0158012	-0.100969	0.836623	0.100969
6030458C11Rik	11.5826	16.7638	18.9524	16.438	16.625	22.9857	13.0428	18.8036	21.7161	0.365808	0.235422	0.617328	0.0366051	0.25152	0.366136	0.5236
8430419L09Rik	9.7692	20.2252	13.4764	9.25325	19.4078	18.956	14.586	14.56	14.2898	0.661169	0.0392488	0.411071	0.216859	-0.250098	0.402677	-0.481424
9030025P20Rik	4.36049	9.27315	7.24978	3.74026	8.64155	4.40009	3.83032	7.51689	3.82515	1.1015	0.0238808	0.295385	0.595174	-0.806111	0.0810684	-1.59966
A930015D03Rik	13.2413	25.4393	24.1374	8.95016	17.6539	21.6305	16.3058	20.6084	13.0101	0.74615	0.0130437	0.60989	0.0464304	-0.136259	0.615804	-0.253616
AA465934	8.27364	32.1753	10.8398	9.21763	41.5564	10.4402	9.83123	39.259	11.1363	2.05498	7.30722e-13	0.220783	0.563913	-1.8342	2.66487e-11	-3.65437
Abhd14b	3.21664	0.263711	0.324223	2.45557	0.387963	0.3954	2.0504	1.53263	0.807277	-1.72933	0.0867209	-2.63974	0.0235102	-0.910404	0.552505	0.910404
Acvrl1	12.2353	4.4128	4.61196	11.2652	5.61815	12.6966	12.5182	0.628343	6.86403	-1.69911	0.000225452	-0.546203	0.149398	1.15291	0.0218097	-1.15291
Adk	7.65594	8.56974	9.16026	7.38841	12.2162	13.6411	5.39663	9.17678	12.8757	0.577639	0.166183	0.819714	0.0403075	0.242075	0.504842	0.505109
AF357399	193.078	116.353	28.5917	147.317	96.3096	201.57	131.203	39.7191	76.3034	-0.905228	3.30353e-11	-0.641011	1.1774e-06	0.264217	0.070604	-0.264217
Akr1b3	10.2155	17.3952	10.8051	9.06776	16.7926	9.04986	10.9711	21.6165	13.5031	0.893501	0.00637119	0.156517	0.670515	-0.736984	0.0204462	-1.45688
Akr1c12	7.22562	2.61556	0.970551	9.04788	3.50271	1.66574	5.00265	4.17235	1.51859	-0.925862	0.0770977	-2.05692	0.00110346	-1.13105	0.124457	1.13105
Arhgap27os3	13.1131	21.1201	28.4143	11.3505	17.7885	27.5292	5.89159	14.5345	26.9868	0.841341	0.0108544	1.44044	1.52615e-06	0.599102	0.0219333	1.21925
Arhgap31	3.40034	7.42285	1.37117	3.73859	7.64602	1.3563	8.02909	1.21618	1.70419	0.0883998	0.864733	-1.88655	0.00877874	-1.97495	0.00533679	1.70504
Arl2bp	42.7152	35.6474	41.1827	36.9756	38.8441	9.22502	40.9142	33.1596	24.9343	-0.167337	0.418004	-0.711066	0.0014731	-0.543728	0.0176426	0.543728
Arl5c	40.502	26.2125	33.9573	47.2924	28.3589	35.0477	40.3432	24.2302	35.0281	-0.716745	0.00107122	-0.321976	0.11774	0.394769	0.0848282	-0.394769
Arrdc4	0.780791	1.7402	2.08003	0.477446	1.16549	4.03992	0.974963	1.40142	1.74242	0.940504	0.412392	1.89219	0.0533488	0.951687	0.255402	1.95169
Arsb	11.8228	0.905956	0.981211	8.42489	3.51533	0.888306	4.63926	0.799631	1.73391	-2.03235	0.000456717	-2.61681	3.87858e-05	-0.584465	0.513434	0.584465
Atg14	8.96644	17.4821	9.43696	5.18036	12.2816	12.4498	9.91875	11.7636	14.0993	0.765083	0.0392822	0.517911	0.178873	-0.247171	0.466582	-0.47544
Atn1	51.2605	49.1726	30.7096	50.2291	63.7783	28.8143	51.1289	56.6796	18.0205	0.157569	0.380116	-0.98339	3.27269e-06	-1.14096	3.33386e-08	0.664358
Atp6v1d	41.0823	25.3034	59.5737	42.3733	29.1202	41.5259	49.1547	28.7176	48.8193	-0.671988	0.00175321	0.171062	0.366012	0.84305	5.44974e-05	-0.306915
Atp9a	3.68118	3.32343	8.40175	3.43746	2.59163	6.65823	2.57978	1.87015	9.14848	-0.319369	0.63579	1.22637	0.0181959	1.54574	0.00475976	2.17003
AW112010	70.3666	96.996	121.543	74.3906	117.062	144.904	51.8958	55.7924	63.2416	0.457673	0.00345805	0.731053	1.33371e-06	0.27338	0.0552442	0.562887
Bambi-ps1	20.118	15.6204	28.1648	25.3881	14.7671	23.29	32.9669	17.4454	25.2375	-0.70222	0.0099047	-0.0605901	0.804949	0.64163	0.0191651	-0.64163
Bbc3	18.2029	29.8398	13.1896	12.1466	10.2208	16.6816	15.8807	31.5141	25.6223	0.641946	0.0218477	0.259221	0.381867	-0.382725	0.152593	-0.745295
Bcl3	12.5904	10.8326	19.8214	11.9143	17.0661	19.7269	9.15792	16.4115	27.3905	0.367051	0.275052	0.952038	0.00182272	0.584987	0.0419015	1.19164
Bcl9l	32.7948	27.6141	23.1763	34.9116	32.8774	21.2611	30.3117	26.4314	19.1243	-0.174909	0.439965	-0.658676	0.00678005	-0.483768	0.0527386	0.483768
Ccdc69	15.9141	26.0357	12.5636	14.9837	23.3722	14.5961	13.6297	25.6301	13.6065	0.731681	0.00868312	-0.122073	0.701404	-0.853754	0.00257167	-1.34657
Ccl5	1.17648	4.98333	5.70656	1.59024	4.16326	44.9404	1.48859	7.77162	24.8121	2.03973	0.00354044	4.1687	6.81151e-18	2.12897	1.0761e-09	4.28943
Cd274	11.4658	17.0887	20.4162	11.9075	16.7892	18.092	7.91233	12.0516	13.9367	0.563535	0.0975603	0.72067	0.0293117	0.157135	0.602254	0.334013
Cd81	13.1215	15.8152	19.4236	7.60532	9.8896	15.266	11.6043	15.16	19.8016	0.308555	0.370112	0.684633	0.0340633	0.376079	0.220593	0.773414
Cdk5rap1	6.30116	14.7368	22.3566	7.45546	12.3265	26.3849	23.5083	27.8158	24.7628	0.566195	0.0705526	0.9534	0.00116705	0.387205	0.14837	0.79567
Chordc1	58.1353	51.1973	38.4868	44.9771	34.4444	39.6522	126.591	80.8193	52.2435	-0.474609	0.00434906	-0.848394	1.20718e-06	-0.373786	0.0447135	0.373786
Clybl	4.01763	4.11225	2.52151	3.81361	1.02697	1.14265	7.09049	1.2774	0.90345	-1.30184	0.0470161	-1.57609	0.0211372	-0.274255	0.746785	0.274255
Cmtm7	15.1269	5.07822	5.30051	15.3833	6.12933	5.17253	13.7162	12.7649	5.6037	-0.873104	0.0167731	-1.4728	0.000245877	-0.599698	0.195994	0.599698
Cpne8	130.677	279.556	204.084	255.288	141.162	201.731	137.929	403.948	183.362	0.657115	6.32198e-09	0.14791	0.209403	-0.509205	4.82853e-06	-0.995331
Crip1	209.312	365.79	299.532	117.673	326.427	146.894	200.338	305.259	287.176	0.91528	1.50456e-16	0.454339	7.32112e-05	-0.460941	1.43912e-05	-0.902755
Ctla4	2.81175	5.51465	4.37856	3.271	4.96549	8.53793	1.61497	3.90326	4.92687	0.889875	0.146169	1.13076	0.0538643	0.240882	0.633076	0.503917
Ctse	73.4106	74.5823	17.0498	70.4954	137.887	147.134	69.1764	132.767	13.3444	0.702233	2.02438e-06	-0.282792	0.0901428	-0.985025	1.17511e-10	-1.12615
Cxcr5	1.36655	2.56207	4.57427	1.53831	2.11893	5.10258	1.00975	1.90669	4.02801	0.779311	0.366662	1.74311	0.0174317	0.963802	0.133717	1.9638
Daf2	27.6223	24.7312	17.4193	25.5879	24.335	17.0738	18.3496	15.278	14.4834	-0.172734	0.505807	-0.605746	0.0288413	-0.433012	0.128211	0.433012
Dapl1	182.964	77.3187	23.7915	193.879	126.813	39.4959	119.235	70.3047	37.1901	-0.859142	1.22921e-10	-2.33035	3.86394e-47	-1.47121	1.79728e-16	1.47121
Ddit4	166.526	269.536	137.79	47.8768	50.1064	131.02	116.176	208.648	180.296	0.676853	1.28019e-07	0.414986	0.00156554	-0.261867	0.0321351	-0.498419
Dennd2d	61.9879	102.334	102.212	85.4878	83.1508	108.344	67.3937	105.534	139.2	0.4407	0.00372803	0.681245	3.78655e-06	0.240545	0.0845955	0.502753
Dnah8	19.7008	82.0137	73.0194	19.3352	41.4941	23.4107	51.8608	80.8292	21.9669	1.15999	1.77649e-09	0.35243	0.102049	-0.807556	9.5683e-06	-1.59734
Dnaja4	7.55434	4.52747	4.26149	4.74322	4.13911	5.83006	16.7776	5.01056	5.20143	-1.09424	0.0159894	-1.01537	0.0229903	0.0788692	0.882961	-0.0788692
Dnajb4	8.40407	6.81294	6.73382	10.7802	8.69814	7.2909	23.3327	8.11535	8.71847	-0.807061	0.0287541	-0.887591	0.0172301	-0.0805301	0.849862	0.0805301
Dok2	29.2372	110.552	61.7309	75.9238	80.16	69.4021	33.9167	88.1171	141.485	1.00229	1.73413e-09	0.942512	1.75796e-08	-0.0597803	0.683361	-0.0964388
Dusp10	30.1985	44.8656	47.7443	26.9345	31.0898	56.4421	25.078	30.7817	43.5052	0.380218	0.0912708	0.827983	8.27209e-05	0.447766	0.0241406	0.915752
Eci1	15.9433	8.20255	8.17124	13.6913	9.08903	11.6587	11.8206	6.37251	9.1536	-0.867409	0.0199782	-0.554623	0.115958	0.312786	0.441969	-0.312786
Eif2ak2	6.6336	3.50294	2.65635	5.73724	4.92746	2.74262	5.26664	7.47382	2.30617	-0.171514	0.729928	-1.17602	0.0447216	-1.0045	0.0955563	1.0045
Eml2	7.99534	14.8963	11.0096	8.59706	15.242	13.5503	6.72921	13.3625	11.7009	0.833596	0.0231502	0.598121	0.115771	-0.235475	0.477371	-0.452286
Eomes	1.44789	1.10105	4.2832	1.28789	1.59554	11.6703	1.28706	1.14215	5.26674	0.392765	0.70804	2.71827	0.000128705	2.3255	0.00047029	4.71782
Epas1	3.36805	3.11525	1.41038	3.80018	2.52741	1.1839	2.82205	2.19186	0.752821	-0.319364	0.635796	-1.70492	0.0441557	-1.38556	0.120776	1.38556
Eps8l1	1.01248	0.232369	0.249157	25.3617	0.530972	0.291964	4.44135	0.302496	4.13526	-4.6962	6.88387e-09	-2.87819	2.21326e-06	1.81802	0.170368	-1.81802
F2rl1	32.6734	8.20082	8.39888	29.7936	21.7647	6.54396	17.3137	6.6385	8.6785	-1.11245	0.000109174	-1.75241	3.52092e-08	-0.639962	0.0922454	0.639962
Fbxo17	5.97731	25.4431	15.8449	5.83316	36.9481	32.7564	3.50628	30.3957	16.9918	2.5077	1.30896e-13	2.01026	3.93504e-08	-0.497442	0.0415812	-0.976609
Folr4	48.9546	44.7554	79.1554	62.4712	63.9728	92.1691	44.0869	54.7272	94.4011	0.0779651	0.665097	0.750035	5.07997e-06	0.67207	3.57457e-05	1.36437
Fos	75.3672	39.1407	36.6759	191.532	211.393	120.384	143.516	125.669	113.664	-0.135124	0.299646	-0.62655	5.23359e-06	-0.491425	0.000426851	0.491425
Fosb	5.99862	2.19519	1.20199	21.467	24.5373	8.29582	14.2414	15.1743	11.1232	0.0306692	0.924896	-1.05289	0.00656923	-1.08356	0.00491138	0.987456
Fsd2	2.10986	0.979659	0.274485	1.6158	2.02782	0.265592	1.79768	1.02403	1.07339	-0.568988	0.524842	-2.42291	0.0448742	-1.85392	0.161347	1.85392
Galnt10	29.1356	19.7653	19.6081	45.6084	25.4088	23.3995	43.2122	26.3068	26.3932	-0.735141	0.00123856	-0.796102	0.0005081	-0.0609618	0.811806	0.0609618
Gbp10	39.716	62.4942	70.49	42.5443	58.1087	77.3434	30.4261	55.5529	60.105	0.6356	0.000798077	0.850286	3.66398e-06	0.214687	0.200862	0.448742
Gbp2	33.1397	66.057	85.8608	33.9374	58.2018	72.4741	32.8477	52.0885	56.2133	0.811206	3.03849e-05	1.07469	9.52908e-09	0.263488	0.114162	0.545523
Gbp2b	10.441	34.5943	44.0126	10.3473	16.5109	0.971661	9.59052	26.6776	20.2041	1.38915	4.48299e-06	1.08947	0.000580137	-0.299684	0.236878	-0.581097
Gbp4	48.9937	82.7055	100.869	53.3472	87.9427	120.106	37.6153	73.6982	73.2678	0.803424	2.35248e-06	1.04814	1.98536e-10	0.244719	0.0981655	0.507753
Gbp5	7.28494	12.9483	16.3568	7.84939	11.7924	13.6956	5.82168	9.85373	9.38712	0.729129	0.0667107	0.865384	0.0256366	0.136256	0.691645	0.292375
Gbp7	25.9754	46.8212	49.6171	23.487	32.6185	32.4324	21.3757	35.6686	28.3527	0.724406	0.00157313	0.62906	0.00666393	-0.0953461	0.64611	-0.171967
Gimap7	43.1775	74.8174	33.3014	31.3887	52.1636	50.6463	49.5084	64.4399	68.9087	0.619274	0.000710836	0.277788	0.146265	-0.341486	0.0513126	-0.661527
Glo1	19.4142	49.0836	40.3023	18.6812	32.327	19.6234	36.3905	49.3135	18.9607	0.808158	0.000254883	0.071539	0.77132	-0.736619	0.000717131	-1.45521
Gm11127	34.6563	120.542	121.85	35.7152	95.096	91.0384	70.5762	119.35	37.4321	1.23346	1.56213e-14	0.794512	2.62765e-06	-0.438944	0.00233247	-0.861177
Gm12250	10.1198	28.2518	31.4211	7.4881	19.259	31.8462	10.0172	17.9326	16.711	1.25903	0.000104244	1.53888	6.69842e-07	0.279854	0.26811	0.579415
Gm14085	21.1748	14.0125	23.8908	35.0199	18.3243	40.2743	35.9697	14.6062	14.5388	-0.97027	0.000234082	-0.242134	0.301898	0.728136	0.0076253	-0.728136
Gm19705	7.79188	10.2845	13.5184	7.72778	8.34722	13.9023	4.26626	6.68817	11.7191	0.31639	0.467653	0.971425	0.0127424	0.655035	0.076506	1.33311
Gm19757	8.52927	17.4662	12.1517	13.3169	10.0755	14.839	8.99773	21.6759	11.2547	0.654863	0.0507323	0.269554	0.448523	-0.385309	0.227818	-0.752091
Gm4951	1.5358	3.31778	4.79724	1.25873	2.46279	4.35801	1.28969	1.67632	2.59218	0.779306	0.366665	1.52362	0.0451508	0.744315	0.264221	1.52192
Gm5779	70.4356	107.386	11.9955	71.2327	69.1759	64.7993	20.2461	103.148	74.8716	0.792121	9.58914e-07	-0.106885	0.555884	-0.899007	3.80452e-08	-1.47844
Gm590	7.7075	3.47316	13.2917	6.25299	7.15932	15.9971	7.0207	4.64047	13.5604	-0.484374	0.319263	1.00519	0.00800075	1.48956	0.000285864	1.55476
Gm7367	32.1198	53.6801	48.2426	43.1301	65.0606	64.7457	37.9026	39.8651	62.4924	0.488049	0.0116324	0.606763	0.00138848	0.118714	0.502179	0.257042
Gm8909	188.917	419.966	432.58	132.155	354.215	307.35	273.707	439.456	117.606	1.02265	1.37731e-21	0.509912	4.15138e-06	-0.512739	5.72892e-07	-1.01227
Golm1	16.4646	13.5997	7.68327	15.1065	12.0235	6.71135	12.169	9.93852	4.66352	-0.258496	0.438374	-1.12052	0.00344417	-0.862028	0.0309305	0.862028
Gpr34	1.5602	0.70269	0.278314	2.56765	1.69164	0.35469	0.868933	1.17597	0.458315	-0.568921	0.52489	-5.21798	0.00378186	-4.64906	0.0180907	4.64906
Gpr83	4.21646	5.62038	5.55287	2.89328	3.49941	5.29127	3.83035	6.93935	11.8706	0.53067	0.342366	1.02973	0.0446198	0.499058	0.286984	1.02262
Guca1b	3.3655	0.259579	1.37538	3.34812	1.31303	0.248095	1.10924	0.26938	3.44099	-2.62281	0.02465	-0.804687	0.350951	1.81813	0.170342	-1.81813
Gzmk	0.232369	1.18084	0.828008	0.232369	0.456584	4.50029	0.363361	0.739193	1.71176	3.70553	0.096351	5.60076	0.000953981	1.89522	0.0529221	3.89522
H2-Ea-ps	0.232369	8.14445	7.15508	0.232369	1.31395	2.69773	1.69568	3.13342	0.232369	2.48671	0.00514878	2.20848	0.0174634	-0.278234	0.649482	-0.541269
H2-K1	1748.49	738.443	782.074	1747.73	1418.93	1355.43	1279.99	776.115	1889.76	-0.709619	3.59501e-16	-0.274871	0.00134777	0.434748	6.49406e-07	-0.434748
H2-M2	0.592044	10.9221	11.2288	0.585141	6.87619	5.99891	6.01546	12.4687	0.673572	1.88191	0.000286844	1.13109	0.0537937	-0.750828	0.0791391	-1.48779
H2-Q10	28.6027	123.228	132.475	28.9981	92.0279	80.0998	81.2412	154.109	29.3499	1.40373	8.91346e-19	0.772576	6.24319e-06	-0.631155	9.95214e-06	-1.24574
H2-T10	55.8032	100.474	103.677	49.9958	68.2427	97.0165	65.1253	88.0017	76.5754	0.578708	0.000361436	0.678262	2.21741e-05	0.0995544	0.501861	0.218495
H2-T3	1.97361	8.46565	9.53601	2.06526	5.85311	5.9946	4.29565	6.98552	2.0565	1.37073	0.0152825	1.13111	0.053789	-0.239619	0.606755	-0.462011
H60b	1.47225	12.9244	7.10896	1.52929	6.2772	1.06454	6.65958	8.37453	5.26303	1.41468	0.00506286	0.350219	0.559956	-1.06446	0.0246721	-2.11891
Hba-a2	0.824592	20.3171	33.391	10.5726	13.0429	13.469	3.62061	21.6319	142.642	1.76795	3.58715e-06	3.52121	2.69396e-34	1.75325	1.07522e-15	3.53413
Hbb-b2	3.38248	9.96995	19.1145	5.79996	8.43148	19.9663	2.38081	13.8769	111.932	1.52342	0.00130361	3.73207	8.9577e-30	2.20865	1.44869e-17	4.44706
Hbb-bs	4.38929	18.227	26.3545	9.32634	10.6885	27.6484	3.77363	18.5116	168.328	1.48558	0.000130077	3.66549	1.37371e-40	2.17991	1.7468e-23	4.38937
Hectd2	1.48004	0.232448	1.42662	1.48806	0.232887	1.68082	2.03054	0.232702	1.42808	-4.65238	0.0185616	-0.0221487	0.982012	4.63023	0.0192489	-4.63023
Hid1	18.4677	12.8019	11.4208	18.16	13.5338	10.5107	21.7	17.2579	9.16938	-0.400696	0.177389	-0.923169	0.00417295	-0.522472	0.128346	0.522472
Hist1h4m	6.9615	6.54948	4.87176	11.574	4.74691	4.82782	6.84362	5.59461	4.12846	-0.52962	0.231393	-0.907863	0.0532643	-0.378243	0.460785	0.378243
Hist2h2bb	2.67407	7.26203	8.98469	2.32746	2.6273	10.031	2.54212	10.0753	10.9476	1.30116	0.022856	1.86226	0.000334993	0.561099	0.178708	1.14606
Hopx	4.96909	2.69307	1.212	4.75792	2.83591	3.17099	4.95728	1.94446	1.52671	-0.896495	0.143143	-1.32094	0.0437373	-0.42445	0.576881	0.42445
Hspa1b	45.1441	24.869	43.6753	76.8256	35.3848	7.18099	240.937	88.5326	23.0224	-1.29101	1.87942e-16	-2.31877	1.43097e-37	-1.02776	1.6923e-06	1.02776
Hspa1l	3.6069	2.44249	4.01951	5.90433	3.13682	1.64336	16.6793	6.46328	3.06251	-1.28647	0.00910822	-1.59053	0.00209591	-0.304062	0.635192	0.304062
Hsph1	51.8005	49.4499	29.5559	36.7404	28.7932	26.4347	261.027	98.5649	41.5963	-0.990699	8.51768e-11	-1.86449	1.8607e-27	-0.873794	7.47886e-06	0.873794
Id3	28.1436	22.2511	33.5364	46.2579	27.1195	29.2806	48.5306	31.629	60.4391	-0.605375	0.00573514	-0.0245442	0.902492	0.580831	0.00805151	-0.580831
Ifi30	19.6769	9.39769	14.438	16.9394	15.6108	10.4124	14.3567	13.8481	8.01438	-0.388933	0.216477	-0.692072	0.0357019	-0.30314	0.387498	0.30314
Igf2bp3	0.455928	0.578522	0.664454	0.446725	0.526728	0.782537	0.498847	0.63127	3.61705	4.25311	0.0417574	5.19548	0.00420146	0.942374	0.32418	1.94237
Igfbp4	379.506	221.471	111.503	320.306	249.167	109.328	263.157	236.876	113.552	-0.448035	2.87384e-05	-1.54451	1.56357e-38	-1.09647	5.38261e-19	1.09647
Igtp	92.746	155.087	221.403	84.2175	160.551	231.398	101.227	124.166	134.303	0.657703	1.22046e-06	1.05464	5.33619e-16	0.396937	0.00102708	0.810334
Iigp1	13.2618	42.0011	55.9518	8.18759	30.8232	54.5956	9.81147	15.6785	28.3941	1.513	2.32117e-07	2.13713	8.15877e-16	0.624135	0.00286257	1.26734
Ikzf3	28.6957	45.8079	45.894	31.6325	47.709	59.3349	31.9798	49.8882	63.7746	0.626484	0.00232958	0.836813	2.66484e-05	0.210329	0.247119	0.441283
Inppl1	0.939364	4.30334	5.56651	0.773076	5.19739	6.96624	0.925805	4.08147	3.80821	2.05284	0.00997666	2.41627	0.00122548	0.363422	0.492349	0.750445
Insl3	14.4942	22.6624	25.5466	17.5778	19.1341	31.416	8.75885	18.0452	34.6283	0.544485	0.0692177	1.13972	2.84351e-05	0.595235	0.0170547	1.21191
Insl6	6.71256	10.0165	13.9721	4.747	10.0624	12.7538	6.2568	10.5107	7.78655	0.775424	0.0677546	0.930362	0.0241587	0.154938	0.669141	0.330025
Irf8	2.51917	3.74064	5.76633	2.74089	5.39692	6.53469	2.1411	4.46719	5.60496	0.685818	0.279064	1.20811	0.0369328	0.522292	0.310973	1.06978
Irgm1	45.6327	75.4759	81.9922	44.5221	69.2824	88.5076	49.9136	61.8419	59.3175	0.542841	0.00199043	0.683142	7.12991e-05	0.140301	0.379507	0.29929
Irgm2	26.5701	44.166	60.4688	22.298	36.9939	52.3627	25.5938	31.4307	31.4924	0.574028	0.0115906	0.907846	2.64221e-05	0.333818	0.0918804	0.686334
Itm2a	49.7731	48.8559	81.797	56.0055	43.879	81.1051	54.9799	66.7113	157.129	-0.011812	0.947567	0.964585	1.00171e-09	0.976397	6.54894e-10	1.94378
Jak3	27.7957	33.447	41.6902	30.812	40.1829	52.8335	20.8919	30.9564	56.7963	0.374493	0.10014	0.901332	1.82489e-05	0.52684	0.00801554	1.07433
Jun	56.7868	37.3444	34.7908	137.64	143.807	81.5678	165.212	110.255	94.9965	-0.313835	0.0237183	-0.790658	7.21587e-08	-0.476823	0.00173064	0.476823
Kcnf1	0.38628	1.04039	2.39672	0.408453	1.50477	6.22306	0.349964	2.4955	5.84069	4.95947	0.00861629	6.39516	1.28208e-05	1.43569	0.0391029	2.92111
Khdrbs3	0.310708	5.49198	4.70225	1.28397	1.46179	3.54482	1.57007	7.9639	5.1355	2.1587	0.00581265	2.13901	0.0063133	-0.0196845	0.971172	-0.0196845
Klrd1	6.09518	2.88006	2.46617	9.31788	3.81711	1.83218	4.69243	2.2786	3.54371	-1.14086	0.0401236	-1.32682	0.020205	-0.185959	0.787931	0.185959
Lag3	0.866958	2.16648	2.66869	0.965232	1.48858	5.33465	0.691809	2.64223	3.2651	0.95855	0.315925	1.79582	0.0304124	0.837267	0.235573	1.71174
Lars2	25.3976	21.4777	49.1708	28.0953	78.2182	31.0486	166.368	104.439	59.8311	-0.117448	0.467233	-0.672892	0.000107624	-0.555444	0.00162952	0.555444
Ly6c2	94.1307	11.5	100.389	60.6527	98.7416	113.338	29.0544	4.09647	50.3621	-0.695197	0.000209353	0.49558	0.00185275	1.19078	1.08705e-11	0.315739
Ly6k	4.88308	1.07249	2.07895	3.63762	1.97013	2.90291	9.79821	4.2319	4.20722	-1.42284	0.0172109	-1.08717	0.0532291	0.335675	0.638097	-0.335675
Lypd6b	8.66762	5.82208	7.31985	12.0263	2.5448	8.70719	10.0162	2.06805	9.96382	-1.48416	0.00187503	-0.275285	0.478999	1.20888	0.0152025	-1.20888
Map7	7.85775	0.612335	3.92525	5.84646	2.82979	6.86245	3.38951	0.394884	4.79526	-2.0461	0.00342951	-0.109268	0.828229	1.93683	0.00637446	-1.93683
Mid1	5.10248	3.11482	19.2936	5.87009	4.86575	0.232707	1.21253	3.44083	6.16794	-0.126955	0.83203	1.02666	0.0370426	1.15361	0.0217277	1.9586
Mnd1	0.232369	5.70235	0.290451	0.292617	0.355353	0.301095	0.366489	3.60878	0.258335	5.93633	0.000207154	0	1	-5.93633	0.00019036	-7.8108
Mnda	17.9626	31.8369	5.71642	19.0565	31.9814	30.7718	16.9662	32.9028	20.9252	0.839813	0.000883789	0.0791624	0.779976	-0.760651	0.00219905	-1.50258
Mrps12	29.3594	21.063	24.5542	33.3663	18.7034	17.8355	41.8461	26.8728	26.5462	-0.636621	0.00720723	-0.593502	0.0113975	0.0431192	0.867556	-0.0431192
Ms4a6d	13.6868	26.9377	28.049	17.9599	29.8173	24.9197	12.0797	22.9719	9.52014	0.856671	0.00192737	0.494354	0.0899951	-0.362317	0.154449	-0.706966
Msh5	0.232371	2.95095	2.55322	0.89821	1.71746	1.53786	1.30533	2.88049	0.232391	1.9115	0.0508352	1.23201	0.258921	-0.679487	0.39205	-1.35756
Nars2	2.84067	6.25663	7.70648	2.91518	4.46494	8.2657	3.27633	9.37258	8.8456	1.06105	0.0593774	1.43423	0.00653509	0.373184	0.39744	0.769112
Ngrn	10.4191	14.5814	18.9859	8.26011	6.5875	15.725	10.3208	13.8377	12.3817	0.357604	0.332412	0.72119	0.0375388	0.363586	0.265879	0.74825
Nkg7	0.377211	1.34437	1.44647	0.431218	1.15242	4.01288	0.44316	1.56696	2.06069	4.64914	0.0187604	5.41235	0.00199331	0.763217	0.376657	1.57057
Nsg2	72.8249	26.1387	81.7282	71.4241	19.7919	94.382	128.096	26.727	46.8202	-1.90011	3.06255e-23	-0.309609	0.0424375	1.5905	1.24013e-15	-1.5905
P2rx7	2.38665	14.0739	7.57429	3.3592	12.1557	11.4646	6.29623	13.8978	15.8592	1.84349	4.0856e-05	1.63164	0.000438751	-0.211853	0.53498	-0.404498
Padi2	9.54081	9.75536	2.25606	8.09957	6.57684	4.77662	7.76299	3.02179	4.80125	-0.379136	0.379657	-1.1277	0.0206531	-0.748564	0.149061	0.748564
Pdcd1	2.4555	4.87147	6.09452	2.2437	4.6054	8.46271	2.04715	4.59604	6.86493	1.29516	0.0481993	1.75651	0.00370461	0.461356	0.342874	0.946783
Pdk1	59.2022	32.3185	61.7867	71.0944	37.3441	35.7406	43.5155	6.15095	5.27813	-1.2158	4.60832e-09	-0.775023	6.28877e-05	0.440778	0.0569677	-0.440778
Pdlim4	58.8138	43.6419	29.5082	56.1533	35.0402	23.0916	59.1191	43.2045	15.6616	-0.514736	0.00589494	-1.35467	1.4146e-10	-0.839938	0.000220878	0.839938
Phyh	25.6187	38.9079	39.6995	15.1713	36.8258	25.939	14.7881	31.9966	28.1511	0.942243	0.000117822	0.72334	0.00414092	-0.218904	0.315466	-0.419203
Pianp	0.232369	7.57743	2.87507	0.232369	6.59366	4.48282	1.41033	2.58215	4.17273	3.95855	1.94239e-05	3.23709	0.0020354	-0.721458	0.184114	-1.43195
Pisd-ps1	30.6395	0.260504	22.1239	58.3452	0.249195	33.8905	12.4245	9.11773	0.232369	-3.46614	4.24731e-20	-0.86951	0.000459437	2.59663	2.38294e-09	-2.59663
Pisd-ps3	5.62554	26.827	0.239504	11.1892	26.8242	0.933925	17.9347	13.8426	0.232369	0.95083	0.00165227	-4.93509	2.02456e-10	-5.88592	9.16383e-20	3.02608
Ppic	8.181	2.22049	1.23942	6.98504	6.47709	4.27531	5.07306	1.05866	1.13281	-1.141	0.0400981	-1.73188	0.00461311	-0.590881	0.424469	0.590881
Ppm1l	1.06742	3.55738	3.69847	1.22271	2.95708	3.39429	1.15666	3.28841	2.57993	1.67984	0.0476241	1.66054	0.0503513	-0.0193005	0.97592	-0.0193005
Ppp3cc	27.4692	22.0007	43.2092	25.9941	34.7989	68.8148	25.1122	27.9152	39.1182	0.120071	0.61591	0.928834	1.15632e-05	0.808763	9.96196e-05	1.63778
Prelid2	1.16534	5.0586	3.45034	0.698134	5.5566	9.26455	4.97224	10.1314	2.842	1.55914	0.0075154	1.0587	0.0940618	-0.500442	0.303364	-0.985869
Pttg1	17.08	2.01919	1.26384	31.0944	2.93717	2.16096	24.4931	2.23783	1.86003	-3.33546	1.34628e-14	-3.82662	2.11524e-16	-0.491155	0.548825	0.491155
Pydc3	62.9192	29.1184	125.656	62.9515	32.9379	32.9313	53.727	25.1784	53.8515	-1.05083	1.38375e-07	0.223004	0.179689	1.27383	4.1858e-11	-0.584966
Rab3a	2.02191	0.232459	0.234319	4.72885	1.24817	1.48231	1.26739	0.233323	2.99639	-2.81125	0.0129481	-0.993181	0.234861	1.81807	0.170355	-1.81807
Ralgapa1	3.53951	0.926482	3.28087	4.96276	2.06821	0.918154	6.57977	1.84347	0.235461	-1.64929	0.0143529	-1.97837	0.00525278	-0.329077	0.724313	0.329077
Rccd1	7.68644	10.9375	14.3521	7.90513	8.11749	14.2395	5.8337	9.98617	9.64808	0.392788	0.339362	0.761334	0.0484742	0.368546	0.307721	0.758492
Rhob	4.11308	17.3642	2.94473	6.09886	39.791	5.61555	5.62623	22.0082	4.70439	2.28778	6.90672e-11	-0.213432	0.68576	-2.50121	4.48374e-12	-4.37813
Rnf135	2.0418	2.34335	4.46763	1.56644	2.71142	5.28313	1.76847	3.02652	5.96227	0.402002	0.597334	1.27561	0.0517767	0.873607	0.153761	1.7805
Rnf144a	4.4436	1.11297	2.78038	3.79096	1.12147	0.723604	4.83634	1.03716	3.91317	-2.05944	0.00971875	-0.711794	0.261029	1.34765	0.13173	-1.34765
Rnf157	0.757547	3.51702	2.92526	0.885354	5.3271	6.18098	1.56486	0.530625	3.25776	1.28361	0.105877	1.52345	0.0451752	0.23984	0.695296	0.502874
Rpl13a	2531.22	1579.9	1708.79	2847.68	1915.21	1836.71	2864.44	1741.86	2106.37	-0.659415	4.76459e-15	-0.569895	1.13183e-11	0.0895201	0.29007	-0.0895201
S100a8	3.74891	2.13809	2.50775	6.02569	0.757959	2.31283	1.0512	0.376377	1.52705	-1.82152	0.0279875	-0.66216	0.330309	1.15936	0.20876	-1.15936
Sez6l2	0.985016	1.69039	0.232379	0.579373	1.55005	0.232511	1.26265	0.946922	0.232886	0.703164	0.480545	-4.2563	0.0404249	-4.95946	0.00824082	2.81617
Sfi1	17.5639	31.0402	34.3766	12.931	14.5732	41.5738	10.0629	19.3128	0.232369	0.659884	0.0249215	0.866647	0.00228572	0.206764	0.418564	0.432323
Sgk1	34.125	69.2798	46.0939	37.0598	54.6053	36.1408	37.7261	71.5009	49.4135	0.84268	6.57974e-06	0.241705	0.2334	-0.600975	0.000837135	-1.18226
Sh3pxd2a	6.02263	4.70615	3.1877	8.0638	4.24078	2.72028	7.35363	4.62245	2.92018	-0.582607	0.238649	-1.23002	0.0250863	-0.647415	0.284602	0.647415
Sidt1	47.8576	41.6535	87.3753	41.5851	33.8633	108.129	28.9582	49.3374	70.4294	0.0685512	0.733121	1.13227	6.73194e-11	1.06372	5.8632e-10	2.14778
Slc15a2	5.62518	21.329	0.252834	6.68602	12.4181	0.256585	24.7663	0.282236	0.323864	-0.206862	0.554988	-7.84877	4.97973e-13	-7.64191	1.63245e-11	7.64191
Slc1a5	70.0854	31.3964	47.8181	84.2067	56.5253	28.3855	66.4903	33.5624	63.6115	-0.853656	1.75624e-06	-0.674761	0.000101617	0.178895	0.359803	-0.178895
Slc26a11	9.13137	4.04308	5.01863	10.2593	4.61734	3.43421	5.3921	9.27047	3.53294	-0.414798	0.357752	-1.01261	0.041474	-0.597815	0.261168	0.597815
Smc6	34.1588	114.126	26.2532	36.1958	117.672	27.3415	41.2009	117.254	35.531	1.64762	8.31288e-23	-0.341809	0.119215	-1.98943	7.8107e-30	-2.95848
Snhg9	11.0308	4.13367	4.04351	16.0455	6.68816	18.2707	7.77562	1.559	17.2707	-1.42067	0.00143504	0.132078	0.700633	1.55274	0.000354338	-1.13247
Socs3	31.2284	34.5991	53.0003	33.7435	53.2825	56.4394	28.0162	39.366	52.3571	0.44509	0.0350919	0.767972	0.000134862	0.322882	0.0864023	0.665114
Stat1	92.8382	121.894	170.519	82.7665	131.672	167.174	73.8311	110.568	117.893	0.542271	0.000136862	0.845943	7.3597e-10	0.303671	0.0184529	0.624809
Stat5a	16.3359	2.70512	8.14622	15.1497	2.77437	9.03908	9.88603	2.74493	9.33916	-2.17023	3.56546e-06	-0.676475	0.0631578	1.49375	0.00424402	-1.49375
Stat5b	41.8344	21.0057	12.3443	39.2244	18.6525	12.5888	38.118	21.373	13.8066	-0.965382	4.00347e-05	-1.62827	3.81242e-10	-0.662887	0.0281325	0.662887
Tbk1	23.1358	44.8632	24.6426	24.3098	36.6228	26.6954	22.1355	32.3406	25.0391	0.719717	0.00181653	0.13502	0.5913	-0.584698	0.00941172	-1.1508
Tdgf1	2.1778	1.94327	6.85006	1.31007	2.43226	12.2052	2.02051	1.7576	8.65362	0.252005	0.766789	2.42391	3.89468e-05	2.17191	0.000120058	4.3943
Tgtp1	43.3881	63.1973	110.548	58.1978	83.0125	126.078	56.0065	77.3783	67.0833	0.501955	0.00302181	0.931172	5.98897e-09	0.429217	0.00413484	0.876244
Tgtp2	22.2101	41.9286	18.1638	0.236165	16.0964	4.72201	3.32504	8.33798	22.997	1.39176	2.36361e-05	0.85246	0.0172489	-0.539299	0.0588518	-1.06013
Tigit	1.71857	4.97688	5.20776	1.88563	3.43477	6.97937	1.26683	3.50457	3.8998	1.23258	0.0876423	1.62323	0.0160509	0.390647	0.47546	0.805684
Tlr6	4.5858	4.23096	10.6922	4.06522	7.29624	8.90948	2.7827	6.22529	4.37127	0.493365	0.360488	0.96772	0.0515814	0.474355	0.29961	0.971855
Tmem181c-ps	3.86722	8.9832	7.98834	3.4651	8.14805	3.06033	5.4803	7.86451	5.54898	1.04526	0.033688	0.473954	0.379755	-0.571301	0.206963	-1.12769
Tmem64	17.9355	14.051	11.3065	13.5048	11.7026	8.71263	15.619	12.4383	8.99158	-0.339062	0.290945	-0.746533	0.0290445	-0.407471	0.259285	0.407471
Tmod4	1.29565	8.79884	7.0998	1.32231	1.34481	7.60344	4.68891	9.71599	8.38601	1.4896	0.0115949	1.66975	0.00345479	0.180144	0.685162	0.381778
Tnfaip8	22.6725	12.7891	15.2266	19.4957	13.1862	17.6544	26.4796	12.974	14.9606	-0.803023	0.00641911	-0.524184	0.0618925	0.27884	0.382297	-0.27884
Tnfrsf14	41.7763	118.294	96.532	55.4215	77.1543	75.618	43.5697	84.0057	45.5825	0.981223	3.39411e-09	0.614002	0.000404261	-0.367221	0.0159734	-0.716555
Tnfrsf9	2.67868	2.9556	4.2273	2.98589	3.47372	4.5021	2.19615	4.08142	9.02806	0.312824	0.642745	1.13054	0.0539103	0.817719	0.14139	1.66572
Tnip1	22.3012	40.1897	25.4553	27.0022	44.2356	20.4108	18.5153	29.5967	25.844	0.74051	0.00138218	0.0393703	0.878196	-0.70114	0.00222488	-1.38428
Trim12a	41.7163	46.2153	4.87219	42.8198	44.3371	3.78786	35.4565	43.3047	47.4871	0.145127	0.463832	-1.12207	2.69016e-06	-1.26719	6.04803e-08	0.828549
Trim68	4.43092	7.50682	9.44034	4.7217	8.57422	8.78853	3.16999	5.86166	6.22011	0.925808	0.0651649	0.967514	0.0516316	0.0417069	0.92191	0.103107
Trmt1	13.854	7.42102	9.1414	13.8888	23.5048	5.01501	17.5723	17.7366	8.35493	0.0868939	0.776185	-1.08146	0.00335184	-1.16835	0.00129959	0.903418
Ttc13	29.3309	46.4678	43.8946	29.9083	29.9487	45.0375	29.4584	54.3508	67.6042	0.55952	0.00853062	0.810034	7.54975e-05	0.250514	0.183488	0.522767
Unc45a	21.5349	35.2748	42.7623	21.8548	20.819	43.0536	19.6103	35.9364	34.5959	0.519734	0.0345248	0.894625	0.000113577	0.374892	0.079662	0.770193
Xaf1	10.131	45.3771	12.7993	10.7511	25.266	12.7454	8.96884	36.8122	10.3226	1.82618	1.09025e-10	0.239029	0.51023	-1.58715	4.79155e-09	-3.15869
Zbp1	38.2092	62.5642	67.4791	39.2917	62.4215	66.5955	39.6827	57.2733	53.142	0.633214	0.000704779	0.653388	0.000442058	0.0201742	0.905551	0.059274
Zfp825	14.876	23.7199	22.0769	13.9859	16.3411	24.2921	13.8503	19.2737	23.3419	0.451747	0.128902	0.657204	0.0221053	0.205458	0.441588	0.431339
Zhx2	14.6802	2.13344	2.39747	9.89338	10.0019	2.02126	9.67727	1.79165	2.0264	-1.31537	0.0026666	-2.53417	2.0753e-06	-1.2188	0.0672351	1.2188
Zkscan3	14.8522	10.0644	11.3554	14.9601	4.01378	13.4202	11.122	6.9681	8.69253	-0.962719	0.01197	-0.334386	0.331312	0.628334	0.119203	-0.628334
Zscan21	6.00672	1.31993	2.69166	2.76196	0.957599	3.08092	0.773857	0.674054	0.233186	-1.68618	0.0467386	-0.743479	0.302812	0.942701	0.324015	-0.942701

## Sheet: CD25+ NRP1+ Treg Cells
Cell Type	Naïve CD4+ CD25high NRP+ cells
Culture Conditions	Ex vivo
Mouse Gene Symbol	Wild Type: Stat5a+/+ Stat5b+/+ (RPKM Replicate 1)	STAT5A-deficient: Stat5a-/- Stat5b+/- (RPKM Replicate 1)	STAT5B-deficient: Stat5a+/- Stat5b-/- (RPKM Replicate 1)	Wild Type: Stat5a+/+ Stat5b+/+ (RPKM Replicate 2)	STAT5A-deficient: Stat5a-/- Stat5b+/- (RPKM Replicate 2)	STAT5B-deficient: Stat5a+/- Stat5b-/- (RPKM Replicate 2)	Log2 Fold Change (STAT5A-deficient ÷ WT)	p Value (STAT5A-deficient vs WT)	Log2 Fold Change (STAT5B-deficient ÷ WT)	p Value (STAT5B-deficient vs WT)	Log2 Fold Change (STAT5B-deficient ÷ STAT5A-deficient)	p Value (STAT5B-deficient vs STAT5A-deficient)	Paralog Preference Rank
0610010K14Rik	8.68389	14.4555	22.8624	13.8563	18.4236	22.3634	0.402023	0.000475431	0.854751	9.79996e-07	0.452727	0.151057	0.94458
2610035D17Rik	1.12631	1.28917	0.370826	10.6008	1.64167	1.12405	-2.01244	0.524491	-3.48364	0.0408771	-1.47119	0.1475	1.47119
2810417H13Rik	1.41151	4.72964	9.98924	2.1847	1.90384	4.41244	1.10974	0.619964	2.05573	0.0446752	0.94599	0.127145	1.94599
4930470H14Rik	29.2571	32.3651	17.4455	31.1477	46.0451	13.3362	0.30577	0.554496	-1.10486	0.00857917	-1.41063	0.0400518	0.420583
4930481A15Rik	0.965054	0.232369	1.69544	4.74193	0.67264	0.232369	-2.4709	0.445749	-1.61283	0.0472646	0.858063	0.216659	-0.858063
5830417I10Rik	8.39269	4.72445	4.35338	12.0644	8.06624	4.66556	-0.686434	0.00110502	-1.2451	0.0776097	-0.558664	0.121612	0.558664
8430419L09Rik	12.4398	14.9465	14.93	5.61983	21.3478	16.9835	0.921914	0.00759555	0.716111	0.00646824	-0.205803	0.971212	-0.375728
A130040M12Rik	713.928	718.88	1575.87	596.294	526.297	973.59	-0.145523	0.30487	0.847585	0.00566942	0.993108	0.0784393	1.66299
A330049N07Rik	0.287257	3.52061	0.640435	0.276324	0.382136	1.59709	4.63336	0.00455302	4.20256	0.239325	-0.430803	0.0881278	-0.845841
A730063M14Rik	0.232369	2.82793	5.62475	1.31663	0.936047	3.29658	1.77351	0.14171	2.8742	0.0367202	1.10069	0.535057	2.27061
AA465934	6.5485	51.0421	4.0809	7.25141	40.5288	7.36331	2.63047	0.0295294	-0.450737	2.76339e-06	-3.0812	0.0107591	-4.89594
Aamdc	4.18063	5.13811	1.12247	12.4034	0.232758	5.35645	-1.7167	0.695437	-1.49727	0.0396599	0.219424	0.0869229	-0.219424
Abhd14b	2.58349	3.37262	1.02036	3.42697	0.863368	0.334137	-0.635547	0.135111	-2.50267	0.0225049	-1.86712	0.418986	1.86712
Abhd17c	13.4067	18.0776	22.1891	14.3025	20.473	28.3614	0.418887	1.18596e-06	0.776745	0.590506	0.357858	9.35692e-06	0.753787
Acot7	16.5245	36.8999	25.176	13.0564	22.4712	21.4286	0.90017	0.118896	0.5051	0.0158423	-0.39507	0.391941	-0.754151
Adamts10	23.6546	15.6997	17.4575	30.7856	13.8289	23.2669	-0.942566	0.415088	-0.566053	0.0432587	0.376513	0.223732	-0.376513
Adcy7	26.5207	21.5493	17.2629	42.6853	32.2435	29.0247	-0.445133	0.370583	-0.71185	0.0103979	-0.266717	0.090927	0.266717
Ahnak	68.9439	75.9589	44.8757	47.2578	49.7936	38.1399	0.0471366	0.000739654	-0.591435	0.0179157	-0.638572	0.256037	0.425
AI504432	52.9363	46.837	25.0666	34.9816	34.8925	22.3717	-0.173639	0.624436	-1.01149	0.0263482	-0.837854	0.00617719	0.837854
Akr1b3	5.9047	16.2175	15.3944	13.2475	32.4819	16.596	1.25802	0.00046298	0.63886	6.85536e-05	-0.619157	0.632998	-1.20412
Amigo2	0.331663	3.83079	11.9644	1.75507	0.572604	5.50487	1.18673	0.460362	2.96336	0.0157284	1.77664	0.0852581	3.62463
Ankrd10	37.3022	24.5182	29.7099	18.1483	7.00645	21.8961	-0.850094	0.00104669	-0.189946	0.00236294	0.660149	0.791853	-0.660149
Anxa2	16.3943	24.2722	41.1657	17.2322	16.6075	33.9509	0.240092	0.353079	1.07137	0.0252826	0.831277	0.175887	1.70254
Apobec2	2.06821	0.463907	5.61989	4.66221	1.37482	0.359929	-2.68794	0.00231607	-0.323559	0.0222899	2.36438	0.345127	-2.36438
Arhgap27os3	8.83974	17.8294	28.0482	14.7478	19.4159	30.4151	0.549482	0.0408889	1.15885	0.600519	0.609368	0.120726	1.2579
Arhgap31	16.9529	2.84938	3.27222	8.64414	15.5822	2.03317	-0.520725	0.0453879	-2.44766	0.873475	-1.92694	0.0610466	1.92694
Arl2bp	33.0227	34.6641	25.4072	29.6149	36.1229	8.62524	0.100196	0.47928	-0.996233	1.53708e-11	-1.09643	8.15181e-10	0.723571
Art2b	53.6334	43.0987	46.9529	47.5027	56.428	16.3196	-0.11493	5.68282e-05	-0.804283	0.053874	-0.689353	0.0322646	0.689353
Asb8	0.232713	8.6728	6.25356	2.28872	7.44379	6.45442	2.8322	0.0411152	2.38561	0.672169	-0.446593	0.0952644	-0.861631
Atn1	16.6982	10.6609	8.47509	15.9358	20.4058	12.2764	-0.161393	0.685181	-0.825864	0.007007	-0.664471	0.0177484	0.664471
Atp10d	10.5774	25.074	10.936	12.0912	17.8458	18.2554	0.826344	0.316999	0.224374	0.00894593	-0.601971	0.101388	-1.17025
Atp6v0e2	1.04383	3.71806	3.52803	0.340674	1.54444	2.74524	2.33895	9.81079e-05	2.51947	1.23351e-07	0.180517	0.157056	0.40291
Atp9a	7.17178	9.83545	18.9079	7.39415	14.0883	21.8616	0.699286	0.0126356	1.43102	0.00646086	0.731731	0.819095	1.50432
Aurkb	0.455932	2.4824	5.01079	0.791844	0.689871	1.80647	1.37772	1.36875e-09	2.51935	4.71228e-08	1.14163	0.480702	2.36402
Axl	1.52088	9.19221	2.103	2.16689	8.73057	8.83849	2.05481	0.0432164	1.31675	0.000917238	-0.73806	0.190028	-1.44855
B3gnt5	0.232415	4.71385	1.47441	0.873318	2.55911	1.65444	2.74415	2.25691e-10	1.34271	0.00121032	-1.40144	0.000245171	-2.81648
Bambi-ps1	21.4153	9.25043	9.32828	16.923	10.5302	13.3035	-0.992023	0.384343	-0.892118	0.00622899	0.0999048	0.0590697	-0.0999048
Batf	42.7117	62.5491	81.7209	44.9545	67.8289	74.1441	0.501222	0.0162391	0.715617	0.344044	0.214396	0.117971	0.466375
BC017643	34.102	19.2745	23.4818	15.0561	10.3471	20.9178	-0.825206	0.132135	-0.263608	0.0271896	0.561598	0.479874	-0.561598
Bcl3	19.0648	20.6155	41.375	24.0268	35.0355	40.8367	0.30807	0.0372792	0.81998	0.0440786	0.51191	0.932757	1.06211
Bcl9l	18.7991	10.1661	10.0766	24.2692	19.7278	15.0082	-0.588658	7.50344e-06	-0.886557	0.0174766	-0.297898	0.0309733	0.297898
Bhlhe40	4.98133	13.3233	14.8962	5.87622	12.6694	10.6816	1.15749	1.98564e-07	1.12043	0.83165	-0.0370592	4.94219e-08	-0.0370592
Birc5	2.15238	3.9608	7.89833	0.371362	1.42103	4.32279	1.1867	0.247773	2.38532	0.0216827	1.19862	0.238334	2.46165
Bmyc	43.4522	62.0043	67.2681	43.4961	83.0475	70.3536	0.680614	0.021822	0.562057	0.0821003	-0.118557	0.563314	-0.200434
C1qtnf6	3.02509	12.3048	10.6818	7.18087	10.2686	15.6583	1.05363	0.951511	1.31056	0.0365015	0.256932	0.0399315	0.552387
Camk2a	1.30231	4.01965	3.97424	1.43638	1.80266	5.96502	1.44191	0.00145496	2.12677	0.0310148	0.684859	0.290103	1.42182
Carns1	21.7071	12.6576	12.291	18.8106	19.6457	11.2519	-0.383478	1.1681e-07	-0.937972	0.348677	-0.554494	7.67613e-06	0.554494
Ccdc117	41.789	18.0338	14.0736	12.663	9.48638	14.0559	-1.09388	0.0416018	-1.07856	0.231266	0.0153198	0.382038	-0.0153198
Ccdc69	15.1103	28.3673	14.2083	17.6681	26.7824	18.9335	0.662408	0.045595	-0.108174	0.00254661	-0.770582	0.217845	-1.2912
Ccr6	9.1958	20.7043	12.8312	8.41843	11.5166	8.5148	0.878754	0.0359401	0.260408	0.716702	-0.618345	0.0721617	-1.20331
Ccr7	99.592	134.631	177.267	107.224	123.458	184.015	0.245592	0.0277715	0.693267	0.440742	0.447675	0.00268332	0.932303
Ccr8	7.23065	18.8273	18.7865	14.6552	13.4305	26.5907	0.465729	0.00159031	0.950575	0.0014397	0.484846	1	1.00841
Cd274	15.1437	22.696	28.0991	21.5392	28.4492	38.0791	0.389529	0.279507	0.724068	0.00028686	0.334539	0.00728476	0.706507
Cd44	17.409	23.8779	39.523	15.4247	17.8027	22.1516	0.318875	0.00254658	0.840949	0.152392	0.522074	0.103231	1.08395
Cd55	11.3613	8.44262	7.46695	15.5225	9.0399	7.1955	-0.733732	0.00144194	-1.04743	0.482245	-0.313698	8.23242e-05	0.313698
Cd69	50.2584	88.0096	102.952	37.5511	42.8371	89.0821	0.501182	0.324694	1.0146	0.0458395	0.513413	0.306956	1.06495
Cd74	20.2612	15.2148	74.5409	59.1894	70.0221	103.155	0.0337025	0.216678	1.06288	0.003209	1.02918	2.513e-05	2.09552
Cd81	33.1894	57.3371	55.2154	26.0724	54.2145	47.1542	0.838007	0.000732871	0.678862	0.0079732	-0.159145	0.42018	-0.281135
Cd82	46.1055	91.492	82.6317	49.6429	55.5813	105.269	0.541994	0.323734	0.860529	0.0238724	0.318536	0.196749	0.673452
Chaf1a	1.02149	2.80407	6.94965	1.73005	2.52906	4.02445	0.892972	0.00356753	1.71278	0.0590751	0.819809	0.284531	1.69428
Cic	15.5976	8.85183	24.3966	22.1427	13.8565	24.378	-0.791899	0.00231605	0.227151	0.0051758	1.01905	0.748903	-0.227713
Cks1b	6.07898	8.97812	18.4256	4.57744	4.50255	10.8747	0.272313	0.042843	1.2768	0.583864	1.00448	0.129817	2.05511
Coro2a	46.9649	104.24	38.596	40.6774	47.7001	44.7045	0.715469	0.045595	-0.175499	0.00517733	-0.890968	0.334908	-1.32847
Crebl2	21.3234	33.738	25.1618	12.8494	27.8218	43.0708	0.791821	0.0295427	0.888825	0.00326861	0.097004	0.444917	0.23027
Crip1	212.303	363.69	409.937	170.303	279.288	187.767	0.678912	6.49131e-07	0.532323	0.533757	-0.146589	9.73437e-06	-0.251263
Ctse	48.5815	103.776	8.6673	55.3003	107.621	120.668	0.954428	0.0138866	0.218029	0.222475	-0.736399	0.201585	-1.44195
Cttn	0.232795	1.86313	4.16987	1.17773	1.76453	3.65713	1.77351	0.00277157	2.70786	0.170322	0.934348	0.0951959	1.93435
Cxcr3	10.3161	20.8007	15.9261	11.5907	25.8106	25.3217	1.01786	0.0610574	0.785248	0.00453684	-0.232617	0.324023	-0.429654
Cyp4f18	19.8702	15.1687	14.5463	39.7704	24.7112	10.9825	-0.654658	0.183772	-1.30995	0.0178907	-0.655295	0.266691	0.655295
D3Ertd751e	0.236724	2.53806	2.94729	0.245844	3.84832	1.49349	5.41558	0.0134145	4.59767	0.96454	-0.817914	0.0107841	-1.62527
Ddx6	49.8327	34.0028	28.56	44.2144	40.9296	32.2699	-0.397038	0.0209475	-0.73112	0.0666718	-0.334082	0.604284	0.334082
Dnah8	41.2521	47.1137	16.4554	18.298	25.2636	16.2641	0.21462	0.00401891	-0.987978	0.228571	-1.2026	4.06382e-05	0.486076
Dnaja1	160.248	91.4123	60.7776	44.8528	38.1617	46.5002	-0.739935	0.499487	-1.03359	0.000634977	-0.293653	0.00538099	0.293653
Dnajb1	143.685	52.3904	39.4096	42.2257	41.1065	38.5741	-1.07106	0.0146929	-1.36126	5.61908e-05	-0.290194	0.107795	0.290194
Dnajb4	23.3199	8.04233	6.34238	6.90398	5.89503	5.84471	-1.1621	0.171287	-1.41819	5.75506e-05	-0.256087	0.00737535	0.256087
Dok2	49.6415	91.4134	134.098	86.0957	88.9313	89.7977	0.332203	0.257817	0.608798	0.0124641	0.276595	0.164835	0.592097
Drosha	9.68607	13.9319	16.53	6.83393	12.875	17.6345	0.590849	6.93416e-06	0.926406	0.000455972	0.335557	0.310701	0.709952
Dtx1	39.4538	49.6361	59.5925	41.0216	76.5522	73.3241	0.593768	3.86399e-06	0.623984	0.329342	0.0302152	0.000207681	0.096813
Dusp4	18.0604	45.6888	78.7286	26.6949	40.1582	43.0572	0.860163	0.669384	1.32511	0.0475656	0.464948	0.116258	0.96942
Dusp6	9.99981	15.3352	24.4433	13.2058	18.962	22.0147	0.48903	0.353087	0.886268	0.0408609	0.397238	0.249018	0.833337
Dynll1	86.4636	57.9136	55.2183	50.1537	43.9656	39.9668	-0.486525	0.000610821	-0.626646	0.0024626	-0.140122	0.670481	0.140122
Dyrk4	0.782799	1.0112	1.86435	0.431774	2.23487	5.88423	1.3777	0.293003	2.70811	0.0392456	1.33041	0.304521	2.74545
E2f1	1.34249	2.91008	6.48696	2.33607	2.59389	4.53161	0.892972	0.309661	1.71291	0.000155197	0.819942	0.00472306	1.69441
Egr2	11.1621	16.1169	20.1671	10.5977	16.3377	21.2359	0.465673	0.011807	0.78475	0.00766878	0.319077	0.888109	0.676629
Elmod3	4.27287	1.38302	5.37003	5.754	1.44939	6.01707	-2.30047	0.0141309	0.0280735	0.694997	2.32854	0.00386369	-2.13489
Eml2	14.0856	22.5508	22.118	14.9797	29.9072	26.3892	0.79457	4.14682e-05	0.615431	5.77921e-08	-0.179139	0.140228	-0.322096
Emp3	123.298	59.3664	93.5312	143.885	83.8026	73.7822	-0.971945	0.000211522	-0.777541	5.16833e-07	0.194404	0.186203	-0.194404
Eno3	16.0411	47.6422	45.7468	22.8682	34.6322	33.3926	1.0147	0.0136829	0.905942	0.0039041	-0.108758	0.673311	-0.180017
Eps8l1	6.19212	0.313397	3.78716	28.1805	0.962791	0.362572	-4.94214	0.0108169	-3.14259	0.00105798	1.79955	0.469374	-1.79955
Fabp5	16.7187	20.2272	41.9422	11.5757	14.4313	33.9309	0.15663	0.033562	1.2758	0.00791287	1.11917	0.595925	2.27963
Fam46a	4.86383	0.813975	1.39233	4.02281	3.96934	1.23504	-0.897739	0.0259324	-2.18516	0.215469	-1.28743	0.309532	1.28743
Farp1	2.53808	0.646125	0.232369	1.50549	0.883518	0.325031	-1.323	0.0483163	-5.01334	0.0967422	-3.69035	0.740441	3.69035
Fbxo17	6.19575	28.2113	16.3888	8.09721	27.0228	32.6312	1.89004	0.0280788	1.68803	3.62989e-07	-0.202007	0.00346223	-0.368657
Fbxo27	0.232394	0.232422	4.72391	0.232374	3.24596	4.8356	4.23756	0.00115641	5.88354	1.13529e-07	1.64597	0.0360597	3.38294
Fen1	6.12753	11.2067	16.5996	6.94309	8.78458	11.1668	0.543931	0.344045	0.98872	0.000128955	0.444789	0.00355565	0.930216
Fggy	3.84115	0.482876	2.58012	1.79242	1.0503	1.96065	-2.47094	0.923557	-0.36122	0.00837517	2.10972	0.010351	-2.10972
Fignl1	0.232426	1.00191	4.01469	0.232372	1.16866	0.979018	3.69035	0.0119818	4.90756	0.000270387	1.21722	0.247372	2.53915
Fip1l1	22.9516	13.0165	9.88442	8.17923	7.58093	6.77999	-0.6299	0.0603724	-0.968951	0.0248585	-0.339051	0.716622	0.339051
Fos	107.648	55.6401	54.3609	140.83	133.687	55.7646	-0.461731	0.120717	-1.28609	0.000219202	-0.824356	0.028655	0.824356
Fosb	11.8349	5.62209	3.96664	13.5985	13.8037	2.45334	-0.447289	0.273942	-2.19266	0.0162449	-1.74537	0.184594	1.74537
Foxn3	19.0177	14.2783	14.8526	31.827	13.2271	13.3444	-0.985036	0.142516	-0.969835	0.0102779	0.015201	0.265616	-0.015201
Foxp4	16.8	7.67446	15.961	12.8324	8.65896	14.6382	-0.884942	0.0916945	-0.0614977	0.000129434	0.823445	0.0286828	-0.776139
Gadd45g	12.8149	20.0117	33.3884	12.6821	25.3584	18.394	0.715937	0.677624	0.858096	0.00070105	0.142159	0.000121028	0.322731
Galnt10	19.2962	10.4548	10.6292	25.1561	11.2698	10.8939	-1.13283	0.565913	-1.103	0.0238608	0.0298296	0.0881298	-0.0298296
Gbp2	55.6626	61.0918	71.8163	54.7588	72.2025	113.528	0.188591	0.0430066	0.636807	0.689124	0.448216	0.0958208	0.932092
Gbp4	49.926	91.1078	82.4355	58.8819	78.8158	123.665	0.568562	0.00730444	0.810198	8.29288e-05	0.241636	0.205474	0.518746
Gbp9	50.2173	71.1906	70.5224	44.4536	62.9583	90.5689	0.438823	2.20888e-39	0.676227	2.03571e-07	0.237404	4.50196e-18	0.511165
Gimap7	98.6224	158.162	195.582	72.1544	152.264	172.815	0.785583	0.0148149	0.999211	0.144028	0.213627	0.313816	0.46498
Gins2	2.28821	4.56761	10.0032	3.4545	4.50626	7.26316	0.90665	0.129595	1.62546	0.0155009	0.718807	0.355556	1.48434
Glo1	36.5392	50.0187	20.159	17.6394	28.9901	17.0403	0.449199	0.0835947	-0.678727	0.00979766	-1.12793	0.3876	-0.292892
Gm10406	26.8149	33.834	24.2972	20.2638	54.7146	44.1725	0.846903	9.63548e-07	0.423686	0.00362342	-0.423217	0.0336004	-0.811488
Gm10409	12.6851	20.1766	12.711	10.7477	29.8209	25.4389	0.98213	0.161045	0.551597	9.62249e-05	-0.430533	0.00916151	-0.826462
Gm11127	87.4567	155.47	42.5613	41.5831	108.544	109.411	0.9601	0.386679	0.130358	0.0329061	-0.829742	0.199895	-1.62621
Gm11974	28.7923	15.0488	22.5327	31.8092	23.9945	18.1561	-0.714909	0.000442184	-0.680237	3.43212e-06	0.0346715	0.225265	-0.0346715
Gm12250	28.5507	43.6359	42.8414	20.1382	32.5166	55.5337	0.578471	1.91888e-05	0.904072	9.25467e-07	0.325601	0.532587	0.688171
Gm12505	44.7611	51.5606	93.5582	33.6924	33.6688	58.2517	0.0503301	0.789778	0.832189	0.0346893	0.781859	0.0162852	1.60352
Gm14085	28.032	13.1135	11.9291	32.9328	16.84	20.9683	-1.09155	4.81788e-05	-0.991065	8.7126e-09	0.100485	0.0863345	-0.100485
Gm16907	3.56205	1.49799	2.36635	10.5304	5.76703	1.68079	-1.15258	0.117121	-1.97036	0.0168331	-0.817773	0.406082	0.817773
Gm2897	9.65699	14.6938	13.876	8.45033	27.5541	19.7091	1.17718	0.565854	0.803393	0.0336918	-0.37379	0.116973	-0.712592
Gm3002	47.0454	77.8491	46.1146	39.7154	113.818	92.3234	1.06857	0.00129382	0.557872	9.54978e-06	-0.510694	0.184917	-0.987132
Gm3020	0.232593	2.29027	1.65178	0.848396	4.88499	4.02047	2.55573	0.0262828	2.30306	3.47776e-06	-0.252673	0.0148821	-0.475066
Gm3264	18.1384	27.6096	16.6209	14.4096	37.9462	31.1896	0.968835	2.72663e-07	0.474716	0.00012434	-0.494118	0.187326	-0.95355
Gm3383	14.6918	20.445	14.199	11.7247	31.805	25.7924	0.869656	0.719213	0.456398	0.0432841	-0.413258	0.0921983	-0.791769
Gm3696	17.4199	26.6168	17.8612	13.7506	40.7066	32.7109	1.05737	0.00326388	0.607508	0.0929591	-0.449863	0.179661	-0.864901
Gm4951	3.01941	6.35857	7.17611	3.08452	6.83799	10.6523	1.02407	0.830557	1.452	0.0128193	0.427921	0.00640913	0.897406
Gm4956	1.47783	0.431334	0.232369	57.7893	2.4035	0.460734	-4.84191	0.00124128	-8.53225	0.133659	-3.69034	0.0732353	3.69034
Gm5547	7.53226	0.600636	0.232369	4.38599	5.12454	2.26125	-1.05129	0.279518	-2.59378	0.00798156	-1.54249	0.0993838	1.54249
Gm5617	1.15665	2.33649	6.67441	2.49917	3.38482	3.58799	0.637771	0.0213044	1.71278	0.682027	1.07501	0.0514635	2.21251
Gm7367	38.8337	48.206	63.8592	32.7816	54.2493	68.2533	0.42963	0.171015	0.764322	0.0233824	0.334691	0.346292	0.70666
Gm8369	13.5815	8.61522	23.622	18.5364	9.24859	19.1891	-0.940016	0.00114293	0.271361	0.00789078	1.21138	0.537396	-0.286785
Gmnn	4.92202	10.4375	17.7826	7.87029	7.61021	13.7861	0.393275	0.00714832	1.18041	0.0440568	0.787132	0.479426	1.61721
Gngt2	9.62592	20.0969	24.504	16.5471	27.8364	28.522	0.754631	0.105288	0.887329	0.0268967	0.132697	0.551726	0.302622
Gpr83	129.927	86.5785	129.538	67.3915	47.2683	96.4005	-0.627565	0.100148	0.087518	0.00186053	0.715083	0.138873	-0.34192
Gprasp1	19.6413	20.605	8.84865	8.79894	14.63	6.20147	0.238661	0.257874	-1.05187	0.0441923	-1.29053	0.37257	0.501263
Gsto1	35.3993	18.632	15.3121	35.5887	21.3694	8.25174	-0.897022	2.76363e-07	-1.72816	2.45503e-05	-0.831138	0.337027	0.831138
H2-DMa	21.1179	24.8087	36.5255	25.7963	29.4209	44.8418	0.127901	0.0114523	0.692542	1.1521e-10	0.564641	7.2473e-05	1.16731
H2-Ea-ps	1.7553	7.36894	0.232369	0.232369	13.4681	6.93418	3.15109	0.391266	1.62295	0.0022415	-1.52814	0.0263132	-3.04271
H2-M2	7.69526	15.0705	0.39882	0.655511	9.18899	7.82236	1.32766	0.00166914	-0.273145	0.634598	-1.60081	0.000259791	-2.46956
H2-Q10	92.1836	162.254	34.3749	32.0799	107.054	98.9597	1.04404	0.00308931	-0.00509078	4.26372e-07	-1.04913	0.0318238	-2.05513
H2-Q6	404.175	574.123	244.574	283.922	555.563	459.584	0.64347	7.38821e-05	-0.0695305	0.110871	-0.713001	0.0103687	-1.25457
H2-T22	67.65	129.903	74.3296	38.7907	86.2958	107.607	0.940261	0.680192	0.657876	0.0151988	-0.282385	0.041345	-0.529478
Hbb-bt	1.81004	10.6891	33.4128	0.232426	10.0011	0.232531	3.22092	7.12968e-08	3.82993	0.98116	0.609009	4.14089e-08	1.26109
Hbs1l	24.9603	19.5631	14.1742	21.4954	18.2921	15.7785	-0.346305	4.51916e-06	-0.72236	0.00177232	-0.376056	0.132075	0.376056
Hist1h2bc	9.80155	5.05859	1.29146	6.74878	5.61423	3.50288	-0.691695	7.71948e-09	-1.83904	1.31037e-18	-1.14734	0.00105292	1.14734
Hmga1-rs1	21.0864	14.8718	48.9706	26.423	21.7	40.8232	-0.415483	0.885517	0.825724	9.89973e-05	1.24121	4.60529e-05	1.34751
Hopx	68.4653	38.1949	55.9398	79.2051	37.0023	55.1081	-1.04115	0.894644	-0.513586	1.99183e-06	0.527566	2.96268e-06	-0.527566
Hspa1b	81.0056	22.7675	6.66106	22.7618	10.7245	4.70774	-1.68037	0.0126074	-3.20662	3.00037e-05	-1.52624	0.0806415	1.52624
Id3	111.746	63.6758	80.8877	110.065	102.786	74.4895	-0.482341	0.134549	-0.627031	0.000230156	-0.14469	0.0273797	0.14469
Ifi204	21.759	37.1038	27.8572	18.9525	31.5983	30.4196	0.676847	0.68122	0.390165	7.3922e-05	-0.286682	0.000309391	-0.537226
Ifitm2	5.21215	9.44576	17.3442	5.91276	9.39609	17.7636	0.631087	0.00344175	1.54716	0.896873	0.916068	0.00441344	1.87543
Ifitm3	8.67273	19.1096	24.7886	5.42321	10.6686	25.8196	1.01919	0.273043	1.74456	0.0044919	0.725372	0.074359	1.49091
Igfbp4	51.7201	68.2456	95.6585	57.2871	43.9266	109.248	-0.0327471	0.515035	0.801988	0.0408187	0.834735	0.157749	1.64137
Igj	0.474049	0.349883	2.99073	0.254917	1.87989	1.26029	3.69034	0.00162519	4.59767	0.0135177	0.907323	0.476372	1.90732
Igsf23	12.9792	15.8381	22.9813	12.0641	16.3578	37.7131	0.282491	0.00154585	1.17358	0.000695192	0.891093	0.832487	1.82183
Igtp	154.724	203.274	193.723	127.143	204.884	278.741	0.460543	2.03014e-11	0.6391	1.2972e-18	0.178557	0.0297917	0.391828
Iigp1	45.2511	79.4312	89.9664	31.1919	78.2972	98.9406	0.973122	0.916936	1.20394	0.0216827	0.230813	0.0266331	0.498435
Il12rb1	7.59531	13.6258	13.2176	9.72385	19.6713	19.1885	0.839898	0.908565	0.716411	0.0064942	-0.123486	0.00837017	-0.210949
Il1r2	3.50111	17.4647	20.2169	5.88097	8.91658	21.5441	1.29295	0.149416	1.94452	0.0252727	0.651576	0.408605	1.34345
Il7r	100.266	96.9957	50.1957	75.2088	38.1552	36.8435	-0.445994	7.64561e-05	-1.11654	0.0299952	-0.670549	0.059928	0.670549
Inppl1	2.54513	9.27187	6.34895	2.68481	10.4076	14.6975	1.56574	0.478016	1.67275	0.00525633	0.107014	0.033944	0.251404
Insl3	15.5792	17.6003	35.1101	31.0934	44.6502	40.5565	0.349694	0.0162391	0.583109	0.000471325	0.233415	0.228203	0.504062
Insl6	3.88493	10.1176	9.51684	5.91033	14.3023	11.7675	1.17823	0.175273	1.01698	0.0314357	-0.161253	0.421893	-0.286784
Irf8	8.35663	14.5538	19.5497	9.05661	21.7034	22.0944	1.04302	0.424169	1.18835	0.0168661	0.145331	0.107826	0.328195
Irgm1	49.8274	70.072	61.3343	47.5153	73.05	96.9347	0.472484	0.00137442	0.580921	0.0053394	0.108437	0.632936	0.252347
Isg20	9.08519	12.8564	25.2121	18.3254	23.775	30.2496	0.380626	0.331493	0.913788	0.0326423	0.533162	0.217791	1.10507
Islr	0.232372	1.52355	3.00021	0.366288	1.41047	3.28707	4.23757	0.0223788	5.16277	0.0271775	0.925202	0.928811	1.9252
Isoc2a	16.5987	11.2933	13.2762	15.7823	8.2049	18.1035	-0.86275	9.08152e-05	-0.197913	0.000249802	0.664837	0.785344	-0.664837
Isoc2b	7.9134	0.94134	11.9175	12.0789	5.4072	11.1489	-1.78061	0.119098	0.091828	0.0122454	1.87243	0.340422	-1.48714
Itgae	38.1077	90.0314	52.8833	33.8929	40.4206	125.816	0.779112	0.109637	1.20622	0.000252335	0.42711	0.0314173	0.888558
Itgb3	5.89292	5.78459	3.44963	9.8663	3.54287	1.91047	-0.740359	0.107478	-1.75264	8.8164e-10	-1.01228	4.96649e-06	1.01228
Itm2a	53.7832	71.061	130.59	51.784	57.643	67.8042	0.211001	0.0373748	0.796214	0.170662	0.585213	0.458863	1.21061
Jmjd6	36.8397	23.0048	21.3778	21.8841	20.9885	19.1396	-0.493709	0.0292654	-0.667666	0.87748	-0.173957	0.0180656	0.173957
Jun	70.1595	34.4067	35.9442	66.1141	79.6651	45.2271	-0.326203	0.106459	-0.854789	0.00434922	-0.528586	0.21291	0.528586
Kcna3	43.2082	37.6855	24.982	45.4007	52.6434	33.2046	-0.0236031	0.051526	-0.708347	0.0166004	-0.684744	0.653719	0.636381
Kcnf1	1.69615	21.7493	15.3048	0.741468	13.7012	24.6913	3.44482	0.474082	3.55987	0.000259599	0.115056	0.00303909	0.267059
Kdm3a	26.1439	22.0665	15.1262	21.1281	19.3645	16.4415	-0.26807	0.140789	-0.706309	0.00381235	-0.438239	0.152243	0.438239
Klf6	45.6563	34.3409	23.6926	34.8683	28.9	25.5131	-0.433635	0.0076391	-0.802851	0.00892137	-0.369215	0.942875	0.369215
Lad1	10.1776	14.6325	31.6165	12.6643	16.789	25.1616	0.402012	0.24466	1.19428	0.0440346	0.792267	0.391056	1.62516
Lag3	7.69619	19.0665	25.9633	10.4358	19.8657	25.8312	1.03693	1.74241e-05	1.41352	1.5958e-07	0.376585	0.340167	0.791623
Lars2	170.806	120.668	92.83	93.1342	58.7354	58.58	-0.62432	0.00893409	-0.906514	5.67625e-05	-0.282194	0.154681	0.282194
Ldhb	28.9666	34.4332	48.0626	30.0885	54.3882	48.0326	0.50362	0.353087	0.592003	0.0408771	0.0883835	0.249095	0.213914
Lgals3bp	17.8173	24.3799	31.015	19.3982	28.7716	32.8984	0.444809	0.0255925	0.679303	0.0590781	0.234494	0.713209	0.506573
Lgals6	3.02115	0.232712	2.52098	2.53415	0.232486	2.8656	-5.26891	0.441558	-0.106136	0.00279388	5.16277	0.000151306	-5.16277
Lig1	7.08054	8.48099	19.2113	5.12319	10.9011	13.8507	0.584556	0.151601	1.33849	0.000952592	0.753936	0.0552982	1.5504
Litaf	2.97938	6.56094	14.228	4.94079	5.5361	14.2932	0.618437	3.20743e-06	1.67864	5.07794e-05	1.0602	0.509454	2.16712
Lmnb1	15.4485	20.9358	31.1169	13.0417	13.8354	18.6056	0.248611	0.0159005	0.7235	0.686156	0.474888	0.0394706	0.989461
Lrrc32	81.0118	54.0787	102.499	108.762	57.7405	56.1086	-0.833447	0.658555	-0.376642	0.0158082	0.456805	0.0399317	-0.456805
Lrrc57	6.87244	1.73163	0.592063	1.93196	0.232386	5.90233	-2.15103	0.0295167	-0.461639	0.00137817	1.68939	0.302632	-1.68939
Lta	35.3841	22.416	27.7248	58.3956	31.6744	24.99	-0.854165	0.200256	-0.918122	0.00968288	-0.0639571	0.181498	0.0639571
Ly6a	62.6052	193.698	160.041	105.175	205.728	354.929	1.17894	0.00161526	1.51139	0.000359116	0.332452	0.685503	0.697025
Ly6k	14.7823	3.45075	5.19282	4.3346	3.36453	4.70299	-1.7073	0.00573676	-1.02257	0.743131	0.684727	0.0129797	-0.684727
Macf1	87.6682	65.9996	56.9092	75.9115	59.9764	58.4882	-0.451813	0.640983	-0.620308	0.00988398	-0.168495	0.0314143	0.168495
Maf	17.7823	43.4863	26.6163	17.7228	27.2853	23.7327	0.884432	0.00472628	0.391766	6.96421e-05	-0.492665	0.2459	-0.949523
Malat1	130.811	126.508	83.719	242.072	219.669	142.184	-0.175877	6.144e-07	-0.828728	8.44367e-10	-0.652851	0.247027	0.652851
Map2k7	18.5108	8.12641	10.0272	20.976	12.4069	11.0552	-1.06569	0.0202295	-1.03255	9.26415e-12	0.0331328	3.32939e-06	-0.0331328
Masp2	5.31217	5.09739	1.29703	3.75867	4.28044	1.36295	-0.0707264	0.0286885	-2.18516	0.0054026	-2.11444	0.554817	2.11444
Matn2	1.41495	0.430736	0.383478	2.67096	3.19021	0.32344	-0.464954	0.302598	-4.70252	0.0410828	-4.23756	0.308068	4.23756
Mbnl3	12.7031	13.4193	28.1273	9.95376	7.64251	13.8704	-0.201762	0.0343068	0.754769	0.00052828	0.956531	0.169297	1.42176
Mcm2	15.6699	22.7097	36.2269	15.7351	21.1667	24.0162	0.385736	0.625484	0.794126	0.00173803	0.408389	0.0076436	0.855848
Mcm3	11.6119	20.6641	39.8843	13.5871	19.5698	27.0632	0.582177	0.0366327	1.25077	0.00461536	0.668597	0.453468	1.37713
Mcm4	18.2214	27.449	39.006	18.3584	25.6891	29.1843	0.484164	0.334201	0.805216	0.00179429	0.321052	0.0267819	0.680594
Mcm5	11.5395	22.9311	41.4728	12.6953	18.2146	25.6911	0.638406	5.33435e-05	1.30689	0.00379723	0.668481	0.17538	1.37702
Mcm6	26.0253	25.8433	70.6214	24.2551	21.8742	31.0225	-0.130474	0.24241	0.915336	5.0739e-05	1.04581	0.00311964	1.81343
Mcm7	25.844	29.3229	49.2464	22.0669	27.8765	31.9201	0.175347	0.457972	0.6432	0.011217	0.467853	0.0676551	0.974813
Med21	35.102	25.585	21.6509	28.8374	20.9628	23.4366	-0.5159	2.68762e-07	-0.615244	2.59445e-22	-0.0993439	7.58332e-08	0.0993439
Mettl23	47.6949	70.919	30.055	62.0608	35.343	32.6592	-0.125162	0.0895433	-0.911021	0.0110321	-0.785859	0.397051	0.785859
Mfge8	5.34942	0.967732	5.56149	2.88636	1.04146	1.03176	-1.98423	0.0173882	-0.295511	0.000106285	1.68872	0.129407	-1.68872
Mid1	2.20162	1.72798	1.22586	8.87921	8.64679	1.36111	-0.0709119	2.27963e-05	-2.47004	6.84003e-08	-2.39912	0.238447	2.39912
Mki67	2.12819	5.1416	11.458	3.34427	2.75108	5.93252	0.590669	0.102414	1.62533	0.0106622	1.03466	0.265918	2.12212
Mthfr	1.18159	3.55878	5.63989	2.38798	4.19901	5.76992	1.29816	0.239022	1.83666	0.0210151	0.538501	0.252754	1.12346
Mtif3	0.232369	3.00803	3.12476	1.54565	6.54825	4.66592	2.16309	0.368588	1.81095	0.000699563	-0.352135	0.0108744	-0.674063
Mtm1	0.245124	2.8952	3.0717	2.24295	6.21045	0.233676	2.01373	0.0358381	0.445396	0.0114497	-1.56833	0.667415	-3.1533
Myb	14.7173	5.19276	12.0062	17.1179	3.12009	5.73943	-2.04921	0.00275352	-0.932954	0.0143675	1.11625	0.570327	-1.11625
Ncf1	5.31221	8.85593	20.3089	8.78919	10.3756	15.9319	0.364915	0.191536	1.24382	0.0173901	0.878907	0.279234	1.8009
Ncoa7	25.5646	33.6679	88.9056	17.7734	20.0324	69.0231	0.222663	0.214665	1.73077	0.00589352	1.50811	0.121496	3.057
Nkg7	16.1594	31.9986	37.9076	18.0436	59.3465	94.0377	1.34421	0.265088	1.84574	0.00021651	0.50153	0.00937033	1.03813
Nqo2	1.30957	1.74348	0.232769	1.9481	0.959724	0.232374	-0.0682718	0.0403796	-4.30584	0.0310471	-4.23757	0.921641	4.23757
Nr2c2ap	22.3669	16.1399	10.8887	16.6523	12.2025	13.0601	-0.547353	0.716484	-0.804975	0.00195451	-0.257623	0.000482222	0.257623
Nrn1	11.7134	9.5493	5.99251	15.3633	9.84177	5.06776	-0.501397	7.26346e-06	-1.39066	4.16013e-11	-0.889262	0.0281371	0.889262
Nsg2	120.841	2.78859	3.89401	54.3402	2.02421	81.41	-5.15523	0.0370382	-1.14539	0.000144181	4.00985	0.0818907	-4.00985
Nt5e	52.0649	69.2342	38.3002	63.3545	38.902	27.614	-0.162296	0.00667033	-0.908873	0.00351814	-0.746576	0.843226	0.746576
Nucb1	40.6088	67.1854	55.4761	35.7814	69.3623	64.3636	0.74743	0.0847596	0.518548	0.041604	-0.228882	0.757979	-0.421527
Olfr98	0.299845	1.53561	0.592927	0.38547	0.774478	3.11463	4.23757	0.210504	4.59794	0.0224618	0.360372	0.294836	0.775409
Pdcd1	17.2619	29.8044	24.1554	15.029	29.4543	24.9877	0.807539	0.105952	0.503599	0.0367923	-0.30394	0.000186226	-0.571873
Pde2a	11.0185	5.22036	3.6927	10.1147	5.91573	3.17609	-0.993976	0.0279703	-1.66996	2.40063e-05	-0.675983	0.0362605	0.675983
Pdk1	18.1127	2.1029	2.89023	24.7529	18.0149	14.4489	-1.1696	0.951501	-1.4379	0.0365009	-0.2683	0.0399316	0.2683
Pdlim1	44.6644	26.6519	32.0752	41.0307	22.3561	13.9525	-0.881322	0.0183521	-1.01012	0.210208	-0.1288	0.256602	0.1288
Penk	11.0601	44.0009	61.5098	23.2899	31.9524	38.1012	1.08496	0.0241205	1.44195	0.520493	0.356985	0.0956866	0.752914
Pgam1	35.469	48.7171	55.8381	30.6311	38.9859	51.6374	0.342277	1.13555e-13	0.60008	0.43546	0.257803	1.06359e-16	0.553259
Pgpep1l	18.6273	7.17255	11.3862	17.3661	12.6912	14.3554	-0.914348	0.0119596	-0.631424	0.00304405	0.282923	0.654104	-0.282923
Phc3	16.9722	11.7291	7.47039	10.5127	10.2529	9.02803	-0.417204	0.0703424	-0.909079	0.0411472	-0.491875	0.81972	0.491875
Phyh	22.6821	38.9433	37.8709	18.4575	42.6128	35.8451	0.9253	0.526177	0.740485	0.0217275	-0.184814	0.00314025	-0.332913
Pigx	16.1785	36.0375	44.3527	27.8477	44.2552	41.2515	0.78835	3.71641e-10	0.838549	1.31314e-07	0.0501991	0.175412	0.137662
Pisd-ps2	19.7614	11.1497	23.0421	41.8514	16.8697	20.1297	-1.21382	0.00392706	-0.634973	0.83941	0.578844	0.00179199	-0.578844
Pitpnc1	28.186	25.4907	18.9283	31.4298	23.779	20.0365	-0.338889	0.223758	-0.703748	0.0185952	-0.36486	0.24873	0.36486
Plac8	5.11119	0.423244	2.17547	9.08296	2.40578	9.87186	-2.77939	0.231982	-0.326703	0.00945321	2.45268	0.144833	-2.45268
Plec	30.1575	12.2258	11.3177	17.2309	15.2544	27.3442	-0.867739	0.192928	-0.413173	0.0306464	0.454566	0.383276	-0.454566
Plekhg2	35.0144	24.0804	16.9199	27.0503	15.6933	22.001	-0.701983	0.7451	-0.774932	0.0140897	-0.0729485	0.00495247	0.0729485
Pmepa1	4.98743	6.30945	13.731	8.13378	13.4746	25.8209	0.470567	5.81031e-06	1.50177	3.37021e-05	1.03121	0.662244	2.10521
Polr2d	0.236284	18.5875	24.1838	6.51082	19.0687	11.4576	2.34242	0.479703	2.18665	0.000748031	-0.155763	0.00673574	-0.274407
Prelid2	7.01524	14.7705	7.58625	3.28776	10.1715	12.0061	1.23669	0.0431087	0.880683	0.495421	-0.356008	0.00623456	-0.677936
Prim1	4.28707	11.0439	17.3598	6.44604	7.80916	9.21882	0.843837	0.0503401	1.25563	0.0108335	0.411789	0.54763	0.864302
Psmb9	149.961	230.524	239.574	171.553	307.528	367.999	0.670994	0.58522	0.810765	0.000320823	0.139772	0.00206968	0.313558
Pttg1	27.0184	5.09618	7.67863	34.1124	5.60069	6.75876	-2.52519	0.0281663	-2.12023	0.0968831	0.404958	0.576062	-0.404958
Pum1	18.2046	7.27307	7.46173	13.8409	11.3901	12.0723	-0.895899	0.0488243	-0.854993	0.0157293	0.0409054	0.64889	-0.0409054
Pus10	0.586279	3.132	3.70977	0.94376	0.249049	4.61386	0.480668	0.00629196	1.97741	0.0653405	1.49674	0.346384	3.08171
Ramp1	18.6451	27.5383	14.2563	17.3128	40.8594	27.8599	0.863687	0.479381	0.113703	0.0380232	-0.749985	0.158381	-1.46619
Rbl2	32.4451	45.0735	52.2066	31.1461	31.7944	52.027	0.216992	0.0180319	0.612885	0.109693	0.395893	0.42287	0.829546
Rec8	8.01333	0.384577	3.45428	7.97883	0.521223	0.558473	-3.86238	0.0253758	-2.0627	0.10433	1.79968	0.524364	-1.79968
Rgs2	11.7241	5.94077	6.22121	11.9176	8.11104	3.64474	-0.841986	0.00617136	-1.35716	7.91045e-08	-0.515175	0.00619993	0.515175
Rhob	7.49707	13.6949	3.92297	6.90329	22.1689	4.83592	1.2809	0.101087	-0.735442	0.0176721	-2.01634	0.462156	-1.90803
Riiad1	1.84987	0.564598	0.232369	0.880025	2.12384	0.232369	-0.0682873	0.222521	-4.30585	0.0140236	-4.23757	0.211177	4.23757
Rilpl2	25.6542	32.6479	42.3082	26.9617	38.2058	48.7781	0.348886	0.252191	0.669626	0.00111214	0.320739	0.0300475	0.678787
Rln3	40.9037	73.3493	155.615	47.7123	65.0081	92.1875	0.559992	0.0314805	1.36557	0.00221593	0.805579	0.345205	1.65125
Rnf144a	3.29832	0.689618	2.30176	3.04225	0.23237	0.726474	-2.47092	0.840893	-1.06648	0.0175756	1.40444	0.00931172	-1.40444
Rpl13a	2171.96	1390.51	1850.95	2390.07	1689.43	1691.19	-0.638654	0.109739	-0.474655	0.0340038	0.163999	0.604024	-0.163999
Rpl26	0.232793	29.027	16.1499	10.3534	19.563	14.4252	2.20292	0.326414	1.46125	0.00480407	-0.741669	0.0623812	-1.44949
Rpph1	6.01413	1.57007	0.232369	2.14827	0.957694	0.934252	-1.43702	0.0411165	-2.90821	0.265379	-1.47119	0.319927	1.47119
Rps19-ps3	300.151	205.067	201.797	311.577	238.646	239.097	-0.5348	0.00741577	-0.580427	0.154175	-0.0456272	0.196406	0.0456272
Rrm2	2.09174	7.02865	20.0766	3.2898	3.56954	8.06563	1.04199	0.00109844	2.3391	0.00926707	1.29711	0.49003	2.64503
Sapcd1	10.4509	28.781	0.232372	0.878213	27.8955	19.4469	2.28483	0.323747	0.672832	0.000903451	-1.612	0.0175366	-3.19696
Satb1	27.7827	31.6287	46.3775	17.4261	25.1188	29.4228	0.268101	0.268006	0.625143	0.0294137	0.357043	0.278376	0.752971
Scg5	2.29149	18.9138	28.1791	2.49491	2.84559	4.23624	2.34191	0.0551362	2.8407	0.0326333	0.498794	0.819182	1.03936
Scn1b	0.269736	5.92726	2.73258	0.516646	6.34984	7.36896	3.31919	0.0113123	3.02396	0.529963	-0.29523	0.0522253	-0.558265
Scpep1	2.93065	8.89539	10.8224	2.06802	5.37891	5.65065	1.38524	0.00169272	1.62531	0.00179338	0.24007	0.969786	0.520178
Sectm1a	0.4754	0.265647	6.03992	0.232369	2.50594	5.48813	4.23756	0.226072	6.01875	0.00700719	1.78119	0.0932513	3.65566
Serpina3g	16.1754	22.9879	8.0285	26.5618	25.2844	18.682	0.0864421	0.280385	-0.775842	0.0147741	-0.862284	0.170014	0.530702
Sesn1	81.929	77.4782	58.5905	57.1815	57.4306	40.5279	-0.124813	0.652338	-0.584308	0.0493596	-0.459494	0.0145665	0.459494
Sfi1	0.232369	22.4079	24.9072	15.5868	16.1727	44.9336	1.16806	0.00340963	2.01069	0.00393809	0.842636	0.947426	1.72399
Sh2d2a	29.6215	44.7918	58.4548	43.4845	47.3758	66.9082	0.261276	0.0243554	0.666308	0.0133992	0.405032	0.832222	0.847254
Sh3bp5	41.9232	37.2137	23.8476	37.3016	25.6423	23.871	-0.397601	0.0012084	-0.825628	0.567607	-0.428027	0.006125	0.428027
Sirt3	0.232401	3.71299	1.59112	0.233236	2.94391	3.93427	5.41558	0.0189203	5.16291	0.411628	-0.252677	0.119028	-0.47507
Slc15a2	60.402	0.281757	0.268281	10.4862	21.4852	0.277718	-1.80107	0.0455952	-8.77888	0.000160465	-6.97781	0.0328332	6.97781
Slc17a9	34.9396	23.3924	26.09	51.1552	24.1534	27.1445	-0.941132	0.0320312	-0.80523	0.354869	0.135902	0.204531	-0.135902
Slc1a5	98.1899	42.2981	68.2524	103.7	73.643	40.1068	-0.871291	0.261399	-1.01256	0.0262481	-0.141264	0.268208	0.141264
Slc28a2	46.5717	30.1575	23.7516	51.5086	40.2122	46.8431	-0.570934	1.35143e-05	-0.586156	1.6378e-08	-0.0152223	0.189522	0.0152223
Slc7a6os	36.8344	32.899	21.6335	28.9201	30.3858	24.8419	-0.138812	0.045595	-0.596918	0.0222806	-0.458106	0.731764	0.458106
Smc6	42.6062	125.994	40.6897	34.1404	117.502	31.3295	1.5899	0.102414	-0.206029	0.0222899	-1.79593	0.430016	-3.04782
Snhg9	21.8215	0.232369	0.232369	11.7583	0.232369	6.56606	-7.74032	0.000630915	-2.36045	1.33498e-06	5.37987	0.154646	-5.37987
Socs1	59.5489	92.7099	72.1298	61.0295	107.78	118.321	0.659477	0.437193	0.543364	0.0114559	-0.116113	0.0769027	-0.197309
Sorcs2	9.97324	4.2071	2.42734	7.1299	3.01055	1.58438	-1.33143	0.0304562	-2.14921	0.59009	-0.817779	0.0961343	0.817779
Sp140	18.555	23.4628	28.977	20.7905	27.4385	36.6949	0.249015	0.25068	0.611915	0.00543472	0.362899	0.0975899	0.763437
Stat1	104.511	146.26	169.326	93.6983	195.64	254.212	0.708702	0.00292989	0.980768	0.000418114	0.272066	0.580379	0.578728
Stat5a	19.4412	3.78468	21.5168	26.2943	4.3579	16.9083	-2.53896	0.0527387	-0.314511	0.00207051	2.22445	0.248958	-2.22445
Stat5b	46.677	23.869	19.2156	52.2108	26.0342	17.9869	-1.05497	0.0240364	-1.52461	0.0201386	-0.469635	0.955033	0.469635
Stmn1	12.3649	32.5967	80.9905	14.1875	15.9517	36.8754	0.838388	0.0139387	2.06432	5.25256e-11	1.22593	2.80306e-05	2.49387
Swap70	19.7715	29.5755	33.5651	19.054	28.3778	35.999	0.49884	0.00255587	0.732613	7.10317e-07	0.233773	0.0470451	0.505075
Sytl1	24.94	32.5096	16.4214	27.2788	24.1024	15.5646	0.0602799	0.0473241	-0.806156	0.771678	-0.866436	0.0208403	0.613426
Tap1	103.959	149.941	172.953	119.555	172.477	214.177	0.451328	0.0144137	0.680815	0.00515341	0.229487	0.728228	0.49476
Tcf3	3.02276	5.62991	8.38879	6.1481	14.6299	7.52474	1.1365	0.200246	0.711101	0.0211912	-0.425402	0.297201	-0.817719
Tec	3.54644	3.52416	0.232764	0.995032	0.351903	0.232748	-0.379995	0.232877	-5.01336	0.0157197	-4.63336	0.20771	4.63336
Tesc	29.9702	21.9923	18.3064	28.6183	21.4837	17.8173	-0.526669	0.816047	-0.818783	0.0302557	-0.292114	0.0507531	0.292114
Tfdp1	23.8423	30.7413	44.7225	24.0171	26.0246	34.3559	0.175374	0.115244	0.607552	0.00535879	0.432178	0.223697	0.903069
Tgm2	1.47722	5.07539	8.94268	1.34068	10.1425	15.0812	2.74007	0.00267963	3.37574	0.000941795	0.63567	0.76916	1.31374
Tgtp1	47.2432	76.3928	70.68	30.5023	76.6115	79.9203	0.898521	0.000843961	0.843039	0.00339749	-0.0554821	0.662554	-0.0744652
Tgtp2	10.5811	0.283232	0.25664	18.0485	0.240565	9.57303	-7.5119	0.00540936	-1.62769	0.00573753	5.88421	0.970019	-5.88421
Thra	7.40549	4.3485	2.57327	9.21387	5.8182	2.70276	-0.740376	0.0113966	-1.49758	0.0212185	-0.757207	0.797133	0.757207
Thy1	161.275	139.597	135.736	212.399	164.835	98.4323	-0.362058	0.214148	-0.782482	0.00352056	-0.420424	0.0818435	0.420424
Tiam1	28.8503	40.932	48.4428	34.3954	37.3675	61.6054	0.235594	0.00235766	0.694416	0.000213484	0.458821	0.511447	0.954779
Tipin	5.14576	12.7291	19.4459	10.147	10.5859	14.4044	0.600874	0.103244	1.02041	0.000441346	0.419532	0.0519026	0.878964
Tmem184b	3.53727	16.0439	15.1303	7.10777	10.3101	10.6259	1.15751	0.0160666	1.12045	0.216489	-0.0370647	0.229112	-0.0370647
Tmem256	20.3013	29.3972	47.3588	33.4121	23.3921	43.9152	-0.099099	5.1795e-08	0.669168	8.58655e-09	0.768267	0.742705	1.34994
Tmem64	54.2981	32.4316	36.0159	51.3999	32.975	27.2075	-0.762373	0.331499	-0.844773	0.0178789	-0.0824002	0.138638	0.0824002
Tnfrsf19	0.449692	1.92246	6.43436	0.23238	0.609084	1.47458	4.23757	0.0455952	5.37906	0.000317215	1.14149	0.0537344	2.36389
Tnfrsf1b	35.1334	58.088	65.9633	47.9121	54.9932	67.899	0.372571	3.19825e-06	0.581305	0.624446	0.208734	2.35621e-07	0.454644
Tnfrsf4	126.849	188.129	343.605	190.772	211.999	315.618	0.259045	0.00701167	0.943825	0.359943	0.684779	0.0660121	1.40725
Tnfrsf9	32.8919	62.4271	74.0801	35.3193	67.4652	68.2625	0.850255	0.109032	0.951395	0.00992098	0.10114	0.296179	0.23966
Top2a	2.13797	7.59476	18.0955	2.63488	3.96536	7.98169	1.16571	0.273101	2.23298	1.00292e-06	1.06727	0.000132798	2.18275
Trappc13	0.242525	2.58235	7.48357	3.21187	3.08742	5.37957	0.892986	9.49793e-16	1.83654	2.90033e-19	0.943552	0.0932515	1.94355
Trat1	101.268	73.9911	59.5084	81.5112	51.0991	55.9223	-0.62131	0.270788	-0.766112	5.66651e-11	-0.144802	2.04729e-14	0.144802
Trub2	3.29461	5.48517	6.21074	2.26545	9.66159	3.27808	1.48363	0.0862829	0.720704	0.00139946	-0.762926	0.134514	-1.49989
Tspan3	15.9086	25.019	30.1146	12.9533	26.1185	39.2202	0.739234	0.000315566	1.13768	0.0385521	0.398444	0.112692	0.834543
Tspan31	15.7833	24.0175	25.2027	17.3828	28.717	31.782	0.609117	0.0135618	0.677263	0.000659631	0.068146	0.29618	0.173116
Tubb2a	13.5299	15.5051	26.6722	9.92344	11.845	16.9193	0.149418	7.49117e-12	0.76087	7.15047e-06	0.611452	0.00211481	1.26353
Tubgcp4	29.4925	24.437	15.4781	25.6765	24.5596	18.1988	-0.237925	0.0140869	-0.842517	0.0239986	-0.604592	0.827141	0.604592
Ube2l6	14.7894	27.0644	25.2011	20.4278	31.951	45.3038	0.678909	0.0411186	0.8891	0.123212	0.210191	0.575881	0.456831
Uhrf1	0.233449	4.93893	8.86805	0.98285	2.88976	5.14205	2.74415	2.45802e-10	3.50186	4.9554e-44	0.757709	1.04072e-81	1.56506
Vill	1.73428	0.232386	0.232369	5.46268	0.265239	0.295984	-5.48592	7.95016e-08	-5.48592	0.216677	0	1.65769e-05	0
Wbp1	3.14484	9.54206	4.61685	8.34219	16.9224	8.81623	1.21162	0.183734	0.236001	0.0266531	-0.975617	0.368902	-1.92315
Wiz	9.34886	4.32415	7.61222	8.28557	1.27124	5.33656	-1.80338	5.13851e-13	-0.490792	0.439574	1.31259	7.38002e-16	-1.31259
Xaf1	11.0498	47.3924	12.8502	11.9009	29.1753	16.1895	1.64558	0.0299714	0.224122	0.0592922	-1.42145	0.748906	-2.8114
Xdh	10.0681	4.86051	7.13954	10.8657	4.78656	7.0101	-1.1293	0.00730214	-0.687307	0.155791	0.441991	0.191969	-0.441991
Xkrx	2.7671	1.84211	1.00062	8.72804	5.45037	1.45753	-0.834457	8.26772e-07	-2.59385	0.0147621	-1.75939	0.0104567	1.75939
Zbp1	42.5516	61.2727	66.3836	39.2209	66.0655	95.851	0.558198	0.488923	0.873361	0.000311398	0.315163	0.00325234	0.666328
Zfand2b	10.2214	2.03508	19.4685	18.0472	0.233225	13.4584	-3.7712	0.000337613	0.0828111	0.000101254	3.85401	0.766423	-3.49574
Zfp672	5.89503	0.432025	3.52558	5.16347	0.232369	1.46881	-6.12627	0.0056249	-1.21871	0.0765873	4.90756	0.302285	-4.90756
Zfp692	10.972	4.9251	8.42599	12.5265	10.5639	5.00047	-0.651472	0.0210547	-0.984349	0.0476483	-0.332878	0.681767	0.332878
Zfp868	8.02702	6.31986	14.6396	7.82783	8.00365	18.6964	-0.261786	0.183771	0.971622	0.00979231	1.23341	0.178798	1.7973
Zfx	10.9229	3.74396	8.54596	3.20672	1.13205	6.87256	-1.52619	0.84288	0.0824827	0.000285403	1.60868	0.000524346	-1.25107
Zhx2	11.6513	2.02279	2.2084	10.2564	11.0455	3.04472	-0.822942	0.159637	-2.20808	0.00109933	-1.38514	0.0583311	1.38514
Zkscan3	8.39841	23.1849	30.9409	12.5339	15.6344	10.4037	0.81638	0.263671	0.850068	0.000938886	0.033688	8.42611e-06	0.105838
Zmat2	27.9121	44.2609	41.411	24.3573	41.5978	30.8733	0.652184	0.0705812	0.358909	0.00647082	-0.293275	0.345208	-0.549615
Zscan21	0.232372	6.85039	7.84928	1.11717	5.71932	0.232369	3.43313	0.130987	2.70732	0.00352155	-0.725815	0.140877	-1.42625
Zscan29	26.381	24.6233	13.9769	24.8206	25.9422	19.1525	-0.0717844	0.0230404	-0.733774	0.0287689	-0.66199	0.91937	0.66199

## Sheet: Naive CD4 T cell +IL-7
Cell Type	Naïve CD4+ CD44low CD25- cells
Culture Conditions	20 ng/ml mouse IL-7 (18 hours)
Mouse Gene Symbol	Wild Type: Stat5a+/+ Stat5b+/+ (RPKM Replicate 1)	STAT5A-deficient: Stat5a-/- Stat5b+/- (RPKM Replicate 1)	STAT5B-deficient: Stat5a+/- Stat5b-/- (RPKM Replicate 1)	Wild Type: Stat5a+/+ Stat5b+/+ (RPKM Replicate 2)	STAT5A-deficient: Stat5a-/- Stat5b+/- (RPKM Replicate 2)	STAT5B-deficient: Stat5a+/- Stat5b-/- (RPKM Replicate 2)	Wild Type: Stat5a+/+ Stat5b+/+ (RPKM Replicate 3)	STAT5A-deficient: Stat5a-/- Stat5b+/- (RPKM Replicate 3)	STAT5B-deficient: Stat5a+/- Stat5b-/- (RPKM Replicate 3)	Log2 Fold Change (STAT5A-deficient ÷ WT)	p Value (STAT5A-deficient vs WT)	Log2 Fold Change (STAT5B-deficient ÷ WT)	p Value (STAT5B-deficient vs WT)	Log2 Fold Change (STAT5B-deficient ÷ STAT5A-deficient)	p Value (STAT5B-deficient vs STAT5A-deficient)	Paralog Preference Rank
1700016L21Rik	2.72965	0.599927	0.232369	4.15837	0.959952	0.232369	2.22679	1.34709	0.232369	-1.55229	0.0736108	-5.78539	0.000433382	-4.2331	0.0429546	4.2331
2610035D17Rik	10.0578	0.827451	0.859142	1.11977	0.632037	0.482252	7.61293	0.490191	0.566686	-3.16381	6.43781e-05	-3.13863	7.61776e-05	0.0251799	0.98493	-0.0251799
2810021J22Rik	3.58629	6.58225	7.67617	3.99254	9.79869	9.8336	6.22652	9.35558	9.84502	0.865608	0.0646307	0.999013	0.0298782	0.133406	0.73653	0.240321
3110082I17Rik	8.48595	5.065	1.5756	8.52846	5.27687	0.971793	6.69406	4.49313	0.784849	-0.790054	0.0978109	-2.52898	8.18195e-05	-1.73892	0.0175529	1.73892
4930481A15Rik	3.14298	0.232369	0.258476	1.13295	0.232369	1.98258	3.03425	0.232369	1.75206	-5.43037	0.0017723	-0.775271	0.36873	4.65509	0.0178399	-4.65509
5830417I10Rik	11.9459	8.30828	5.43608	7.96294	4.79299	5.12618	10.4433	4.76405	5.04513	-0.751408	0.077674	-0.98474	0.0269644	-0.233332	0.642827	0.233332
8430419L09Rik	7.30571	20.132	17.8002	16.3534	15.3258	13.5513	6.5892	23.4893	16.5412	0.927598	0.00403665	0.712414	0.0337144	-0.215184	0.453756	-0.458455
A430093F15Rik	1.51877	3.304	3.67497	1.12006	2.80203	4.01915	1.28115	3.39303	3.69517	1.11814	0.169045	1.55347	0.0406652	0.435324	0.48718	0.850361
AA388235	5.24753	5.45768	5.92268	3.87715	12.2591	8.35266	5.56348	13.0948	10.9399	0.972401	0.0289665	0.738164	0.112351	-0.234237	0.551951	-0.497271
AA465934	11.2698	44.2505	16.0187	14.0455	37.6126	15.0775	11.247	30.8368	12.9341	1.62609	8.61311e-10	0.295796	0.36939	-1.3303	1.46032e-07	-2.69104
AA467197	1.80526	1.51454	0.41416	2.38001	4.59466	0.856687	8.92889	2.41967	0.434059	-0.541868	0.377996	-3.49058	0.000515785	-2.94871	0.00739449	2.94871
Abcg3	4.98206	2.46704	5.18981	4.58422	0.880016	7.12199	4.30934	1.2059	5.72468	-1.78465	0.0146154	0.366284	0.473921	2.15094	0.00175812	-1.0558
Abhd14b	3.18755	0.259859	0.419456	3.4089	2.43624	1.37605	3.51398	0.31574	0.28426	-2.24878	0.0151925	-3.11747	0.00364356	-0.868691	0.571239	0.868691
Acaa1a	28.5746	18.7253	30.2832	29.1058	18.3467	19.6726	30.2793	16.359	16.5724	-0.749448	0.00343068	-0.385312	0.112348	0.364136	0.181693	-0.364136
Acat2	32.8511	18.5889	12.6737	32.1936	25.0327	12.3612	27.7505	25.5067	10.4908	-0.428738	0.0707126	-1.39821	5.32009e-07	-0.96947	0.00113028	0.96947
Acss2	25.0019	21.4834	29.3266	19.8095	28.7897	37.6508	15.7061	29.7366	33.4562	0.3705	0.143766	0.719155	0.00283311	0.348655	0.123551	0.670583
Acvr1b	30.4322	21.0508	18.1932	29.3795	19.3408	15.75	29.4406	18.06	16.8015	-0.619812	0.0134685	-0.777606	0.00263021	-0.157794	0.579203	0.157794
Acvrl1	9.47852	3.52108	3.65374	11.3301	0.909653	2.31999	9.60613	0.696994	2.43663	-2.30973	2.93722e-05	-1.87785	0.000283668	0.431873	0.569747	-0.431873
Adam19	19.0602	2.55265	3.1104	19.7586	4.18091	5.72559	16.9687	3.16139	5.60327	-2.48534	3.72645e-09	-1.88131	9.38736e-07	0.604031	0.296931	-0.604031
Adamtsl4	25.7743	14.2868	5.67284	24.6005	18.4703	4.61078	21.0869	10.62	3.75403	-0.761005	0.00688024	-2.24308	5.4166e-10	-1.48208	0.000287835	1.48208
Adcy6	14.9612	15.7172	24.2076	16.9367	19.1107	27.8593	13.6418	17.7567	20.2973	0.184035	0.536457	0.651988	0.0186784	0.467952	0.0809617	0.909957
Adh1	5.30228	7.71503	10.0291	3.98541	4.73105	9.06931	4.30694	5.10862	9.66825	0.444761	0.393064	1.1549	0.0128752	0.710143	0.0981084	1.3982
Adipor2	41.8866	31.2034	25.1563	38.858	33.1584	26.7723	41.7917	32.4534	26.8785	-0.376818	0.0694802	-0.630189	0.00367043	-0.253371	0.268948	0.253371
Adpgk	59.4783	40.9673	31.4084	54.9027	50.0153	28.5015	51.2346	33.1859	24.8064	-0.43118	0.01927	-0.948243	2.19415e-06	-0.517063	0.0152131	0.517063
Agpat6	27.385	17.0858	14.4531	26.1408	15.7388	14.6978	23.3046	16.2972	14.4931	-0.651223	0.0157626	-0.811765	0.00352567	-0.160543	0.602312	0.160543
Ahcyl2	26.7262	5.71003	4.57495	22.1724	7.06766	8.26219	21.2071	6.61539	2.56654	-1.81855	8.53969e-08	-2.11048	3.86914e-09	-0.291928	0.545608	0.291928
Aim1	24.4295	22.5568	15.5824	27.0237	25.5839	17.4831	26.2125	21.9486	16.026	-0.136394	0.580541	-0.642761	0.0168797	-0.506367	0.0647155	0.506367
Akr1b3	12.569	12.9298	5.92485	14.2335	5.82793	5.74204	25.3184	13.7862	11.7991	-0.673342	0.0373147	-1.10262	0.00158146	-0.429283	0.269482	0.429283
Akr1c12	5.9798	2.25465	1.17046	3.25217	2.46941	1.04697	4.02622	2.08778	1.2375	-1.11371	0.0998231	-2.04897	0.0100337	-0.935259	0.327578	0.935259
Akr1c18	1.91088	0.521126	0.232369	1.77452	0.553892	0.232369	0.735995	0.779706	0.232369	-0.725095	0.466323	-4.9582	0.00866375	-4.2331	0.0429546	4.2331
Amica1	16.1333	5.51831	1.63899	13.102	6.66085	1.22777	11.4794	3.33517	0.944386	-1.33257	0.00111933	-3.26204	8.04352e-09	-1.92947	0.00650768	1.92947
Apobec3	17.4151	20.3664	21.1143	14.9586	0.236719	17.4925	26.8893	4.17659	3.51593	-1.31181	0.000106751	-0.481692	0.104408	0.830114	0.0236471	-0.830114
Apoe	4.45464	5.17131	6.16253	4.80139	6.07855	11.2186	4.83689	7.51933	13.44	0.416488	0.409489	1.09813	0.0152246	0.681646	0.104903	1.34061
Apol7e	8.15061	13.6211	24.0271	11.3731	1.02013	24.2674	21.2829	1.2145	8.44395	-1.33274	0.00111768	0.490878	0.10603	1.82361	1.34402e-06	-0.356432
Arhgap27os3	18.67	34.6676	44.7413	21.0025	36.4291	52.5167	21.5181	43.9688	64.4728	0.869686	0.000186233	1.39118	1.15444e-10	0.521493	0.00553691	1.01585
Arhgap31	4.36818	9.44374	0.777097	9.03247	0.655559	0.942735	7.28622	6.22272	0.597906	-0.338583	0.483196	-2.6639	0.000201528	-2.32532	0.00214142	2.32532
Arl2bp	44.2958	47.4918	11.8944	49.4745	50.0844	30.7886	46.3146	54.8434	32.962	0.109123	0.550856	-0.861511	5.27284e-05	-0.970633	3.44393e-06	0.623401
Arl5c	50.4277	31.0268	49.7253	57.1366	32.4441	56.0282	40.3095	35.3718	47.1503	-0.603722	0.00239022	0.0653618	0.717294	0.669084	0.000686478	-0.480645
Arsb	7.71614	4.4587	0.647706	7.55499	1.05009	2.47545	15.2283	0.428342	0.760933	-2.61204	4.94779e-06	-2.89603	1.54872e-06	-0.283991	0.760747	0.283991
Art2a-ps	7.17895	15.1577	7.49208	14.7253	12.772	17.3136	11.7816	28.8713	25.3528	0.722792	0.0215137	0.533152	0.101602	-0.189641	0.510808	-0.407821
Art4	2.22636	2.39608	3.97736	3.345	2.45322	5.69725	3.38804	3.82936	7.65474	-0.0194001	0.978198	1.16107	0.0471147	1.18047	0.0434287	2.3116
Atg14	6.09424	13.2313	17.0354	9.16621	13.2898	21.04	9.45783	11.5567	17.5521	0.639666	0.0888273	1.2243	0.000355784	0.584634	0.0571368	1.14406
Atn1	79.6939	84.1983	38.7231	86.2455	73.1003	30.5592	77.0268	66.2334	35.7584	-0.143471	0.341526	-1.18809	1.53563e-11	-1.04462	5.64339e-09	1.04462
Atp10a	46.0915	29.1068	5.84276	43.5459	32.8242	7.39881	49.2051	23.5589	5.43523	-0.711304	0.0005951	-2.93015	5.77873e-23	-2.21884	2.44152e-11	2.21884
Atp1a1	197.616	133.879	92.4265	210.985	139.005	104.728	179.957	132.462	92.527	-0.559589	1.41075e-06	-1.01396	1.68889e-16	-0.454367	0.000506917	0.454367
Atp1b1	78.8584	46.4356	42.2701	96.6157	64.6719	73.3641	85.8318	50.874	51.7647	-0.712169	7.06943e-06	-0.641065	4.75352e-05	0.0711043	0.682165	-0.0711043
Atp2b1	31.8252	32.761	16.2697	25.4798	20.2097	14.1119	30.3277	21.4684	14.9514	-0.25304	0.287281	-0.94124	0.000420625	-0.688201	0.0129814	0.688201
Atp9a	4.11313	3.17468	8.86985	2.59966	2.04207	10.4016	2.33394	2.52696	3.92846	-0.186083	0.787477	1.34498	0.0121107	1.53106	0.00545387	2.51253
Aven	24.7365	22.312	13.9384	30.408	24.8408	18.9392	36.3415	19.9567	18.3476	-0.460387	0.0558814	-0.825689	0.0012895	-0.365301	0.184391	0.365301
AW112010	37.0576	92.9959	171.156	28.0395	39.0531	80.0905	37.7036	60.5444	171.294	0.884227	1.93793e-06	2.03981	2.22728e-37	1.15558	1.70608e-16	2.28423
B4galt4	1.14851	0.865821	0.295396	2.01292	0.562348	0.277599	1.62792	1.04126	0.31628	-0.725085	0.466329	-4.95819	0.00866392	-4.2331	0.0429546	4.2331
Bckdhb	36.5765	28.7611	48.0473	29.9545	84.2489	44.6623	30.3106	64.752	48.3246	0.855436	7.86998e-06	0.546242	0.00659366	-0.309194	0.0797559	-0.645376
Bcl2	142.65	132.114	79.661	159.403	155.225	95.332	161.994	149.983	91.4932	-0.105908	0.373053	-0.79442	9.29583e-10	-0.688511	1.50746e-07	0.688511
Bhlhe40	2.23443	12.4476	5.88168	4.43105	6.7826	2.63311	2.00136	13.3096	9.32404	1.95805	0.00012163	1.16106	0.0471173	-0.796991	0.0575627	-1.62707
Bpgm	9.90572	11.6853	11.26	12.4456	14.4993	19.5759	14.5009	18.0828	26.2449	0.229204	0.483925	0.629008	0.0411761	0.399804	0.176339	0.773262
Cacnb3	0.879929	1.40978	5.74633	2.49978	3.70032	4.92061	1.3136	2.87289	4.79993	0.951613	0.25493	1.96361	0.00555929	1.012	0.0923872	2.012
Capg	37.5719	32.5111	20.7285	42.3849	30.635	14.1158	38.4541	25.8755	22.376	-0.409784	0.053828	-1.04003	1.038e-05	-0.63025	0.0119364	0.63025
Car2	1.06392	2.25914	5.09675	1.92233	3.32859	5.29324	0.573908	3.17213	3.26809	0.951581	0.254946	1.66744	0.0251143	0.715859	0.257415	1.4163
Casp8	44.6591	39.9208	17.7349	44.1775	26.7844	14.9361	39.4712	23.6743	16.344	-0.511261	0.0140855	-1.37484	1.00178e-08	-0.863584	0.000856938	0.863584
Ccl5	0.845386	2.68983	19.4617	0.647372	9.43274	12.1185	0.729308	1.52854	46.8896	2.14222	0.00615281	4.63372	5.30212e-20	2.49149	4.36426e-12	4.96954
Ccs	39.5529	40.8245	57.534	41.5179	50.3817	66.1745	32.9362	47.935	55.5159	0.253509	0.191954	0.653226	0.000382706	0.399717	0.0235659	0.772629
Cd101	2.39319	4.63437	5.81807	2.50426	3.95855	6.10995	3.13955	6.23477	8.27689	0.873529	0.152972	1.31171	0.0214253	0.438181	0.371577	0.853219
Cd274	5.51369	9.94471	26.2309	5.28454	6.28278	15.4223	4.91422	7.3256	18.6225	0.499322	0.285095	1.90326	2.99385e-07	1.40394	3.75424e-05	2.78726
Cd28	43.4819	57.9475	65.1512	48.8927	59.7776	77.1098	47.6445	63.2758	80.234	0.350478	0.0465932	0.672416	6.87125e-05	0.321938	0.044351	0.616508
Cd48	117.571	73.9482	60.1438	92.6103	71.6813	67.9812	107.875	63.9466	61.1001	-0.622934	1.72869e-05	-0.747546	4.45604e-07	-0.124612	0.437518	0.124612
Cd5	86.8329	101.136	117.957	68.7061	110.504	131.226	65.2922	130.97	126.647	0.613608	1.48411e-05	0.773701	2.8165e-08	0.160092	0.21236	0.292616
Cd6	56.891	76.3445	76.1468	49.3832	85.5042	89.0009	54.4194	98.8996	95.8879	0.685382	1.65836e-05	0.713124	7.38936e-06	0.0277418	0.847553	0.0277418
Cd69	6.27516	23.797	11.7076	13.1229	12.8098	6.86045	7.69195	24.4786	13.5226	1.15111	0.000430204	0.295551	0.434103	-0.855563	0.00605983	-1.74191
Cd7	32.1114	37.6378	69.3181	36.0671	48.8782	68.5738	26.1499	48.1445	44.0963	0.501921	0.0140832	0.959213	5.69694e-07	0.457292	0.00987674	0.888271
Cd74	5.25978	10.2612	9.47996	3.13813	6.28018	18.0433	5.11387	11.4788	51.8665	1.02515	0.0300704	2.59635	1.1798e-12	1.5712	3.21516e-07	3.12009
Cd79a	2.48718	3.90368	3.2203	2.13569	2.6651	6.45116	2.25824	2.30826	12.9377	0.552515	0.454776	1.85358	0.00188736	1.30107	0.01628	2.59057
Cd79b	1.41056	2.37655	2.11957	1.05154	2.21542	4.20627	1.59474	2.68426	9.94186	0.763122	0.376242	1.96378	0.00555518	1.20065	0.0530663	2.3933
Cd83	1.05316	4.40859	2.982	1.35105	1.63987	0.720787	0.818423	3.89011	3.4944	1.66345	0.0496581	1.18578	0.198006	-0.477663	0.491988	-0.992236
Cd96	27.5778	41.7113	47.0203	33.0789	42.2484	51.8132	31.6866	42.0932	46.3814	0.417769	0.0446068	0.647434	0.00133087	0.229666	0.223595	0.432295
Cdc25b	19.6494	22.9886	23.9385	21.7874	31.8094	36.5283	18.03	29.0218	35.2522	0.464709	0.0647478	0.684413	0.00504118	0.219704	0.330929	0.412349
Cdk5rap1	7.00727	14.4972	29.1817	27.7433	30.1733	28.4332	7.77787	31.7339	32.0144	0.800135	0.00403389	1.05468	8.44442e-05	0.254545	0.279013	0.482351
Cdk6	19.5459	5.99915	1.88805	13.6477	6.94729	2.00346	15.3402	5.70366	2.16307	-1.37882	0.000226982	-2.98803	1.1387e-09	-1.60921	0.0092949	1.60921
Cdkn2d	11.1492	12.6547	17.2845	13.9816	15.3821	23.414	11.4877	15.5903	17.0818	0.26866	0.414971	0.668121	0.0311856	0.399461	0.176711	0.772919
Cish	46.6835	33.9046	8.99434	40.1758	19.5113	4.99588	35.1358	28.9302	7.25355	-0.574852	0.00745498	-2.52172	1.36273e-17	-1.94687	1.68947e-09	1.94687
Cks2	15.1969	13.0672	8.21241	13.6647	9.61868	6.48788	9.84979	10.3962	7.63524	-0.259606	0.453239	-0.813797	0.0328846	-0.554192	0.162702	0.554192
Cmtm7	16.18	7.56824	8.033	17.0271	18.3541	7.63595	18.2868	9.3201	6.74028	-0.560489	0.0801839	-1.13573	0.00134341	-0.575243	0.137476	0.575243
Cndp2	51.0437	32.032	21.5608	44.5936	28.2985	18.7274	46.7753	27.7133	16.8489	-0.719308	0.000444975	-1.29219	9.62909e-09	-0.572881	0.0224412	0.572881
Cnr2	5.3133	8.0112	11.9923	6.00658	9.36478	10.6075	6.03946	8.40161	9.44366	0.532294	0.238167	0.913401	0.0317234	0.381107	0.32553	0.737251
Cpne8	309.549	234.639	395.997	250.324	778.328	332.935	224.754	541.637	365.92	0.968638	5.48927e-25	0.486701	5.32235e-07	-0.481938	8.95297e-08	-0.987921
Crem	9.69192	5.71017	2.0905	9.07149	3.17805	0.838296	12.2471	4.89712	3.11516	-1.15719	0.00992029	-2.33026	2.20138e-05	-1.17307	0.0780119	1.17307
Crip1	54.4596	304.18	199.413	149.339	338.634	332.868	54.1751	179.013	207.132	1.66026	1.52765e-43	1.53321	2.09927e-36	-0.127044	0.209356	-0.280608
Csrnp1	26.5071	19.4715	13.2363	30.4212	17.9096	14.1739	24.8562	18.5377	15.0144	-0.56852	0.0269381	-0.954855	0.000514476	-0.386334	0.198282	0.386334
Ctla2a	12.0761	10.6362	3.51807	8.41583	2.62019	1.04757	16.1102	3.08714	5.73945	-1.09488	0.00807337	-1.68823	0.000235201	-0.593343	0.280372	0.593343
Ctse	78.476	159.631	175.622	81.8287	151.049	22.6299	74.4733	137.721	88.504	0.920116	5.94988e-12	0.305005	0.0349853	-0.615111	1.72458e-06	-1.25576
Cxcr1	1.39064	1.52362	6.1196	2.29751	2.93875	4.62895	1.52769	3.68773	6.15864	0.807801	0.295179	1.73985	0.0086463	0.932047	0.105775	1.84958
Cxcr4	16.9824	30.5063	35.5314	28.7021	39.9477	35.4641	22.7407	37.024	49.3224	0.62571	0.00657826	0.804879	0.000344499	0.179169	0.378235	0.331172
Cyp2s1	6.25199	11.5369	22.5869	6.04373	10.2478	22.9033	5.18528	5.8441	16.5777	0.694764	0.11368	1.88697	1.85386e-07	1.19221	0.000207355	2.36214
D630039A03Rik	4.99038	1.60816	0.379588	6.15585	2.3263	0.291062	6.83236	1.45263	0.444703	-1.83322	0.00500261	-6.77228	6.79683e-07	-4.93907	0.00899939	4.93907
Dag1	17.5042	25.1492	29.7717	19.6577	23.6251	29.6606	16.8521	23.5091	25.8196	0.387693	0.143619	0.650821	0.0107948	0.263129	0.271226	0.499569
Dapl1	66.1581	84.0857	29.8658	43.9703	43.879	25.4268	68.453	24.8614	27.6234	-0.238485	0.169039	-1.09225	3.54396e-08	-0.853762	3.0278e-05	0.853762
Ddr1	4.55053	2.28068	5.61593	2.4691	1.03145	18.7908	3.58137	13.1129	12.0632	0.514003	0.356637	1.74245	0.00013183	1.22845	0.00318729	2.4379
Dennd2d	41.352	33.1095	43.7439	29.6772	58.7567	68.0531	32.9873	73.076	66.556	0.645076	0.000756817	0.79022	2.68828e-05	0.145144	0.394584	0.262638
Dennd5a	24.565	23.0379	15.5423	25.6122	17.7891	15.4042	23.9246	17.1164	15.6879	-0.389644	0.134199	-0.664828	0.01499	-0.275185	0.342768	0.275185
Dkc1	27.8733	25.564	20.112	27.476	22.1528	17.1128	28.511	21.7791	17.3889	-0.282284	0.244905	-0.628475	0.0147791	-0.346191	0.197826	0.346191
Dnajc15	24.7551	19.0397	13.6211	16.3553	9.42283	10.2675	33.2937	14.7904	8.05559	-0.801038	0.00419872	-1.19818	6.55225e-05	-0.397143	0.243916	0.397143
Dok2	46.4483	46.0721	46.9273	24.6522	45.7395	78.8683	21.8208	49.6781	59.0956	0.589548	0.00363322	0.99848	1.87405e-07	0.408932	0.0192789	0.790566
Drc1	7.46344	1.91659	0.359727	4.08305	4.56647	0.606259	5.09849	2.08978	0.270905	-0.838016	0.151825	-3.78673	7.2178e-05	-2.94871	0.00739449	2.94871
Dst	3.38507	0.850027	0.811816	3.70566	0.638866	0.558562	3.07108	0.785692	0.856815	-1.70168	0.0443367	-1.67582	0.047951	0.0258642	0.981541	-0.0258642
Dtx3l	22.0234	23.3279	41.0126	21.1525	21.8169	35.9924	20.6145	18.088	34.4117	-0.0423795	0.872819	0.800169	0.000586617	0.842548	0.000308769	1.55221
Dusp10	16.8199	19.6667	32.3948	19.8341	17.5923	26.9947	16.971	21.4846	29.4139	0.107658	0.700244	0.710327	0.00535188	0.602669	0.0158451	1.17946
Ecm1	670.014	190.881	25.6705	564.742	330.334	27.8394	482.547	173.322	19.3888	-1.32587	1.23512e-44	-4.54672	6.72226e-233	-3.22084	2.30039e-92	3.22084
Ecsit	5.62885	6.54793	3.18398	7.356	7.47247	0.233695	3.27911	0.233018	3.33885	-0.20994	0.68985	-1.38319	0.0318418	-1.17325	0.0779644	1.17325
Eif5a	191.495	156.07	109.721	149.107	117.2	78.8471	147.719	125.951	87.214	-0.311012	0.0093897	-0.815338	1.79652e-10	-0.504326	0.000136564	0.504326
Emc9	17.3309	26.8584	29.994	16.8855	29.4625	30.6758	20.4212	24.2109	30.813	0.545906	0.0362747	0.774346	0.00216339	0.22844	0.322035	0.430074
Eml2	6.78604	10.8626	13.0242	6.41899	10.2815	8.51057	5.01234	10.1003	9.71863	0.759019	0.0726268	0.83167	0.0474021	0.0726505	0.843612	0.118454
Epb4.1l2	9.6746	9.44281	9.41695	12.8851	6.26389	10.5402	8.53984	0.635888	11.1919	-1.01203	0.0189676	-0.0379591	0.917908	0.97407	0.0250051	-0.97407
Ephx1	24.5545	30.8196	44.1587	23.4081	35.6189	43.6859	25.0362	41.9366	44.8338	0.557426	0.0139969	0.871455	5.94557e-05	0.31403	0.1135	0.601128
Eps8l1	17.6174	0.443395	0.289359	4.12571	0.292044	3.08161	1.49427	0.278083	1.45585	-7.12329	1.6285e-08	-2.46821	0.000142106	4.65508	0.0178403	-4.65508
Epsti1	12.408	8.80338	8.9493	8.83472	4.52741	6.57369	18.1428	7.42399	7.52564	-0.907679	0.0185497	-0.689322	0.0650009	0.218357	0.614065	-0.218357
Esyt2	38.442	57.1989	64.6637	45.9716	62.5862	74.829	43.1956	56.9579	64.8316	0.458878	0.0110931	0.69779	6.85042e-05	0.238912	0.143793	0.450787
F2r	4.8321	8.34585	7.94846	7.23297	9.56009	11.5052	5.40043	10.1024	11.0328	0.694788	0.113668	0.868017	0.0427935	0.173229	0.648639	0.320071
F2rl1	31.1331	34.0991	13.486	18.0135	10.8702	17.547	35.0715	11.226	14.754	-0.603825	0.0181386	-0.859215	0.00132602	-0.25539	0.384901	0.25539
Faim3	0.945584	1.23685	1.32041	0.627794	1.30717	2.31943	0.737431	1.63206	7.59475	0.376966	0.71904	1.82586	0.0274113	1.4489	0.0613019	2.90833
Fam101b	47.9643	63.0387	76.9108	63.3121	76.9463	101.957	64.417	94.0697	119.144	0.399155	0.0123778	0.775878	3.49583e-07	0.376722	0.00876026	0.725526
Fam105a	40.122	51.8653	65.8218	48.385	58.9827	74.8883	44.2082	61.1251	64.3931	0.361856	0.0446953	0.64212	0.000220589	0.280264	0.0882398	0.533479
Fam46a	14.5605	12.9618	5.13311	10.1219	2.92789	4.0332	15.07	6.99786	6.41787	-0.813889	0.02996	-1.39782	0.000770367	-0.583928	0.218461	0.583928
Fam46c	40.036	72.9072	88.6447	51.1703	63.105	81.4243	45.2884	72.7532	81.1241	0.599536	0.000494102	0.890852	7.84255e-08	0.291316	0.0550109	0.5555
Fam84b	6.40452	9.02116	11.7267	6.65671	11.7447	13.1817	5.05385	10.9496	7.95721	0.804672	0.0551622	0.875893	0.0354196	0.0712207	0.844378	0.115615
Fbxo17	13.1029	45.3	40.6691	10.1992	44.4088	18.7987	12.8808	35.317	27.865	1.75983	1.22445e-11	1.29265	4.03095e-06	-0.467174	0.0270852	-0.961938
Fbxo27	0.579558	0.946481	1.36787	0.733569	0.233425	4.61109	0.751441	0.232558	3.80425	-1.45791	0.300556	1.69043	0.0459197	3.14834	0.00323374	1.96948
Fbxo6	2.23398	3.63866	1.44442	4.7017	1.3826	1.105	6.06577	0.237002	0.729337	-1.36879	0.0526509	-2.04886	0.010038	-0.680072	0.494822	0.680072
Fibcd1	1.7615	0.747209	0.302096	3.14984	1.09939	0.628508	3.27018	1.70055	0.52247	-0.989932	0.235907	-1.90753	0.0511709	-0.917595	0.423706	0.917595
Fkbp1a	108.209	109.087	67.5624	116.653	111.955	62.7298	108.53	103.985	69.1238	-0.0589185	0.656212	-0.731723	4.65442e-07	-0.672804	4.02122e-06	0.672804
Fnip1	23.5961	18.1767	9.34517	22.849	18.7326	9.73808	24.2993	16.5536	9.52265	-0.41353	0.122631	-1.27944	3.7132e-05	-0.865909	0.00884588	0.865909
Folr4	41.8893	15.4758	34.5484	23.8763	13.5118	30.3699	26.2812	12.636	26.2546	-1.14819	1.78712e-05	-0.00875536	0.968837	1.13944	2.16437e-05	-1.13944
Fos	15.9663	8.61127	2.54018	14.0262	9.62383	1.50376	13.1651	10.0491	3.2816	-0.58531	0.0932881	-2.39485	4.39349e-07	-1.80954	0.000526438	1.80954
Gabrr2	5.33469	4.19985	11.1703	2.99318	6.64155	8.50406	4.12067	5.57652	5.78976	0.477085	0.375375	1.11213	0.022091	0.635049	0.155224	1.24803
Gadd45b	4.08703	21.1567	11.9501	12.468	12.1504	6.86787	4.15979	28.0706	16.1516	1.58098	6.74234e-06	0.809987	0.0430475	-0.770995	0.0121386	-1.57245
Galnt10	23.3492	14.0312	14.6327	23.9222	14.4974	18.4747	26.1542	14.9125	16.4142	-0.781014	0.00539416	-0.565995	0.0376763	0.215019	0.485158	-0.215019
Galnt6	31.5003	26.6999	25.9652	32.4702	16.0284	21.0116	32.2855	18.6921	26.4045	-0.649283	0.00733912	-0.386893	0.0972992	0.262389	0.308706	-0.262389
Gbp2	18.2028	53.2476	159.767	15.3273	22.4395	88.7942	14.4422	20.5452	106.518	1.00774	9.62473e-05	2.92318	1.26407e-50	1.91544	1.98714e-30	3.80621
Gbp2b	7.65336	21.0614	2.25232	6.11394	18.0852	41.213	5.29511	15.0781	64.9051	1.47909	5.28659e-05	2.50544	7.36811e-16	1.02635	2.48661e-05	2.02635
Gbp4	63.7539	83.5601	182.52	43.8371	64.4114	105.203	44.2128	57.3497	113.804	0.410985	0.0148622	1.4081	2.41473e-21	0.997119	9.61651e-13	1.96869
Gbp5	10.5857	16.3572	23.5517	7.86941	11.0207	14.5088	7.63555	8.78822	16.6671	0.393056	0.288303	1.05514	0.00155075	0.662088	0.0334231	1.29952
Gbp7	15.88	22.8701	40.1704	13.6173	21.1345	38.3975	14.5606	16.5542	43.9182	0.417744	0.149194	1.44306	5.31586e-09	1.02532	8.56194e-06	2.02532
Gbp8	20.6466	24.836	67.4748	14.4662	16.9574	38.1048	18.6047	18.7744	43.621	0.155343	0.575597	1.46827	9.62431e-11	1.31293	2.60982e-09	2.60136
Ggact	30.9919	25.6285	17.504	36.1372	21.9298	14.1366	38.1188	20.2142	19.0512	-0.645238	0.00549123	-1.03187	3.27039e-05	-0.386632	0.15864	0.386632
Glipr2	38.4348	42.5645	30.8748	43.8242	43.5565	16.0414	40.6719	36.0796	21.8477	-0.019547	0.920788	-0.825118	0.000225578	-0.805571	0.000318093	0.805571
Glo1	19.4789	35.624	19.7401	38.0516	56.501	17.004	39.516	22.4739	17.6998	0.226333	0.281646	-0.808944	0.00113195	-1.03528	1.51482e-05	0.337034
Glrx	8.84763	14.6687	24.2534	13.3442	13.6278	17.8758	8.76996	19.1985	23.2546	0.608341	0.0690534	1.07169	0.00058217	0.463349	0.099146	0.900754
Gm10640	5.82533	9.32418	12.9598	4.09936	10.1978	13.8579	4.83372	8.43607	16.9454	0.821273	0.0720686	1.54961	0.000135717	0.728334	0.0389641	1.43288
Gm10653	43.428	57.4305	34.8332	47.2074	45.3428	25.5977	44.4423	30.1295	24.1066	-0.0412646	0.828089	-0.648349	0.00196158	-0.607085	0.00386617	0.607085
Gm10684	4.23308	1.56075	0.655315	3.06674	1.68553	0.532725	3.05052	1.23954	0.408335	-0.995766	0.185484	-2.22366	0.0165487	-1.22789	0.2603	1.22789
Gm10845	60.1914	61.8929	80.6959	52.6774	104.978	66.0672	48.0853	91.1597	74.4049	0.660342	3.39341e-05	0.463835	0.00472692	-0.196507	0.188366	-0.419832
Gm11346	46.442	57.7619	76.6524	50.6952	70.9139	82.7541	48.0974	62.8107	67.6823	0.385158	0.0257384	0.659878	7.60417e-05	0.274721	0.0808534	0.522648
Gm12250	11.121	21.9684	52.609	9.94345	11.2521	32.3264	9.73024	10.3284	42.873	0.450104	0.189932	2.04718	1.64756e-14	1.59707	1.01643e-10	3.17081
Gm14085	131.977	56.0513	101.321	171.884	42.3237	34.398	55.7845	80.0861	50.3577	-1.0346	1.67711e-12	-0.952336	5.91351e-11	0.0822679	0.621654	-0.0822679
Gm14446	5.84197	8.19544	13.8001	2.96142	4.68533	11.5984	3.66236	3.00673	14.9118	0.27649	0.605728	1.65205	0.000110722	1.37556	0.000713574	2.73311
Gm16675	4.23499	5.9982	9.82916	4.46189	4.79157	8.42298	4.21602	5.36429	7.11365	0.390503	0.474533	1.056	0.0313264	0.665497	0.145886	1.30935
Gm16907	6.25369	2.85286	1.45021	3.43959	1.42112	1.09645	5.35296	1.34997	1.32302	-1.47453	0.0335927	-2.15459	0.00584821	-0.680067	0.494826	0.680067
Gm19757	19.7326	18.1117	27.0545	17.4767	40.4621	22.5838	16.0789	33.0532	26.5159	0.758455	0.00286007	0.544889	0.039086	-0.213565	0.360017	-0.454573
Gm4759	34.2159	38.6046	62.6452	28.4111	31.4747	43.4817	23.497	26.268	43.8065	0.155422	0.490496	0.825226	5.38064e-05	0.669805	0.000755001	1.31366
Gm4951	1.61225	2.87137	9.52816	1.52032	1.70337	5.05431	1.46466	2.46168	8.64728	0.452772	0.580228	2.23324	0.000247856	1.78047	0.00155827	3.55807
Gm5512	3.28443	1.62751	2.71796	0.35873	0.2329	8.2513	0.247006	0.233368	6.49909	-0.565929	0.64308	2.44622	0.00102827	3.01215	0.00021385	4.38279
Gm5779	62.963	55.052	54.5206	14.7106	86.5138	51.5809	17.3379	74.7689	66.7174	1.17005	2.33885e-10	0.878823	5.37089e-06	-0.291226	0.0725541	-0.609833
Gm8369	10.6903	10.5661	14.9222	11.4519	9.54905	17.8133	10.9406	13.6687	17.9713	0.0647092	0.855435	0.633039	0.0513697	0.568329	0.0760283	1.11147
Gngt2	7.11139	9.38188	12.7118	8.04194	10.0852	16.4225	7.5377	7.35073	12.6172	0.156082	0.707296	0.871583	0.018723	0.715501	0.0468159	1.40738
Golm1	13.046	13.4927	7.29977	14.6031	13.7878	7.39906	23.0779	16.271	18.3858	-0.265058	0.385067	-0.661993	0.0431493	-0.396934	0.244163	0.396934
Gpr146	65.8358	46.5177	24.9145	67.2899	47.3274	25.2106	62.2903	32.1785	18.6707	-0.648928	0.000252959	-1.48916	2.00255e-13	-0.840232	0.000160091	0.840232
Gpr171	17.2566	12.5417	11.4623	17.171	9.84889	8.31625	21.9693	11.6102	12.5247	-0.695313	0.0265072	-0.79671	0.0128558	-0.101397	0.776884	0.101397
Gpr183	14.3861	27.7198	32.9836	8.9807	21.363	28.4976	11.6477	15.6744	21.0529	0.870088	0.00406756	1.23149	1.76643e-05	0.361407	0.145476	0.696591
Gpr34	35.0858	25.4575	1.38653	21.2218	22.4227	1.57549	31.3455	18.4354	1.30954	-0.439682	0.0726644	-4.38008	3.76895e-21	-3.9404	3.61254e-15	3.9404
Gpr83	13.8278	4.15628	5.72813	15.2911	8.7934	15.3847	10.9973	5.35471	4.90198	-1.1642	0.00340951	-0.61074	0.0936273	0.553456	0.209196	-0.553456
Grap	60.2966	82.186	80.4252	59.6559	99.9699	78.7241	63.8005	103.69	68.8419	0.616111	5.02795e-05	0.316377	0.0462613	-0.299734	0.0395313	-0.626716
Grifin	4.38953	7.42871	6.46278	4.08075	7.56142	8.43884	3.46618	8.13997	6.72914	1.03325	0.043263	0.930115	0.0749222	-0.103134	0.813647	-0.234379
Gstt2	9.03664	13.1475	17.0456	9.83448	13.5194	15.5177	7.20079	13.319	10.8476	0.59863	0.10035	0.762643	0.0322102	0.164012	0.609827	0.301516
Gucy1a3	5.00272	1.38657	0.416426	3.93774	1.11052	0.409901	4.88233	0.780056	0.513972	-2.18041	0.00521611	-3.59615	0.000268109	-1.41574	0.315691	1.41574
Gucy1b3	4.60639	1.88346	0.717898	4.76504	0.629822	1.12422	4.63104	2.24696	0.773494	-1.57287	0.021191	-2.25293	0.00338469	-0.680061	0.494829	0.680061
Gvin1	50.8165	53.2291	47.0121	35.231	34.255	60.8362	40.1307	50.4469	84.8379	0.100183	0.6	0.622428	0.000461889	0.522245	0.00277259	1.01667
Gzmk	0.268255	0.588893	2.52395	0.232369	1.11454	1.09224	0.232369	2.39489	7.224	4.62882	0.0192223	6.07764	9.48802e-05	1.44882	0.061316	2.90825
H1f0	3.00035	4.03637	5.83336	3.1451	3.56616	8.34093	2.2588	2.7735	4.28136	0.431926	0.511669	1.16094	0.0471396	0.729016	0.178425	1.43951
H2-Aa	1.8424	4.55437	3.28679	1.25215	2.55113	6.26018	1.54742	3.53993	24.6314	1.21612	0.0915588	2.73329	1.03242e-06	1.51717	0.000861386	3.01967
H2-Ab1	1.3205	2.28141	2.20925	1.02138	1.87578	4.38612	1.32778	3.55381	15.8372	1.3475	0.131398	2.81529	5.69019e-05	1.46779	0.00839769	2.92722
H2-DMb1	0.558674	0.952767	1.11759	0.494692	0.945385	1.34543	0.465046	0.778573	4.48193	1.42218	0.313248	2.40993	0.0462111	0.987748	0.3006	1.98775
H2-Eb1	1.25503	1.9257	2.10798	0.857655	1.2474	2.73453	0.971864	2.61929	11.7575	0.942337	0.323803	2.44639	0.00102735	1.50406	0.0177422	3.00656
H2-M3	25.5587	31.4664	45.0915	24.567	27.0537	35.8856	22.5957	26.5717	35.0555	0.179726	0.452224	0.654634	0.00332657	0.474908	0.0279484	0.923498
H2-Ob	16.4906	22.1938	40.2281	24.7907	40.4938	49.5812	22.0447	30.6126	43.3193	0.541335	0.025973	1.0838	1.37575e-06	0.542462	0.00829868	1.05859
H2-T10	39.8175	54.4415	91.338	56.6908	64.7421	67.2615	43.3322	47.512	69.9379	0.235023	0.189409	0.710388	2.35827e-05	0.475364	0.00332549	0.92455
H2-T23	240.291	302.55	515.309	255.652	281.72	393.703	216.957	260.464	376.543	0.22559	0.0260075	0.857245	7.58478e-19	0.631655	2.39925e-11	1.23752
H2-T24	14.7124	21.7364	57.6455	14.4565	19.7975	43.2866	15.0062	19.9675	42.0508	0.473404	0.102664	1.70381	1.23684e-12	1.23041	2.8391e-08	2.43609
H2-T9	58.9653	56.6834	88.421	44.016	37.238	79.1979	40.4922	60.4872	72.2334	0.0863737	0.633847	0.747333	6.49018e-06	0.660959	5.08105e-05	1.29504
Habp4	9.4168	13.6879	20.3584	12.9104	21.1601	22.6725	10.1124	18.2147	18.3375	0.705427	0.0296905	0.934757	0.00289683	0.22933	0.410513	0.432147
Hebp1	0.330857	1.90392	2.66788	0.944962	2.00785	1.52293	0.232369	3.19986	0.976303	2.60009	0.0259488	2.40987	0.0462169	-0.19022	0.80839	-0.412612
Herpud1	40.7452	40.8104	26.7959	40.6524	37.3451	26.7526	40.3629	35.3846	24.2613	-0.130174	0.516383	-0.636793	0.0034787	-0.506619	0.0222948	0.506619
Hipk2	11.5331	5.29269	4.57221	7.59191	5.43402	3.21492	8.39455	3.51237	3.15943	-1.01114	0.0278949	-1.32756	0.00647282	-0.316423	0.582615	0.316423
Hist2h2bb	0.305381	0.353264	8.8257	0.349761	4.77929	7.88621	0.232369	9.03191	10.4256	6.39391	1.23805e-05	7.36033	1.09591e-09	0.966415	0.0372075	1.91395
Hvcn1	8.1592	10.3398	17.9062	7.97669	11.9446	23.1224	8.87875	10.9028	15.5256	0.378554	0.325392	1.19115	0.000427091	0.812595	0.0102297	1.60109
I830012O16Rik	1.95605	2.26155	9.76896	1.45166	1.55183	4.29498	1.55214	1.74447	5.85708	0.235994	0.780971	1.97207	0.00196455	1.73608	0.00442273	3.47305
Icmt	5.53342	4.98695	7.60229	9.61936	4.65647	8.13153	5.57639	0.611334	5.41912	-1.00856	0.0507574	-0.0591047	0.893672	0.949459	0.0689459	-0.949459
Id2	58.172	137.439	81.6223	51.5683	134.802	51.3908	92.3887	121.972	50.13	0.943239	2.0398e-11	-0.135934	0.403801	-1.07917	5.53783e-14	-1.77115
Ier2	69.9404	59.9322	51.7911	88.4491	64.017	51.3495	80.4569	58.8427	44.185	-0.398207	0.0114977	-0.686866	3.11513e-05	-0.288659	0.0969625	0.288659
Ifi27l2a	148.478	235.447	462.833	142.748	162.319	299.835	124.109	180.379	265.452	0.455004	8.66959e-05	1.31366	2.0011e-34	0.858652	3.80427e-17	1.69185
Ifi44l	0.966663	2.02415	3.52287	1.44406	0.897401	1.47671	0.976433	3.33756	5.06415	0.942337	0.323803	1.69035	0.0459303	0.748013	0.299171	1.48498
Ifi47	159.729	205.295	314.958	168.998	154.964	234.308	162.237	164.87	245.925	0.0765363	0.503585	0.70175	7.68062e-11	0.625213	4.68658e-09	1.22385
Ifitm2	0.469317	2.00823	2.91812	0.472985	0.845507	0.830002	0.232369	0.232369	1.01195	4.23311	0.0425635	4.96542	0.00841669	0.732312	0.461893	1.46928
Ifngr1	199.214	163.195	153.78	172.341	120.018	88.7058	178.244	89.3662	105.295	-0.581407	1.02023e-06	-0.651294	6.2535e-08	-0.0698869	0.585924	0.0698869
Igfbp4	141.714	100.698	47.9092	160.614	137.333	67.914	212.773	118.774	68.1583	-0.550697	5.29652e-06	-1.47898	3.52388e-27	-0.928285	1.9863e-10	0.928285
Igtp	145.353	211.009	366.374	148.041	127.038	239.217	115.919	118.868	266.949	0.140037	0.245243	1.09832	1.42755e-23	0.958281	6.08475e-19	1.89042
Iigp1	5.38133	28.77	111.586	9.47288	8.63806	70.9367	5.89381	15.4145	94.9305	1.37869	0.000145941	3.79314	7.61183e-53	2.41445	1.14954e-33	4.80547
Ikzf3	22.5287	51.3144	72.2083	26.458	54.7784	85.8075	18.0798	62.9845	73.532	1.31291	4.29226e-10	1.79709	6.49686e-20	0.484175	0.0026291	0.941276
Il2ra	10.4316	5.49855	2.15446	7.4707	3.2652	1.0109	4.66473	5.11797	1.78665	-0.771154	0.120031	-2.09397	0.000774586	-1.32282	0.0614702	1.32282
Il4ra	141.023	78.7866	73.0118	128.29	72.2958	63.6924	121.263	57.8092	55.4687	-0.919266	5.08438e-11	-1.01473	1.02406e-12	-0.0954601	0.551106	0.0954601
Il7r	144.559	241.261	284.685	163.77	238.089	307.95	210.346	241.216	352.641	0.45228	2.99281e-05	0.874132	6.60874e-17	0.421852	2.37533e-05	0.815695
Impdh2	61.0788	46.6794	37.2142	61.6887	45.4734	34.6794	60.8807	46.0934	39.746	-0.434395	0.013591	-0.70782	0.000121382	-0.273425	0.162427	0.273425
Inppl1	0.649156	5.79356	8.18503	0.738946	5.06113	4.02752	0.517794	0.697653	4.02939	1.92258	0.017821	2.35949	0.00180973	0.436907	0.423484	0.851944
Insl3	9.75997	12.573	24.2645	10.056	10.8673	18.05	6.76062	10.1243	16.1465	0.311079	0.407068	1.1057	0.000825494	0.794621	0.0111078	1.56514
Ipcef1	27.0231	31.1542	45.2604	29.4514	33.1642	47.8714	26.8034	35.2008	52.7984	0.234126	0.298237	0.821253	7.05349e-05	0.587127	0.00311723	1.1476
Irf1	67.1054	98.8293	171.028	68.9903	81.7067	128.423	61.8327	77.2797	130.82	0.36182	0.0178088	1.12509	6.07842e-16	0.763268	7.6625e-09	1.50023
Irf6	3.02616	4.76922	6.28494	2.90677	8.84257	13.8723	2.54005	6.26051	12.2904	1.11799	0.0438537	1.81879	0.000238826	0.700796	0.0865333	1.37887
Irf7	8.39265	13.5255	32.4328	8.90233	10.9619	18.9392	4.11261	3.08356	22.9163	0.39267	0.346856	1.81632	4.27088e-08	1.42365	4.23036e-06	2.82575
Irf8	0.449578	0.871757	2.05555	0.491063	0.641076	2.15997	0.624743	0.717151	1.78295	1.42219	0.313245	2.40988	0.0462159	0.987688	0.300629	1.98769
Irf9	14.3701	32.5295	58.1789	17.2367	25.5696	47.4987	14.2985	18.9279	43.0836	0.771663	0.00480681	1.72118	3.71632e-13	0.949518	5.46279e-06	1.87357
Irgm1	16.8375	51.8802	147.351	17.1562	27.4771	91.7027	16.5026	28.122	117.89	1.04662	2.33642e-05	2.81024	1.27049e-48	1.76362	3.10439e-27	3.50194
Irgm2	27.035	36.7661	76.7574	29.746	23.9618	55.6171	24.3666	24.1836	64.0345	0.0496337	0.832166	1.28776	4.00748e-11	1.23813	1.35882e-10	2.45079
Isg15	6.03866	9.97992	14.1646	5.5181	5.51039	7.87478	3.98581	11.7982	11.4934	0.781207	0.0796199	1.04413	0.0147804	0.262925	0.482677	0.499964
Isoc2a	13.7104	10.6787	11.5727	13.6035	7.71264	11.9349	13.6056	6.11261	12.6812	-0.764266	0.0354218	-0.174603	0.597889	0.589663	0.115292	-0.589663
Itga7	2.70416	4.3618	6.70607	2.33063	5.16229	11.768	2.65972	2.56494	5.91293	0.55563	0.388758	1.6312	0.00253801	1.07557	0.0282469	2.13446
Itgb3	46.3386	36.3402	26.8175	44.3573	46.6531	37.4622	48.5065	35.7488	24.3818	-0.243455	0.206705	-0.651097	0.00158658	-0.407642	0.0559582	0.407642
Itih5	7.82477	1.5442	1.55274	5.7318	3.42462	2.8344	4.61549	2.29022	1.48474	-1.43863	0.0157194	-1.62885	0.00843267	-0.190225	0.808385	0.190225
Itm2a	33.0887	31.4041	48.5966	40.3847	48.7631	72.5286	32.3615	55.7378	53.8239	0.353151	0.0761814	0.752154	6.59562e-05	0.399003	0.0251475	0.770972
Jak3	15.9162	20.49	32.9114	12.8283	15.0462	26.9243	9.78084	15.2293	21.5645	0.337305	0.282419	1.07617	0.000119144	0.738866	0.00509642	1.45256
Kcnf1	0.273789	0.613394	1.58656	0.298966	0.98661	1.41783	0.586796	2.63595	3.62719	2.12811	0.0915369	2.62677	0.0243128	0.498658	0.542297	0.984085
Kcnip2	6.77538	14.7363	12.0122	15.5883	15.151	19.5875	10.709	29.1891	37.7554	0.772479	0.0132599	1.04644	0.000478191	0.273958	0.298061	0.520598
Khdrbs3	3.18706	3.43881	7.39683	5.33456	8.38131	6.53752	1.03415	5.50239	9.42195	0.885716	0.124588	1.34519	0.0120968	0.459478	0.318036	0.895577
Kit	0.329993	1.74592	2.18108	0.355331	1.05511	0.269599	0.362848	2.6039	0.329822	5.19419	0.00415514	3.71114	0.095414	-1.48304	0.156366	-3.06801
Klhl6	81.3161	105.655	124.432	96.836	124.937	145.615	86.7883	119.918	136.51	0.385927	0.00461641	0.626797	2.33731e-06	0.24087	0.0561545	0.454428
Lag3	0.712415	1.55355	1.79125	0.985429	1.20143	1.167	0.470621	1.1542	4.68026	0.924569	0.420047	1.92192	0.0492974	0.997355	0.232376	1.99735
Larp1	42.9151	34.7746	28.3761	42.7387	30.2132	25.567	37.7346	28.8271	22.9597	-0.418753	0.0442795	-0.678816	0.00182859	-0.260064	0.261537	0.260064
Ldhb	19.8181	25.6167	30.8377	22.3196	25.3248	36.6922	16.0438	21.0155	25.5572	0.291518	0.267071	0.702551	0.00447311	0.411033	0.0804372	0.795697
Lgals3bp	15.2902	18.9121	30.0434	12.6184	13.0861	20.8919	13.278	10.8613	22.7656	0.0486624	0.879612	0.856584	0.00247291	0.807922	0.00388068	1.59111
Lgmn	3.52393	6.96927	5.38998	4.4784	6.15476	15.9948	3.80033	7.02175	13.8971	0.709408	0.17056	1.53903	0.000669681	0.829618	0.0381712	1.63697
Litaf	2.07472	1.36667	3.78029	0.816465	1.79731	4.04061	1.59124	2.63001	6.73155	0.235988	0.780975	1.56115	0.0222504	1.32516	0.0426737	2.64709
Lnx2	7.75332	13.1004	11.7714	13.4391	17.0571	13.8078	7.83516	18.5486	12.4662	0.73378	0.030098	0.395617	0.270717	-0.338163	0.286476	-0.704945
Lpar5	2.41204	0.719585	3.64833	3.22527	2.46022	1.35165	5.11783	0.232438	0.233124	-1.70167	0.0443384	-0.969437	0.197733	0.732234	0.46194	-0.732234
Lpxn	15.2289	27.1091	28.3619	20.9723	18.2884	22.9702	24.7168	32.9813	48.4371	0.333859	0.190278	0.705028	0.00349975	0.371168	0.103855	0.715123
Lta	68.1091	27.1114	7.80678	54.0444	15.8074	8.64844	51.0464	25.8473	10.4882	-1.34421	9.63662e-11	-2.66499	4.3527e-25	-1.32078	3.23091e-05	1.32078
Lxn	4.81856	2.67184	2.88039	6.19258	0.582858	2.65222	4.13635	0.948344	3.37656	-1.57283	0.0211944	-0.719059	0.226237	0.853767	0.268192	-0.853767
Ly6c2	33.9214	69.6072	195.888	8.49667	1.45158	60.3183	31.396	1.93051	53.9192	-0.0209534	0.932751	2.08801	2.06382e-30	2.10897	4.94069e-31	4.15336
Ly6e	59.0866	55.9639	55.7101	43.249	16.3075	44.2326	64.1779	11.7067	20.7441	-1.00175	5.81051e-07	-0.44923	0.0151849	0.552525	0.0100443	-0.552525
Lypd6b	3.77631	1.27335	6.78999	3.93327	1.22944	7.94651	3.92861	0.792493	5.3139	-1.96081	0.0155047	0.736475	0.1547	2.69728	0.000162268	-0.487369
Lyst	47.6258	35.2929	30.411	45.7595	30.6534	20.6931	38.8955	25.7785	17.7452	-0.550639	0.00752097	-0.937867	1.99995e-05	-0.387228	0.104714	0.387228
Lyz1	0.504483	0.252849	1.19256	0.272143	0.435074	2.23286	0.708638	10.9158	2.86124	2.34623	0.00970073	1.51655	0.146872	-0.829679	0.239228	-1.70415
Maf	0.910986	1.63652	1.69228	1.23271	1.47196	1.51214	0.855528	1.53738	5.72333	0.687176	0.490226	1.69043	0.0459201	1.00325	0.182162	2.00325
Magohb	2.46638	5.20593	6.90801	3.25079	4.35505	6.81104	3.22024	6.07733	6.76509	0.873529	0.152972	1.3815	0.0142294	0.507968	0.294608	0.993395
Map6	6.52286	1.93035	0.275763	6.73176	2.55214	0.362078	4.2249	3.32124	0.480402	-1.17288	0.0448246	-6.77227	6.79746e-07	-5.59939	0.000960123	5.59939
Matk	9.45904	9.64099	22.3361	8.54795	11.1494	17.8089	7.87962	9.72074	18.7685	0.232619	0.547824	1.18449	0.00036433	0.951873	0.00280815	1.88032
Mbd2	124.565	96.3699	68.259	105.107	65.6983	83.8415	134.336	91.1332	72.8914	-0.545232	6.50796e-05	-0.686398	8.91289e-07	-0.141166	0.344774	0.141166
Mbnl3	13.2449	8.55708	2.47356	14.3222	12.4625	3.15874	14.651	10.5769	3.02079	-0.410189	0.231181	-2.36097	7.37588e-07	-1.95078	0.000129554	1.95078
MCL1	306.868	230.991	195.791	323.578	279.52	215.76	286.727	244.591	196.997	-0.29908	0.00265525	-0.584056	1.23284e-08	-0.284975	0.00670138	0.284975
Mettl23	55.1082	30.2762	32.1271	38.873	49.7647	28.351	51.4808	38.811	28.2725	-0.304556	0.110941	-0.71236	0.000488191	-0.407805	0.0558603	0.407805
Mib2	8.60175	4.2274	7.30225	9.14036	6.398	9.12147	8.37728	3.42345	12.6823	-1.01035	0.0339804	0.164196	0.676267	1.17454	0.0113809	-0.688608
Mina	16.0577	16.6827	9.01316	21.9844	8.19809	8.83858	26.2442	7.04247	7.32204	-1.01596	0.0010583	-1.34284	4.51921e-05	-0.326884	0.399254	0.326884
Mnda	13.8711	30.0173	37.3514	15.6981	28.1341	23.2805	14.9359	24.5446	21.5784	0.861068	0.00141599	0.870492	0.00128766	0.00942425	0.967983	-0.00806318
Mov10	28.4299	26.5876	13.9051	28.5091	15.6917	13.1373	22.1409	18.1404	9.87595	-0.391945	0.122946	-1.08344	0.000149193	-0.691496	0.0226454	0.691496
Mri1	13.9293	18.1245	6.69837	13.2278	12.5716	5.44769	17.7222	9.82099	6.39261	-0.15356	0.628995	-1.30664	0.000731551	-1.15308	0.00356678	1.15308
Mrps10	5.78645	5.96966	3.98154	5.36794	5.70368	0.232697	7.45497	0.235926	2.76785	-0.597853	0.259882	-1.33472	0.0271092	-0.736871	0.268306	0.736871
Ms4a6d	37.2486	57.4173	39.3693	31.9891	45.3733	13.4421	33.219	39.5946	12.1384	0.456768	0.0214401	-0.664294	0.0051087	-1.12106	3.75236e-07	-0.269795
Msgn1	0.348627	2.92738	0.450717	0.419293	3.66187	0.928781	2.023	4.02716	0.656305	2.3464	0.00969489	0.00694261	0.995847	-2.33946	0.00994832	-4.79889
Mtif3	2.88091	1.23302	2.40744	2.40818	1.33553	2.39607	4.63792	0.232372	2.75561	-2.24885	0.0151893	-0.497191	0.474424	1.75166	0.0821295	-1.75166
Mtmr3	61.5714	53.377	32.0536	58.8648	66.9592	33.2601	58.6293	55.0362	32.4902	-0.0601905	0.720507	-0.883362	3.7259e-06	-0.823172	1.83236e-05	0.823172
Mvd	12.7136	11.8682	7.47549	12.6964	10.1068	6.46942	11.088	9.53936	4.63877	-0.228142	0.51816	-1.02533	0.0114122	-0.797187	0.0575006	0.797187
Myb	2.54111	1.73801	4.14079	2.61241	1.73589	5.44939	1.14343	3.68596	10.9569	0.169055	0.817545	1.50027	0.0108052	1.33122	0.019489	2.65314
Myc	40.0421	28.5528	18.9137	31.1589	27.4352	13.6264	37.2768	32.3232	14.1502	-0.314993	0.14814	-1.19027	2.23358e-06	-0.875279	0.000897764	0.875279
Myo6	52.7025	19.8087	5.85167	36.6968	26.7555	5.19267	36.8653	13.6302	4.40329	-1.07569	2.47352e-06	-3.06069	3.61543e-22	-1.98499	1.31486e-07	1.98499
Mzb1	0.412721	0.68031	0.684003	0.425686	0.478675	0.952603	0.386692	0.987098	6.52707	3.68597	0.097688	5.79292	0.000412076	2.10695	0.0265042	4.27687
Nabp1	46.7433	38.8931	24.1858	41.3346	43.6895	23.8789	46.442	35.5944	18.0272	-0.190816	0.326163	-1.01262	4.97546e-06	-0.821809	0.000307247	0.821809
Naf1	5.64406	3.39904	2.24761	5.14616	2.95076	1.83736	5.40421	3.59846	1.51468	-0.688705	0.227132	-1.38324	0.0318352	-0.694539	0.33545	0.694539
Nat10	10.9189	9.26395	8.05305	8.56566	8.05402	4.37715	11.3271	8.29875	3.88647	-0.328222	0.400743	-0.93973	0.0307111	-0.611507	0.181775	0.611507
Nat9	3.44541	6.42038	8.99173	4.22598	4.2283	7.53527	3.33268	5.61069	5.6929	0.649592	0.254882	1.19566	0.0221838	0.546068	0.242178	1.06963
Ncoa3	70.2774	59.9266	39.8327	68.2778	59.6783	42.4085	64.7325	58.964	38.3825	-0.20115	0.218275	-0.750181	2.45156e-05	-0.549031	0.00262617	0.549031
Ndrg3	46.1675	49.5308	74.2264	50.8026	56.1358	68.1141	41.1375	60.3097	73.4377	0.246591	0.170385	0.646668	0.00014937	0.400077	0.0147242	0.77323
Ndufs5	27.8007	35.1685	20.4124	44.9834	26.0385	26.0317	48.7452	21.206	22.2757	-0.591753	0.00601501	-0.833919	0.000208291	-0.242165	0.324482	0.242165
Neb	3.71386	6.78914	1.10556	2.82815	5.58145	0.654942	3.24889	4.67832	0.714783	0.817852	0.140356	-1.67587	0.0479448	-2.49372	0.00070426	0.0100167
Neurl3	19.7258	20.4537	21.4805	16.3976	20.1181	29.2915	19.6212	37.707	53.2567	0.456751	0.078984	0.885221	0.000286906	0.42847	0.0581874	0.829569
Nfkbiz	21.3322	16.7778	11.874	19.7495	13.9552	10.5486	17.5183	12.779	9.55822	-0.44157	0.132226	-0.827642	0.00840794	-0.386072	0.25125	0.386072
Nkg7	0.301666	0.519227	1.01327	0.288078	0.573072	7.49677	1.74443	4.58227	3.69789	1.70664	0.0908512	2.49713	0.00489256	0.790491	0.234615	1.5681
Nme4	6.47625	7.655	11.4581	5.2262	6.68686	12.604	5.90392	9.07609	9.63998	0.473699	0.298554	1.00044	0.0169917	0.526741	0.172153	1.02924
Npm3	53.7813	51.5496	36.2586	50.8128	47.3864	30.0744	58.2807	41.6649	31.4664	-0.228803	0.202931	-0.740551	0.000145722	-0.511748	0.0109485	0.511748
Nr4a1	3.07902	13.4271	8.8843	13.9558	11.161	6.72775	3.71325	21.3135	9.94746	1.07389	0.00398162	0.313694	0.460271	-0.760197	0.031935	-1.55161
Nsg2	27.049	9.02303	58.4971	58.2621	13.7158	34.7312	31.049	16.3429	32.1313	-1.58752	8.06342e-10	0.115283	0.561204	1.7028	2.04648e-11	-1.36443
Nt5c2	3.60061	1.78011	1.21124	3.92759	3.1411	1.10492	3.33361	1.98178	1.14601	-0.659162	0.33174	-1.8112	0.0287707	-1.15203	0.211374	1.15203
Nt5e	30.261	9.164	3.32369	18.0103	21.211	11.9984	21.6366	7.26325	10.2154	-0.936443	0.00142602	-1.47189	4.97782e-06	-0.535445	0.152951	0.535445
Oasl2	0.718163	1.26913	7.93699	0.996089	0.250061	2.96995	1.17459	0.26851	2.34687	-1.45791	0.300556	2.06329	0.00947754	3.5212	0.000442299	2.72085
Olfr1033	33.3469	23.9025	34.5065	35.1404	21.6845	32.7761	31.3191	16.5958	23.5273	-0.670335	0.00514991	-0.098267	0.654966	0.572068	0.0188552	-0.572068
Osm	16.8112	15.9481	9.16862	15.5526	16.9852	7.63615	17.8855	14.4192	8.31365	-0.13715	0.646284	-1.01631	0.00342119	-0.87916	0.0130272	0.87916
P2rx7	0.433082	1.08924	1.93038	0.734373	1.67791	2.55694	0.369739	1.77914	2.98956	2.12818	0.0915256	2.81527	0.0127352	0.68709	0.386202	1.36516
P2ry10	60.538	36.2579	26.6383	61.6915	35.9811	21.1108	60.7096	29.9253	34.5464	-0.869773	3.67944e-06	-1.13933	7.04823e-09	-0.269552	0.227989	0.269552
Parp9	13.1319	17.7752	34.5482	12.2788	14.0137	27.4222	12.6943	14.0142	27.1572	0.254757	0.428815	1.23149	8.22174e-06	0.976732	0.000215575	1.9289
Pdcd1	1.00869	3.53202	4.79403	0.861386	1.39445	1.01964	0.891424	2.07417	7.93848	1.15909	0.20846	2.16909	0.00549284	1.01001	0.115068	2.01001
Pde7a	7.45825	10.024	12.3873	6.57142	9.54404	12.0419	6.41505	11.9448	11.2751	0.653895	0.109977	0.809715	0.0431182	0.155819	0.663172	0.285102
Pdia4	58.3099	34.2976	27.8601	47.1828	32.8703	27.739	46.3598	28.434	25.0461	-0.687501	0.000551445	-0.889928	1.60755e-05	-0.202427	0.375523	0.202427
Pdk1	40.7685	21.9789	29.0227	45.5983	6.72083	6.19562	24.558	6.02256	21.1738	-1.69297	2.32079e-10	-0.990431	3.57256e-05	0.702541	0.0249648	-0.702541
Pdlim4	60.2989	26.0542	17.4692	71.6148	39.4319	15.8232	49.8724	32.2054	17.1971	-0.925981	1.1589e-06	-1.85268	5.53931e-17	-0.926698	0.000265886	0.926698
Pfdn4	4.58298	1.16247	1.37738	4.4424	2.49502	5.82562	12.2046	6.4958	6.82984	-1.22694	0.0250856	-0.571826	0.246074	0.65511	0.277914	-0.65511
Pgpep1l	25.8713	25.6345	15.3249	24.2661	16.6252	11.0463	34.3486	28.7341	14.4301	-0.242016	0.315679	-1.05994	0.000126867	-0.817927	0.00432192	0.817927
Phc3	40.0929	27.6293	16.3098	30.765	22.8671	11.6231	36.3404	29.6723	9.53009	-0.420982	0.0583489	-1.48235	2.20679e-08	-1.06136	0.000170849	1.06136
Phf11b	10.3347	14.9849	19.7541	10.1175	10.4614	14.5772	11.435	10.2137	17.3589	0.154454	0.668347	0.750528	0.0222341	0.596074	0.0615742	1.16723
Phf11c	10.6835	12.1752	19.3157	10.5441	10.5038	16.2911	10.3873	11.6877	17.0553	0.108927	0.760795	0.705011	0.0304682	0.596084	0.0615698	1.16724
Phyh	13.9649	34.2367	29.8986	13.0287	36.6113	28.6977	24.2881	35.109	26.3197	1.03325	3.08285e-05	0.742406	0.00437455	-0.290841	0.187163	-0.609371
Pianp	0.232369	5.66107	6.58033	5.45544	4.28239	5.58263	0.232369	8.07952	5.25534	1.79453	0.00607725	1.82161	0.00531403	0.0270813	0.955149	0.0270813
Pisd-ps1	63.8857	34.5645	27.611	36.3736	18.551	0.232369	33.4193	0.538862	0.232369	-1.29144	2.4218e-08	-2.23489	1.58271e-16	-0.943443	0.00450056	0.943443
Pisd-ps2	28.1321	12.0835	17.3719	19.8491	11.2827	26.0029	21.1779	13.5366	19.0335	-0.915987	0.00187548	-0.14651	0.574808	0.769477	0.0108351	-0.769477
Pisd-ps3	21.6714	0.412553	18.8228	22.1063	14.0903	0.232369	34.3549	36.389	0.232369	-0.659841	0.013414	-2.02113	1.68672e-09	-1.36129	0.000259355	1.36129
Pja1	52.7484	24.1045	27.0819	53.3262	25.0575	21.5286	49.6348	23.6135	25.3071	-1.11356	1.08529e-07	-1.06682	3.36394e-07	0.046744	0.850203	-0.046744
Pkp4	9.3072	10.7441	4.80531	10.4605	7.95745	3.82167	6.65901	4.9933	3.17132	-0.134315	0.744063	-1.09743	0.023959	-0.963112	0.0519982	0.963112
Plekho1	18.3349	15.6737	11.222	26.4571	11.6497	15.0742	19.6652	13.3632	13.206	-0.659937	0.0241241	-0.704487	0.0173944	-0.0445498	0.892222	0.0445498
Plp2	86.4349	71.9474	52.3198	74.9384	57.7642	45.6399	68.877	53.0552	45.043	-0.349482	0.0275907	-0.677774	4.94175e-05	-0.328292	0.0605718	0.328292
Pop5	47.0716	40.0234	35.7741	65.7099	31.1575	33.4832	64.6125	37.7586	28.6022	-0.726339	9.82315e-05	-0.852287	8.07931e-06	-0.125948	0.552892	0.125948
Pou2af1	1.20614	1.9483	2.63733	1.28094	1.37436	2.35959	0.851565	1.89228	4.6256	0.687176	0.490226	1.69038	0.0459262	1.00321	0.182182	2.00321
Pou6f1	21.8721	28.8574	37.1348	29.7047	25.5102	33.1995	28.3761	39.8452	51.9125	0.227639	0.320333	0.615682	0.0044863	0.388043	0.0626374	0.748925
Ppic	4.83487	4.8178	3.23584	4.49682	0.583938	0.612042	9.49397	1.60345	3.48333	-1.17302	0.0447984	-1.33472	0.0271101	-0.161695	0.825372	0.161695
Ppm1h	29.1125	17.9478	21.6392	34.6081	18.6918	26.6068	28.4296	19.1065	21.3404	-0.73412	0.00336071	-0.385814	0.10479	0.348306	0.191173	-0.348306
Ppm1j	13.8314	10.742	6.31475	11.937	9.28841	4.60976	16.7401	4.77572	5.09046	-0.79812	0.0271757	-1.4096	0.000457913	-0.611478	0.181796	0.611478
Ppp1r18	18.4651	28.2297	18.9967	0.232369	13.695	21.3282	44.7421	63.2742	12.3677	0.714285	0.00253684	-0.269341	0.332366	-0.983626	7.00785e-05	-1.18191
Prrg4	2.74026	1.6871	1.1924	3.36665	1.12244	0.25629	2.39199	1.75647	0.298939	-0.679733	0.391325	-2.80144	0.013269	-2.12171	0.0927054	2.12171
Prrt2	7.22002	8.83742	10.8193	7.65311	9.47538	11.9962	7.41214	12.6553	14.7158	0.471903	0.241471	0.791523	0.0391307	0.31962	0.36588	0.613351
Psmb9	87.1779	132.531	208.239	93.8419	104.493	144.795	89.4915	85.9538	139.369	0.238768	0.0831564	0.871838	1.03283e-11	0.63307	3.32918e-07	1.24019
Pttg1	36.1835	4.32038	3.84944	36.383	5.36453	4.07368	22.1644	5.96222	5.07201	-2.65384	4.80627e-15	-2.83085	6.978e-16	-0.177005	0.744906	0.177005
Pydc3	21.5821	17.5831	36.9113	22.6883	16.871	55.7976	23.6962	17.1381	59.1639	-0.426689	0.116732	1.14551	8.15695e-08	1.57219	5.0203e-12	1.85822
Pydc4	3.30083	7.19438	15.7798	2.2287	6.14999	9.87261	3.19568	7.66346	9.76029	1.35433	0.0163208	2.15421	1.33362e-05	0.799883	0.0417694	1.57749
Qpct	2.52714	1.71528	0.324535	3.34897	2.54452	0.491624	3.41317	3.12793	1.72784	-0.186041	0.787523	-2.07419	0.0292438	-1.88815	0.0537096	1.88815
Qrfp	3.68843	1.46755	0.659636	3.00119	1.87108	1.1237	4.97897	1.34821	1.05091	-1.56509	0.0390608	-1.93498	0.0170719	-0.369889	0.724148	0.369889
Rab6b	22.0605	0.525464	0.40151	0.277306	0.255271	0.39979	14.4142	0.559856	0.450761	-4.08021	1.29995e-09	-7.76619	2.57446e-12	-3.68597	0.0983204	3.68597
Rabgap1l	26.6607	30.7546	14.3591	53.3745	39.6865	21.6721	22.523	33.9737	20.186	0.00873518	0.96708	-0.868906	0.000372162	-0.877641	0.000307063	0.832425
Ralgds	5.00884	5.46991	1.15576	6.24945	5.17036	2.10956	7.24103	7.9242	1.77045	-0.0196461	0.967454	-1.80678	0.00572547	-1.78714	0.00630731	1.78714
Rapgef4	13.3879	17.5981	26.5116	14.2049	25.2687	33.3666	15.8322	24.032	26.5969	0.618161	0.0309287	1.0214	0.000152075	0.403241	0.0973717	0.780096
Rasa1	39.9975	23.9277	19.8607	33.7375	22.9999	22.3729	39.3128	23.148	22.72	-0.709499	0.0017827	-0.788836	0.000640377	-0.0793371	0.757983	0.0793371
Rb1	17.1002	19.8481	25.757	18.3052	23.7303	30.425	16.1729	22.5472	29.7311	0.372877	0.175426	0.759559	0.00346182	0.386682	0.112856	0.746858
Rbl1	12.0629	14.3793	20.3271	12.5051	13.3212	18.319	12.7854	13.6228	19.8938	0.0894439	0.786879	0.615383	0.0435557	0.525939	0.0789925	1.02637
Rcn1	16.8261	10.7303	5.56462	20.608	14.0216	7.25659	19.8989	12.0187	7.48373	-0.665772	0.0299855	-1.5207	1.86619e-05	-0.854929	0.0305602	0.854929
Rcsd1	81.0861	67.5221	49.2972	70.5022	60.9081	52.5087	67.0628	55.4996	36.1442	-0.270911	0.0904389	-0.658464	0.000106614	-0.387553	0.0277316	0.387553
Rexo2	145.058	107.698	74.0951	129.125	98.7759	78.9249	131.018	105.223	61.8951	-0.396344	0.0021074	-0.905969	5.75126e-11	-0.509625	0.000437621	0.509625
Rgcc	66.0026	15.5369	10.5402	98.4302	18.8382	10.113	89.9521	35.1557	11.0698	-1.87638	9.71662e-23	-2.97422	7.06969e-39	-1.09783	0.000306899	1.09783
Rgs1	62.8804	20.2467	6.12191	56.7279	10.7359	2.81429	62.5303	11.9017	5.48447	-2.10515	3.1562e-20	-3.68541	7.54241e-36	-1.58026	0.000143041	1.58026
Rgs10	72.7813	88.9608	114.498	95.0364	113.974	118.156	94.1173	148.518	168.769	0.406105	0.00292197	0.622335	3.06672e-06	0.216229	0.0870836	0.404256
Rhob	9.61482	45.9496	16.61	14.1187	38.575	14.8846	20.4484	31.0844	9.50225	1.37549	4.52445e-08	-0.0595012	0.851455	-1.43499	1.67223e-08	-2.71453
Rhoc	4.51701	2.97996	1.19369	4.01535	1.65297	1.04834	5.19138	0.481111	1.36772	-1.47444	0.0336029	-2.15455	0.00584931	-0.680104	0.494803	0.680104
Rmrp	1.44501	4.24817	3.60646	1.96546	13.9229	1.44304	2.30763	8.35175	16.2355	2.32105	0.000104729	2.04228	0.00117876	-0.278773	0.511764	-0.586895
Rnf135	1.53092	1.86489	4.67349	1.6436	1.84816	5.3821	1.28178	1.62109	4.12824	0.236029	0.78094	1.46269	0.035145	1.22666	0.0649841	2.44905
Rnf157	0.943495	6.6222	7.25463	2.76304	0.776233	4.194	0.816525	2.92258	8.85638	1.09244	0.13765	1.97229	0.00196216	0.879852	0.0957623	1.74235
Rpa1	47.9115	57.2085	67.3376	55.1651	66.8662	86.9631	54.3805	73.9902	91.4533	0.314745	0.0621919	0.649571	5.89788e-05	0.334826	0.0298982	0.642107
Rprl3	0.232369	1.99141	0.232369	0.232369	1.27698	0.86874	1.3232	0.232369	8.64418	1.42219	0.313243	3.13147	0.0034598	1.70928	0.0433575	3.44624
Rtp4	4.08579	8.50153	28.4674	3.50369	5.23396	17.0368	2.80426	4.41214	21.7674	0.682494	0.20805	2.59593	5.00631e-11	1.91344	5.29453e-08	3.8096
S100a4	0.554243	0.469241	1.66532	0.347374	0.584035	1.51777	0.232369	4.18347	2.98967	2.12809	0.0915393	2.62674	0.0243142	0.498649	0.542304	0.984076
S100a6	0.580638	1.11433	0.847991	0.430002	0.568109	2.99354	1.0738	3.73019	6.37944	1.48989	0.154304	2.23802	0.0157861	0.748128	0.299098	1.48509
S100a8	3.31684	0.232369	4.0242	0.232369	0.232369	0.232369	10.5977	40.7863	17.1768	1.51859	0.000301451	0.58685	0.233802	-0.931739	0.0145424	-1.89697
S100a9	2.75849	0.232369	3.86046	0.232369	0.354131	0.232369	10.1501	29.3344	18.8877	1.12724	0.0152545	0.822776	0.0937283	-0.304462	0.452206	-0.638881
Samd9l	36.0329	37.0813	50.9659	35.7887	35.28	56.1334	40.1954	38.5248	68.1687	-0.0327876	0.873055	0.650878	0.000468679	0.683666	0.000244554	1.26195
Samhd1	167.352	239.371	310.41	140.509	205.17	252.682	146.09	144.554	203.944	0.355643	0.00178941	0.762199	3.72538e-12	0.406556	0.000114718	0.787514
Scml4	27.8389	37.4761	51.4487	31.186	41.7759	56.9576	27.0303	42.7206	48.6528	0.48399	0.0232012	0.874685	1.46539e-05	0.390695	0.0365184	0.754578
Scpep1	1.82908	4.62321	3.79284	2.31883	4.72616	4.57534	2.20212	6.18228	4.24135	1.37093	0.0334242	1.10181	0.103656	-0.269118	0.615401	-0.568678
Sec24a	29.523	23.939	19.5373	25.583	24.6454	16.9721	27.3002	20.0628	14.2655	-0.285685	0.242097	-0.693537	0.00811401	-0.407851	0.135691	0.407851
Serinc5	7.84318	8.90929	11.8	9.75921	12.6411	15.6806	7.19142	13.8045	15.412	0.503532	0.181735	0.786038	0.0296269	0.282506	0.393801	0.538846
Sfn	27.8034	21.8807	19.3589	30.2832	18.3946	19.3183	29.5654	15.7248	15.6014	-0.670242	0.00803502	-0.695378	0.00641243	-0.0251367	0.929237	0.0251367
Sft2d2	87.8777	49.7012	39.0547	78.9828	46.7771	38.145	77.0676	39.3772	32.0158	-0.862331	2.33072e-07	-1.15411	4.2e-11	-0.29178	0.139621	0.29178
Sgk1	4.88743	12.7902	8.2626	9.20469	24.1892	16.8464	9.31074	18.1196	14.0885	1.23228	0.000399139	0.765307	0.0425278	-0.46697	0.128131	-0.962927
Sgms1	8.48565	11.5594	23.6796	6.73668	7.89871	19.0016	9.05255	7.51169	15.9022	0.201227	0.618623	1.29906	0.000125207	1.09784	0.000768076	2.17312
Sgpp1	36.9367	24.4104	23.825	39.3254	29.2945	26.1612	37.5946	24.2784	24.0986	-0.584711	0.00838341	-0.614767	0.00603274	-0.0300561	0.902171	0.0300561
Sh3bp1	125.845	116.217	76.8001	122.399	93.3137	64.3838	135.333	83.2051	54.7405	-0.411159	0.00180171	-0.958967	1.56352e-11	-0.547808	0.000247103	0.547808
Sh3bp5	122.702	95.628	61.6562	123.801	106.157	52.487	130.102	87.8441	52.8931	-0.397891	0.00262735	-1.16667	2.38474e-15	-0.768777	6.62133e-07	0.768777
Shf	11.3986	7.45772	6.84734	12.0344	7.84341	4.9001	9.83378	10.4845	6.04515	-0.417879	0.277507	-0.861019	0.0387083	-0.44314	0.319476	0.44314
Sidt1	36.4197	30.8124	96.7044	22.9679	45.1338	78.8328	21.4727	38.3988	74.1342	0.490294	0.025819	1.6487	8.64026e-19	1.15841	1.78801e-11	2.2913
Slamf1	10.1566	5.90096	4.57205	10.7085	6.45544	4.22698	9.95822	7.39911	4.48063	-0.721032	0.0838781	-1.23573	0.00686775	-0.514702	0.316757	0.514702
Slc14a1	12.4988	6.6224	5.28716	9.53247	6.50235	7.36263	11.4395	7.21147	5.83751	-0.667638	0.0960863	-0.861034	0.0387048	-0.193396	0.676867	0.193396
Slc15a2	9.89809	18.4695	0.628372	40.4318	0.268742	0.282225	20.8998	27.2323	0.272835	-0.675535	0.0156523	-5.92426	1.68695e-20	-5.24872	5.00444e-13	5.24872
Slc17a9	73.9126	55.8066	33.3348	62.6401	56.2956	32.0233	72.665	42.3952	30.9095	-0.466896	0.00528714	-1.12073	1.49291e-09	-0.653831	0.000949995	0.653831
Slc1a5	62.0867	43.9415	26.012	64.9394	28.0306	44.8495	59.1515	22.8029	27.5283	-0.987827	2.13657e-07	-0.900968	1.82342e-06	0.086859	0.690729	-0.086859
Slc22a5	16.9125	9.86765	6.34809	15.8864	10.8597	6.19631	16.72	6.5881	5.80624	-0.852396	0.0120105	-1.45805	0.00011146	-0.605656	0.162134	0.605656
Slc30a4	33.2875	19.6973	4.59745	40.0486	20.239	2.98964	32.2793	17.3573	3.23068	-0.89897	0.000203188	-3.22796	9.42002e-20	-2.32899	1.50231e-08	2.32899
Slc7a8	1.60098	1.89194	0.357822	3.05363	1.6635	0.43088	3.07397	0.769113	0.323904	-0.679685	0.391358	-5.61875	0.000905544	-4.93907	0.00899939	4.93907
Slfn8	14.7969	12.7851	31.5883	15.1599	10.0525	23.2478	16.0261	12.879	24.7539	-0.371978	0.253937	0.80347	0.00298403	1.17545	4.07953e-05	1.22986
Slpi	3.16831	4.13186	2.9452	2.30233	1.6218	6.20444	3.29541	0.863106	9.85057	-0.207821	0.77668	1.2384	0.0319365	1.44622	0.0151591	2.27851
Smc6	27.3391	93.8048	29.1345	29.1078	103.424	34.1802	61.6145	110.496	26.6801	1.35821	1.52174e-16	-0.382889	0.071655	-1.7411	1.90926e-23	-2.35477
Smyd2	6.5206	4.5219	4.19267	5.221	3.83618	1.83382	5.83862	2.8796	1.7702	-0.597943	0.259811	-1.14626	0.0500829	-0.548322	0.395093	0.548322
Snap23	16.1566	9.30654	8.98646	15.0845	8.03741	8.05187	13.3364	11.2765	10.4289	-0.668713	0.0558908	-0.69366	0.0493809	-0.0249468	0.949382	0.0249468
Snhg9	11.5983	3.65415	14.4636	10.2003	3.61908	11.064	5.53724	5.42113	2.38541	-1.11669	0.0170519	-0.0449479	0.908942	1.07174	0.0232115	-1.07174
Sntb1	12.3638	20.5975	26.0569	13.4274	11.2333	19.6565	12.2945	16.5431	21.0102	0.383808	0.229286	0.861139	0.00370177	0.477331	0.0856119	0.92871
Socs1	56.5301	45.6711	30.792	63.8087	48.0675	28.2525	58.4027	36.8763	30.6643	-0.469386	0.00873664	-0.983028	4.25185e-07	-0.513642	0.0134441	0.513642
Sorcs2	2.88488	1.71433	0.830997	3.55319	2.82743	1.29776	3.02081	2.05705	1.3601	-0.523785	0.450899	-1.67582	0.047951	-1.15203	0.211374	1.15203
Sorl1	8.12898	8.24356	13.7254	9.58342	9.86644	16.4364	8.74294	13.8597	16.7227	0.224046	0.556153	0.803539	0.0207303	0.579494	0.0823414	1.13408
Sox4	2.89979	2.5456	4.01915	4.97163	6.86193	10.8081	2.73487	5.66748	7.06212	0.514355	0.356309	0.996831	0.0535896	0.482476	0.306607	0.941907
Sp140	11.1456	12.4924	19.9824	10.3734	11.4418	16.0422	12.1909	14.013	20.024	0.144486	0.680199	0.767423	0.0157607	0.622937	0.0439907	1.22084
Spata5l1	25.1119	23.9113	17.9488	30.6365	26.2693	19.3568	28.5529	20.4387	18.1429	-0.299047	0.216762	-0.618895	0.0156341	-0.319848	0.23213	0.319848
Spice1	14.9111	16.6554	26.564	11.8341	20.3732	25.6016	12.5374	15.7764	22.2756	0.384812	0.211079	0.91144	0.00131932	0.526628	0.0474214	1.02753
Sqrdl	5.7264	3.18484	3.63397	5.84577	4.79893	2.87581	11.0227	2.67738	6.7666	-1.07238	0.0357754	-0.702137	0.145484	0.370243	0.520034	-0.370243
Srm	19.278	18.2618	12.8787	18.6148	16.0464	9.59443	19.5092	13.0537	9.42523	-0.322141	0.266608	-0.847275	0.00764342	-0.525134	0.115632	0.525134
St3gal4	18.923	16.9652	10.2216	18.7113	15.4863	10.3792	18.3973	15.6191	8.74919	-0.241435	0.406611	-0.937957	0.00422351	-0.696523	0.0405133	0.696523
St3gal6	3.32612	7.20522	12.7956	3.87445	6.41124	9.79449	4.13496	12.8291	12.967	1.20881	0.0148899	1.70298	0.000205736	0.494173	0.185655	0.963658
St8sia6	29.3657	43.6559	44.1004	38.3651	53.1182	65.7345	37.488	60.5534	66.8121	0.582908	0.00256286	0.774379	4.05038e-05	0.191471	0.26684	0.355296
Stat1	29.3984	76.8218	187.793	33.5419	38.1763	132.223	31.9027	42.0119	142.14	0.703757	0.00036537	2.28673	2.01168e-46	1.58297	3.83814e-28	3.1401
Stat2	16.6125	18.6197	33.3123	14.9533	15.2867	22.73	15.4874	16.8986	27.7947	0.0976091	0.743978	0.842807	0.00154765	0.745198	0.00432259	1.46509
Stat4	51.7189	31.8004	33.0279	47.7458	31.8629	27.9413	50.1288	25.3405	31.2502	-0.771752	0.000135371	-0.696907	0.000519113	0.0748443	0.73963	-0.0748443
Stat5a	14.9607	3.26805	6.63217	10.9336	3.2209	7.05893	14.6574	4.0168	10.039	-2.03727	7.39596e-06	-0.761061	0.0392469	1.27621	0.0135939	-1.27621
Stat5b	54.9811	28.2585	18.7689	61.798	32.0525	19.4988	48.9965	31.3288	19.6819	-0.885588	6.88264e-06	-1.50669	4.90356e-12	-0.6211	0.0126397	0.6211
Stmn1	33.3509	37.7434	53.151	40.9373	48.994	67.9	32.7583	47.5202	48.696	0.3154	0.112327	0.674802	0.000358574	0.359402	0.0455885	0.691978
Suco	30.3152	21.2227	15.4513	27.3457	21.5969	15.2976	31.0438	18.8076	15.9503	-0.523878	0.0339189	-0.925978	0.000471261	-0.4021	0.161291	0.4021
Tap1	78.9312	103.453	148.809	80.583	86.2358	121.801	69.324	88.0372	126.829	0.25454	0.0819853	0.804197	4.37651e-09	0.549658	3.18671e-05	1.07254
Tars2	43.4905	29.446	21.5952	40.2584	31.6377	22.9667	42.0114	24.4327	16.3132	-0.575195	0.00680675	-1.02573	7.69448e-06	-0.45054	0.0715067	0.45054
Tdgf1	0.67938	1.36796	4.08127	1.37445	1.13555	5.00089	0.609628	1.40088	2.45253	-0.0187496	0.986616	1.82568	0.0274272	1.84443	0.025735	3.6814
Tdrp	46.0268	60.0741	63.776	58.8811	81.9644	103.511	52.4823	77.3023	94.7211	0.460419	0.0053693	0.752114	2.40894e-06	0.291695	0.0503828	0.555827
Tesc	19.7324	15.7611	14.5167	28.1833	17.8043	15.9897	21.9581	12.7241	9.3181	-0.592486	0.0328052	-0.79725	0.0057041	-0.204764	0.517653	0.204764
Tgtp1	38.9344	96.568	126.317	11.8111	59.0895	110.442	10.8795	69.4084	130.874	1.83618	8.38848e-20	2.56932	6.9263e-45	0.733142	1.45388e-07	1.439
Tgtp2	17.2425	0.248581	24.4274	64.8111	14.6018	26.4955	62.167	0.397756	20.9585	-3.26727	1.57421e-26	-1.01025	2.5458e-06	2.25702	4.55327e-10	-2.25702
Tha1	5.44967	8.81782	11.3111	5.81093	8.07457	13.3478	4.30491	5.73789	6.88422	0.591564	0.212444	1.04656	0.0177815	0.454998	0.253487	0.885632
Tigit	1.87432	3.22072	3.86131	1.47708	2.6599	2.61078	0.979004	3.97602	6.60941	1.26748	0.109986	1.77311	0.0153357	0.505632	0.390474	0.991059
Timeless	3.43615	5.12399	7.65641	3.72812	4.26585	4.9612	1.70626	4.97686	8.31609	0.608509	0.313808	1.21484	0.0266184	0.606328	0.21851	1.19129
Tlr12	2.63737	3.49108	7.09115	3.06539	4.06316	7.10579	3.33291	2.87259	7.41998	0.129938	0.842654	1.21482	0.0266207	1.08488	0.0422137	2.15527
Tmem64	76.522	32.2028	12.0649	78.364	30.3342	12.9023	63.693	38.6943	14.7334	-1.13511	4.16714e-10	-2.44035	1.08821e-27	-1.30525	8.69586e-07	1.30525
Tmie	11.7895	16.0985	29.8125	20.5312	15.0687	29.2999	13.0649	23.7697	29.552	0.237304	0.421382	0.95738	0.000288488	0.720076	0.00446401	1.41445
Tmod4	1.54484	1.34424	8.00319	4.64915	5.93484	6.87547	1.59048	4.93282	7.10123	0.389098	0.534731	1.28148	0.0180296	0.892378	0.0775575	1.76685
Tnf	18.3715	8.3125	2.53065	12.4933	5.58838	1.95319	11.9548	5.40322	1.1186	-1.15726	0.00285351	-2.76649	5.73164e-08	-1.60923	0.00929398	1.60923
Tnfaip8	9.01459	4.46326	4.1387	5.36205	1.98697	2.40087	7.32177	3.46621	4.28626	-1.22693	0.0250869	-1.0507	0.0493222	0.176225	0.787747	-0.176225
Tnfrsf14	63.6813	114.66	124.627	66.2156	115.972	64.6024	32.6228	135.57	76.3963	1.15038	1.06191e-14	0.71274	6.37745e-06	-0.437642	0.0011962	-0.901996
Tnfrsf18	189.519	168.165	61.2367	165.009	134.858	42.5419	141.467	130.607	52.5139	-0.212713	0.0708783	-1.65147	3.9263e-31	-1.43876	5.0587e-23	1.43876
Tnfrsf4	61.6945	43.4752	24.7917	58.1694	39.2503	19.9037	47.2803	43.3536	23.396	-0.437288	0.0171456	-1.28673	9.05463e-10	-0.849446	0.000146524	0.849446
Tnfsf4	0.495197	2.86839	1.32305	1.05339	1.56149	0.592233	0.309476	3.24916	2.37607	2.78848	0.0137195	1.84418	0.163901	-0.944293	0.258715	-1.94429
Tnfsf8	74.0299	70.5264	53.1265	64.6345	54.3776	32.5981	62.697	55.8851	36.0662	-0.178288	0.274572	-0.719739	4.9407e-05	-0.541451	0.00284128	0.541451
Tnip1	34.1858	61.9987	23.5312	37.5722	44.5848	23.4928	32.3021	40.3218	21.2945	0.47883	0.0147022	-0.604227	0.00949127	-1.08306	5.31297e-07	-0.373836
Tnks2	77.0022	66.6891	42.9935	85.8004	77.2967	48.4013	80.7385	72.7557	47.2667	-0.188579	0.213318	-0.813718	9.95056e-07	-0.625139	0.000241241	0.625139
Tob1	16.8367	24.4603	28.7228	19.7314	25.9735	29.8134	14.8612	25.4889	28.2495	0.507339	0.0573535	0.748233	0.00372553	0.240893	0.309558	0.455018
Tom1l2	7.91615	4.87451	9.71358	8.50874	5.29124	10.0654	7.28552	0.233765	7.86284	-1.26858	0.0141803	0.228434	0.571978	1.49701	0.00266107	-0.817752
Trim21	11.714	12.2832	22.2131	10.7646	13.1162	19.2772	12.3422	14.3605	22.4565	0.135676	0.691038	0.852415	0.00518476	0.716738	0.0158679	1.40862
Trmt1	12.0122	20.1936	7.62058	13.8326	11.4703	6.37756	13.8247	15.4621	3.23817	0.181036	0.56926	-1.21906	0.00250767	-1.40009	0.000334906	0.836387
Trpc4ap	95.4966	53.0205	48.1963	83.3004	57.2456	47.1819	70.3235	41.1038	53.4668	-0.734831	6.222e-06	-0.736615	6.50594e-06	-0.00178338	0.992129	0.00178338
Tspan3	7.55212	9.96969	13.3822	9.91006	10.709	13.142	6.76805	13.8515	14.8648	0.463029	0.22253	0.717553	0.0496186	0.254524	0.450488	0.482793
Tssc1	15.4557	18.8529	14.8278	15.3493	27.8653	10.1925	13.6288	23.5191	11.2543	0.668637	0.0173849	-0.280927	0.393979	-0.949564	0.00127759	-1.07802
Tssc4	6.41475	6.30349	5.02248	7.72943	5.23957	4.76881	12.5044	4.56968	4.09576	-0.768439	0.0872011	-0.931968	0.0446649	-0.163529	0.755976	0.163529
Ttc13	35.8823	34.1468	64.9197	35.3049	87.3557	122.097	31.6481	53.4386	62.7982	0.736522	0.000104273	1.28567	2.96005e-13	0.549149	0.000495764	1.07199
Ttc27	13.0578	7.87214	4.54497	9.01258	11.416	3.6751	13.4846	10.116	10.0902	-0.289641	0.429036	-0.868196	0.0322269	-0.578555	0.172486	0.578555
Tubb3	0.80424	1.45147	1.11944	1.14812	1.30238	4.38614	0.981236	2.88324	5.48612	0.68717	0.49023	1.69044	0.0459178	1.00327	0.182152	2.00327
Twf2	164.781	111.386	100.764	152.869	127.003	109.561	150.519	110.39	90.9389	-0.449996	0.000264788	-0.627517	7.10828e-07	-0.177521	0.182511	0.177521
Uba7	28.5032	33.8789	53.646	24.4968	24.7542	36.5283	24.6429	23.3384	35.0453	0.0521017	0.826828	0.697699	0.00126116	0.645597	0.00254086	1.26533
Ubash3b	4.81164	6.50983	7.60486	5.03293	8.80104	11.0675	5.68663	11.1811	12.1037	0.729141	0.10482	0.95456	0.0281266	0.225419	0.556657	0.424728
Unc45a	29.3521	28.8882	67.3822	27.7862	46.8467	46.7551	27.4228	26.4985	41.6426	0.260243	0.243155	0.898744	9.7084e-06	0.638502	0.00103072	1.25148
Vim	147.469	68.1185	56.8347	148.639	73.4906	54.884	150.54	78.1135	61.9244	-1.04861	9.92467e-15	-1.35279	1.46336e-21	-0.304179	0.0602552	0.304179
Vps37b	158.701	111.728	91.8357	169.106	112.998	88.1474	151.847	108.814	110.346	-0.542527	1.17444e-05	-0.718707	1.52928e-08	-0.176181	0.192393	0.176181
Wdr12	5.44639	8.0406	3.81656	5.98214	8.2184	16.2717	4.67445	5.21611	8.83001	0.369212	0.439294	0.858978	0.0518495	0.489766	0.236546	0.95543
Wdr82	144.314	88.8195	67.8442	135.059	99.6271	69.271	138.81	80.6156	58.2789	-0.649895	7.97917e-07	-1.0922	6.8004e-15	-0.4423	0.00358166	0.4423
Whsc1l1	96.6241	79.1035	55.126	91.5669	78.86	58.4532	87.8151	68.9527	48.6344	-0.306734	0.036379	-0.765928	1.05461e-06	-0.459195	0.00488268	0.459195
Wnt5b	1.80013	9.50345	4.45094	7.65355	6.90298	6.03627	2.18212	10.8925	9.78919	1.19149	0.012606	0.736799	0.154518	-0.45469	0.281716	-0.940117
Wtap	63.7352	58.2948	41.549	70.3702	67.7705	43.0283	69.0915	51.0612	43.7338	-0.216974	0.185198	-0.645808	0.000224949	-0.428835	0.0172499	0.428835
Xaf1	5.59253	12.5637	15.7956	5.16922	12.6618	10.2451	4.31757	12.5614	11.9369	1.34903	0.00125781	1.33879	0.00145617	-0.0102372	0.975605	-0.0477119
Xbp1	35.6129	25.1675	20.7765	33.4159	25.367	15.9337	32.1698	24.1343	17.5612	-0.467683	0.0419482	-0.867522	0.000426499	-0.399839	0.130313	0.399839
Xkrx	19.3179	12.1963	10.1993	19.8571	15.1192	13.4419	18.9104	12.1676	8.95836	-0.590197	0.0514185	-0.847149	0.00765252	-0.256953	0.461273	0.256953
Xxylt1	12.9063	6.50641	4.21324	12.7671	5.69267	3.73269	14.0959	9.63694	4.87587	-0.813691	0.0300004	-1.60172	0.000195959	-0.788034	0.108613	0.788034
Yipf2	4.38076	3.48472	4.11678	6.36728	4.84714	0.243317	9.43285	4.86491	4.3468	-0.561242	0.274715	-1.22349	0.0341274	-0.662245	0.295152	0.662245
Zbp1	25.4943	42.3837	90.5342	25.9295	29.0397	63.2553	17.783	24.7009	56.3965	0.455729	0.053869	1.61029	6.86751e-16	1.15457	4.6155e-10	2.28385
Zfp386	13.999	22.7615	22.5191	20.5316	26.252	33.1308	15.0382	27.0892	22.7117	0.582866	0.0299935	0.665891	0.012345	0.0830245	0.731114	0.138878
Zhx2	8.97278	9.59997	4.04029	10.9802	4.1218	3.81682	14.5993	4.01867	4.313	-0.972599	0.0178111	-1.52391	0.000760655	-0.551308	0.299109	0.551308

## Sheet: Effector CD4 T cell +IL-2
Cell Type	Naïve CD4+ CD44low CD25- cells
Culture Conditions	anti-CD3/CD28 +100 U/ml human IL-2 (72 hours)
Mouse Gene Symbol	Wild Type: Stat5a+/+ Stat5b+/+ (RPKM Replicate 1)	STAT5A-deficient: Stat5a-/- Stat5b+/- (RPKM Replicate 1)	STAT5B-deficient: Stat5a+/- Stat5b-/- (RPKM Replicate 1)	Wild Type: Stat5a+/+ Stat5b+/+ (RPKM Replicate 2)	STAT5A-deficient: Stat5a-/- Stat5b+/- (RPKM Replicate 2)	STAT5B-deficient: Stat5a+/- Stat5b-/- (RPKM Replicate 2)	Log2 Fold Change (STAT5A-deficient ÷ WT)	p Value (STAT5A-deficient vs WT)	Log2 Fold Change (STAT5B-deficient ÷ WT)	p Value (STAT5B-deficient vs WT)	Log2 Fold Change (STAT5B-deficient ÷ STAT5A-deficient)	p Value (STAT5B-deficient vs STAT5A-deficient)	Paralog Preference Rank
1500011B03Rik	5.16607	15.2108	10.0899	5.90783	20.1666	21.0784	1.66255	0.000489717	1.45721	0.00295379	-0.205338	0.586787	-0.380424
1500012F01Rik	149.644	225.207	278.282	203.503	252.042	304.168	0.445946	0.00774508	0.702184	2.0949e-05	0.256239	0.110204	0.543268
2810428I15Rik	46.3355	51.4154	54.8565	29.3021	47.0383	65.1231	0.392752	0.126888	0.65327	0.00858087	0.260518	0.271335	0.552699
3000002C10Rik	108.01	69.9841	66.9989	75.728	41.5133	43.2423	-0.720001	0.000912794	-0.762859	0.000449889	-0.0428579	0.855409	0.0428579
4930483K19Rik	7.73222	3.10466	3.38721	4.87952	1.66736	1.69917	-1.65263	0.0284087	-1.6819	0.0255303	-0.0292719	0.976352	0.0292719
5730408K05Rik	16.3881	27.8017	22.3119	18.0658	33.0424	17.7936	0.847708	0.0101875	0.211008	0.557749	-0.6367	0.0457433	-1.24551
5830417I10Rik	8.51301	4.38783	4.61718	13.5822	4.69814	4.24354	-1.36642	0.0176147	-1.39638	0.0151831	-0.0299645	0.966739	0.0299645
5830428M24Rik	0.451353	1.46247	2.30597	0.45143	3.13457	3.75674	4.65608	0.0186699	5.19199	0.00431248	0.535905	0.551977	1.12087
6820431F20Rik	35.4386	42.8477	45.0634	26.9543	45.6396	58.2081	0.511622	0.0599832	0.707043	0.00752049	0.195421	0.430184	0.42249
A130040M12Rik	1969.45	1194.46	1584.5	1926.72	1186.04	1464.01	-0.703245	4.34262e-07	-0.375944	0.00648429	0.327301	0.018778	-0.327301
A930005H10Rik	4.67527	8.34118	5.79906	4.6027	12.9	10.6881	1.38147	0.0163612	0.962257	0.116256	-0.419215	0.392641	-0.811533
AA465934	10.8843	110.582	12.0346	8.37512	106.373	12.4904	3.50329	5.69977e-32	0.311668	0.496008	-3.19162	2.26193e-29	-6.36155
Aacs	41.0296	29.7538	31.519	38.1832	20.5596	21.2523	-0.650152	0.0247867	-0.623806	0.029895	0.0263462	0.933208	-0.0263462
Abhd4	10.6813	16.9522	18.0706	10.4739	19.7133	26.1135	0.850299	0.0398933	1.10761	0.0052263	0.257311	0.460356	0.546817
Acly	105.736	74.5004	63.7567	74.0685	52.8268	46.9498	-0.494599	0.020264	-0.718598	0.000966739	-0.224	0.329379	0.224
Acsl3	19.1732	12.9348	10.3656	13.8647	9.12422	6.30154	-0.57362	0.164709	-1.05911	0.0169038	-0.485485	0.317091	0.485485
Aen	17.8908	33.5439	35.2071	22.5266	18.3261	34.0523	0.357514	0.279401	0.761449	0.014428	0.403934	0.17245	0.840033
AI504432	18.6079	26.2934	27.3537	19.6119	32.9565	30.5311	0.678234	0.0376125	0.59819	0.0686824	-0.080044	0.788557	-0.129797
AI506816	54.1752	54.8605	24.1171	66.5356	47.2199	42.0588	-0.226018	0.336528	-0.884828	0.000507108	-0.65881	0.0118149	0.65881
AI848285	4.29738	7.18835	6.76967	2.4059	7.36044	9.06947	1.20759	0.0735979	1.36769	0.0367779	0.160098	0.766062	0.352743
Ak4	16.8732	6.8344	5.86435	11.642	2.21227	0.452338	-1.6119	0.00213779	-2.21335	0.000119465	-0.60145	0.42084	0.60145
Akr1c18	7.81144	1.37699	0.55933	1.46391	0.516179	0.85483	-2.96811	0.00734795	-2.99447	0.00669398	-0.0263593	0.988006	0.0263593
Aldoa	1129	634.741	586.694	728.303	409.872	393.066	-0.820528	1.58119e-08	-0.943376	9.71322e-11	-0.122848	0.406755	0.122848
Aldoc	20.7721	2.38659	1.42868	3.28683	1.18506	1.41612	-2.92516	2.72843e-05	-3.50124	3.93376e-06	-0.576082	0.638423	0.576082
Angptl2	4.2077	7.04827	6.42271	5.06142	22.3866	17.9692	1.67699	0.00127696	1.37488	0.0114427	-0.302103	0.468154	-0.575121
Ankrd37	28.5043	8.13189	9.9132	14.6544	6.86687	5.25035	-1.46778	0.000592166	-1.49763	0.000451371	-0.0298448	0.955711	0.0298448
Anxa6	46.1639	29.128	25.5614	22.3379	18.5399	19.2907	-0.52353	0.082829	-0.648725	0.0339233	-0.125195	0.703955	0.125195
Ap3b1	73.1699	65.359	38.3261	29.0621	26.6636	24.712	-0.1559	0.52732	-0.738975	0.00526966	-0.583076	0.0309972	0.583076
Apobec3	33.9754	1.20524	33.1448	75.659	0.451336	5.02875	-6.54159	5.49031e-28	-1.53616	1.03791e-07	5.00543	1.24623e-10	-5.00543
Arhgdig	6.89236	2.4884	2.38794	2.64985	0.754723	0.687176	-1.52635	0.0815662	-2.10225	0.0280587	-0.575895	0.638526	0.575895
Arl2bp	29.0026	27.7448	16.2291	27.686	33.7641	17.4729	0.153875	0.603909	-0.782848	0.0204502	-0.936723	0.00463522	0.482132
Arsb	4.09917	1.69072	2.07227	5.15605	1.33911	1.25972	-2.0741	0.0305291	-1.55519	0.0755784	0.518909	0.672344	-0.518909
Asah1	11.9284	5.11207	5.7646	12.1036	7.12511	4.59227	-0.982611	0.0533503	-1.27155	0.0164312	-0.28894	0.641829	0.28894
Asns	35.1824	7.977	7.02675	7.06144	4.62529	2.333	-1.78586	7.0937e-05	-2.22414	3.46395e-06	-0.438273	0.491089	0.438273
Atox1	121.884	208.017	116.199	117.737	189.545	152.187	0.733734	3.59615e-05	0.134762	0.466161	-0.598972	0.000630315	-1.16588
Atp10d	2.87744	8.97767	0.453162	4.23031	9.47956	4.94333	1.34964	0.0281321	-0.494713	0.549139	-1.84435	0.00544804	-2.2175
Atp6v1d	32.677	41.9072	40.3119	31.763	47.8715	59.1098	0.498279	0.0642098	0.604009	0.0225183	0.105731	0.670394	0.243234
Atp7a	1.68255	2.34613	1.21801	0.452253	4.73456	0.45177	2.62689	0.0250964	-0.0195396	0.991094	-2.64643	0.0237698	-5.41471
Atp8b4	6.79446	2.74285	2.42834	3.08978	1.12953	1.35359	-1.27959	0.110245	-1.70466	0.0459545	-0.425069	0.686495	0.425069
Axl	25.7594	47.6746	36.8081	36.2794	65.6304	60.5392	0.858729	0.000984903	0.620161	0.0203549	-0.238568	0.320147	-0.44601
Bach2	34.8926	43.0497	42.8285	37.8236	67.0388	59.5362	0.597438	0.0184105	0.457892	0.0746094	-0.139546	0.558674	-0.24848
Bcar3	0.884159	1.90696	3.39008	1.47651	7.00422	8.65244	2.08856	0.0292767	2.34297	0.0104887	0.25441	0.69536	0.543917
Bckdhb	15.0406	33.3824	16.6453	15.2644	26.756	19.8598	1.00393	0.00315215	0.23863	0.528152	-0.765301	0.0192359	-1.50227
Bcl2l15	0.69196	2.5844	2.24062	0.538702	1.50044	1.25655	4.26013	0.0414929	4.23119	0.0430658	-0.0289339	0.979443	-0.0289339
Bcl6	2.41311	4.36909	5.02237	2.95106	8.84032	10.8731	1.35709	0.0580833	1.62267	0.0175325	0.265582	0.627545	0.565142
Bmyc	123.159	82.7846	42.8082	42.8048	28.7009	27.433	-0.571318	0.00952563	-1.2662	1.17313e-07	-0.694885	0.00643033	0.694885
Bnip3	88.0698	12.9666	13.2093	19.6395	5.83389	6.31571	-2.47612	1.66856e-13	-2.50611	7.94412e-14	-0.0299953	0.950425	0.0299953
Bnip3l	67.0185	31.5338	27.9326	30.5847	28.4759	28.1416	-0.70834	0.00867945	-0.813979	0.00282571	-0.10564	0.724316	0.10564
Bsg	319.804	202.878	205.025	232.604	148.955	186.784	-0.640588	0.000110053	-0.516144	0.00163667	0.124443	0.46498	-0.124443
Btg2	22.2344	33.6907	34.706	40.595	66.7636	68.7805	0.695063	0.00893053	0.705957	0.00761356	0.0108937	0.964115	0.053538
C2cd5	11.7162	7.66754	6.02702	10.5722	1.49511	7.73894	-1.36625	0.017629	-0.602121	0.233701	0.764127	0.226469	-0.764127
Cadm1	3.65904	9.3359	20.5394	9.05162	22.4422	17.95	1.36435	0.00449301	1.62693	0.000399528	0.26258	0.479439	0.556311
Cblb	35.3252	25.5057	16.4911	17.2592	14.383	15.1174	-0.40566	0.220371	-0.766049	0.0275	-0.360388	0.328891	0.360388
Ccl1	2.54108	5.35442	2.65168	0.9165	5.04193	14.8559	1.69055	0.0479749	2.41497	0.00140985	0.724422	0.206735	1.48996
Ccl22	5.11457	12.9319	22.5344	2.36834	12.9587	39.4652	1.87605	0.000903925	3.06938	5.63669e-11	1.19333	0.000647537	2.42363
Ccl3	56.2706	59.7723	31.6821	86.636	94.0762	47.4457	0.124015	0.562551	-0.886545	0.000220837	-1.01056	2.00327e-05	0.645491
Ccnd2	102.91	91.1306	74.9559	71.7003	48.8146	42.5454	-0.304737	0.148336	-0.592909	0.00627143	-0.288172	0.198562	0.288172
Ccng1	76.0451	122.851	138.193	89.2425	142.679	157.309	0.690435	0.000391142	0.814243	2.31166e-05	0.123808	0.493407	0.278531
Ccr4	38.3192	15.5288	20.0016	23.1054	21.7398	20.3342	-0.711556	0.0281344	-0.62972	0.0481844	0.0818361	0.816924	-0.0818361
Ccr7	423.55	356.21	190.026	178.331	185.23	165.701	-0.142794	0.367515	-0.782218	2.00217e-06	-0.639424	0.000114356	0.639424
Cd19	0.806647	1.13615	2.26302	0.534944	1.37994	10.462	0.900514	0.558113	3.35982	0.00116529	2.45931	0.00614248	5.04427
Cd209c	5.01521	6.35501	10.7642	6.25681	13.7143	19.0984	0.78679	0.150266	1.41041	0.00428689	0.623624	0.152431	1.28259
Cd37	39.6028	42.9238	42.4401	37.3089	55.487	74.6392	0.373369	0.145741	0.584161	0.0191432	0.210792	0.37613	0.454063
Cd5	353.743	480.895	478.987	379.902	603.222	570.891	0.569282	0.00015306	0.492334	0.00107234	-0.0769487	0.601507	-0.122924
Cd52	467.213	709.903	756.269	530.275	1212.71	1327.88	0.952312	6.01149e-11	1.0357	1.04995e-12	0.0833927	0.554354	0.20014
Cd5l	0.883999	0.465671	2.6764	3.50709	1.08522	23.5308	-1.83044	0.168907	2.57024	7.38655e-05	4.40068	3.61026e-07	3.38366
Cd74	25.5363	19.8334	62.3905	51.9921	40.7163	188.147	-0.351699	0.210134	1.66873	5.87649e-14	2.02043	3.78251e-18	3.01603
Cd79a	0.865316	1.69512	3.08984	1.19946	2.49276	18.1216	0.554862	0.651096	3.2646	3.26627e-05	2.70974	0.000168658	5.5171
Cd96	10.9652	15.302	12.2829	10.462	26.6144	28.8838	0.966937	0.0151245	0.93556	0.0188023	-0.0313766	0.927346	-0.0313766
Cdk5rap1	24.3012	30.0003	27.3168	7.95774	32.23	30.0468	0.957963	0.00403376	0.806377	0.0173599	-0.151585	0.608023	-0.272892
Cdkn1a	51.6818	81.9431	81.6293	39.7496	80.8983	91.2773	0.84738	0.000209827	0.893811	8.14788e-05	0.046431	0.822003	0.123968
Cdv3	48.8293	42.9241	50.2172	60.8063	30.4742	42.7115	-0.582146	0.0216386	-0.279456	0.250056	0.30269	0.24719	-0.30269
Chchd10	48.3868	24.7518	17.6469	14.1281	14.0432	10.7419	-0.658887	0.0391829	-1.16486	0.000677783	-0.505974	0.180002	0.505974
Chrm4	8.85684	5.41604	3.27926	4.85689	3.79515	2.12715	-0.620526	0.312639	-1.47743	0.0357171	-0.8569	0.271442	0.8569
Chst2	13.3992	21.5589	22.5633	28.0454	36.9946	43.876	0.506049	0.114183	0.660465	0.0344672	0.154416	0.595654	0.340829
Cib2	0.656928	1.78885	2.15495	2.82022	12.0805	13.2272	2.16891	0.00607751	2.23653	0.00408227	0.0676204	0.901443	0.167156
Cish	86.4983	16.4032	11.4776	15.2392	5.12116	4.40346	-2.24966	1.27146e-11	-2.76068	1.01964e-14	-0.511015	0.304509	0.511015
Cndp2	62.4811	34.4121	34.6508	32.6984	27.9288	27.5011	-0.591546	0.0277637	-0.645095	0.016716	-0.0535487	0.854305	0.0535487
Cpm	6.43039	2.81936	2.4429	4.16142	0.918155	1.33682	-1.27955	0.110254	-1.70462	0.0459588	-0.425069	0.686495	0.425069
Cpne8	66.068	276.021	85.222	64.2237	215.825	115.943	1.92739	3.56678e-24	0.603705	0.00388207	-1.32369	1.19741e-13	-2.61515
Crabp2	77.9813	57.5916	25.7947	50.3473	22.9221	23.0692	-0.668415	0.00594344	-1.40513	1.38525e-07	-0.736714	0.0110775	0.736714
Ctla4	138.579	72.4209	83.2515	84.8058	40.8399	55.1887	-0.97149	4.10895e-06	-0.713275	0.000479377	0.258216	0.253208	-0.258216
Ctse	20.1644	40.6307	3.41694	20.8909	50.9686	25.5688	1.1544	8.49672e-05	-0.57207	0.125504	-1.72647	5.69869e-08	-1.73257
Cxcr6	2.10298	2.90113	4.12511	2.63454	6.06668	9.60983	1.14504	0.1629	1.63702	0.0299848	0.49198	0.431336	1.02249
Cyp1a1	0.541807	0.732894	1.00657	1.08859	13.0555	18.5362	3.60982	0.000286128	4.01468	1.42876e-05	0.404857	0.434002	0.84543
Cyp51	111.849	78.8372	71.4882	81.9037	47.7335	48.7454	-0.602238	0.00428586	-0.713932	0.000791125	-0.111694	0.622242	0.111694
Cytip	63.6536	37.2571	36.5371	28.3973	19.4486	23.85	-0.690888	0.0122568	-0.621854	0.0222642	0.0690347	0.817134	-0.0690347
D630039A03Rik	5.6226	0.72542	0.51604	1.9078	0.462959	0.538357	-2.61292	0.0260168	-5.43132	0.00183177	-2.8184	0.23581	2.8184
Dapl1	45.0231	25.0964	9.49581	78.6653	21.6705	42.9967	-1.40749	2.31706e-07	-1.26444	1.89642e-06	0.14305	0.65463	-0.14305
Dbi	218.965	148.306	185.717	202.684	113.065	166.603	-0.681048	9.8375e-05	-0.284318	0.0930191	0.39673	0.0256949	-0.39673
Dcxr	8.76345	14.1825	15.0494	9.27675	13.6906	18.1223	0.588257	0.192489	0.845468	0.0503476	0.25721	0.514407	0.546717
Dhcr24	85.4912	67.2633	61.6754	79.4272	34.9693	37.2054	-0.675583	0.00255451	-0.763089	0.000711806	-0.087506	0.719228	0.087506
Dhcr7	37.5707	21.3479	19.9367	23.9866	17.7892	15.4213	-0.635516	0.047401	-0.821066	0.0122583	-0.18555	0.605857	0.18555
Dnah8	4.42	5.46522	1.52893	4.08059	2.43338	1.52709	-0.180806	0.807303	-1.93569	0.0490591	-1.75488	0.0835248	1.75488
Dok2	30.2416	35.1678	39.8963	21.4607	32.2302	43.0251	0.400216	0.178801	0.677701	0.0177564	0.277485	0.305692	0.586435
Dsp	2.9276	3.62079	5.28969	4.48363	15.8931	21.3392	1.42641	0.018813	1.84438	0.00111594	0.417972	0.352725	0.870484
Dusp6	30.5543	52.6436	67.308	40.5763	59.4468	64.3556	0.671497	0.0084698	0.880111	0.000390624	0.208614	0.361355	0.447621
Ecm1	4.71838	2.86169	0.457892	4.23833	1.41526	0.458706	-0.963473	0.253329	-5.61973	0.000872141	-4.65626	0.0180011	4.65626
Egln1	52.4329	30.2916	27.5309	26.616	21.3661	20.7004	-0.603674	0.0368347	-0.751347	0.0105745	-0.147673	0.644033	0.147673
Egln3	36.0329	2.71154	3.11657	1.82971	2.87783	1.49423	-2.87825	2.75579e-07	-3.21783	4.23178e-08	-0.339577	0.717533	0.339577
Egr2	21.214	32.8395	31.1828	29.0732	39.2615	45.3147	0.53221	0.0709723	0.578782	0.0473103	0.0465719	0.863848	0.124574
Eif4ebp1	65.7105	24.7712	20.5506	17.7524	20.62	14.377	-0.873489	0.00288969	-1.30629	2.60843e-05	-0.432799	0.217627	0.432799
Ell2	16.5553	11.4048	14.4628	16.2851	6.20362	10.25	-0.898141	0.0414763	-0.434927	0.285847	0.463214	0.323933	-0.463214
Elovl6	13.7238	7.39618	6.33667	10.8987	3.40064	3.19616	-1.30002	0.0133811	-1.47935	0.00596499	-0.179334	0.787093	0.179334
Emd	71.1528	109.373	74.2629	63.4804	108.669	79.8912	0.702439	0.000647327	0.177288	0.412046	-0.52515	0.00918634	-1.01991
Eno1	1405.04	712.917	623.636	795.225	267.349	278.67	-1.15588	1.99264e-15	-1.30469	5.10168e-19	-0.148818	0.318367	0.148818
Entpd4	25.8878	14.082	9.13002	13.4173	13.1225	10.5154	-0.520295	0.171549	-1.05401	0.0103859	-0.533714	0.231195	0.533714
Ercc1	24.4128	38.5624	38.0914	27.2157	43.4188	52.8362	0.673262	0.0190201	0.809565	0.00397457	0.136302	0.595921	0.304247
Ero1l	56.5534	23.8797	24.0527	25.6067	17.9352	18.0268	-0.937287	0.00170483	-0.967475	0.0011958	-0.0301886	0.92937	0.0301886
Esyt1	106.968	84.4614	60.8182	65.4995	55.2506	52.6434	-0.298873	0.157452	-0.627968	0.00405911	-0.329095	0.144796	0.329095
Ext1	12.4894	17.2288	25.8421	20.3086	31.3458	30.5936	0.589753	0.0928935	0.781207	0.0216463	0.191453	0.539847	0.413846
Fabp5	225.704	108.622	147.408	107.462	86.0815	72.6376	-0.767194	3.60909e-05	-0.619793	0.000694863	0.147401	0.449371	-0.147401
Fads2	69.4972	31.5056	22.3056	40.1485	6.49631	6.6222	-1.54616	1.02831e-07	-1.97622	1.35297e-10	-0.430062	0.25983	0.430062
Fam114a2	15.7449	12.5532	13.8261	15.6964	19.4011	3.59522	0.00736715	0.984845	-0.882119	0.0466391	-0.889486	0.0448166	0.874752
Fam132a	11.6655	2.36245	5.6319	4.79724	1.82895	5.94171	-1.94891	0.0066921	-0.556579	0.327703	1.39234	0.0757969	-1.39234
Fam162a	338.733	191.782	183.887	177.843	153.32	165.67	-0.575758	0.000555582	-0.58956	0.000401242	-0.0138018	0.936257	0.0138018
Fam212b	3.88245	7.97606	9.81926	4.66902	8.5298	11.0356	0.992877	0.104934	1.35126	0.0189431	0.358382	0.465108	0.750699
Fam213a	14.4716	8.06392	12.651	36.1217	10.955	19.2206	-1.38033	0.000407251	-0.709746	0.0427773	0.670588	0.121177	-0.670588
Fam71b	9.2182	1.795	1.48953	2.21848	1.40249	1.67385	-1.81113	0.0304101	-2.38721	0.00895752	-0.576082	0.638423	0.576082
Farp1	15.2696	3.12478	3.04352	9.68048	5.36492	6.20199	-1.55791	0.00527863	-1.42145	0.00884959	0.136462	0.84529	-0.136462
Fcer2a	0.856256	2.26222	3.48848	0.451779	0.451293	10.9151	0.900604	0.558077	3.57936	0.000330185	2.67876	0.0019719	5.48612
Fcrl1	2.49576	1.39453	7.55322	3.85932	4.32314	21.7701	-0.247932	0.772116	2.21791	0.000105163	2.46584	3.54253e-05	4.24299
Fdft1	48.3499	28.9087	27.7964	32.2018	23.2235	21.7756	-0.61218	0.032726	-0.698788	0.0155579	-0.0866084	0.782904	0.0866084
Fdps	274.101	119.996	104.297	141.658	53.3126	53.8747	-1.2529	1.18741e-11	-1.41301	4.33882e-14	-0.160112	0.439576	0.160112
Fosl2	20.0202	15.0285	10.6525	10.7453	7.24405	5.99422	-0.483784	0.24771	-0.969435	0.0310313	-0.485652	0.316926	0.485652
Furin	13.9024	17.3585	12.3804	17.1831	37.7597	40.9641	0.830764	0.0156238	0.745573	0.0313561	-0.0851911	0.7815	-0.13863
Fxyd5	152.207	182.962	195.588	187.817	287.607	327.111	0.473353	0.00490345	0.591994	0.000389709	0.118642	0.463667	0.270031
Galk1	132.663	71.5213	63.3438	72.7616	32.7731	35.0735	-0.969552	7.35124e-06	-1.08494	6.77148e-07	-0.115392	0.634322	0.115392
Galnt6	21.7421	8.45407	11.8205	11.1049	0.858659	17.3509	-1.84763	0.000261325	-0.208739	0.590833	1.63889	0.00166451	-1.63889
Gapdh	3320.23	2096.89	1982.15	2242.72	1168.65	1280.16	-0.758921	3.68773e-08	-0.788993	1.05883e-08	-0.0300715	0.827692	0.0300715
Gbp2	59.6591	32.9008	47.6232	54.1169	22.0346	21.1366	-1.02856	0.000113206	-0.752243	0.00325494	0.276314	0.344674	-0.276314
Gbp5	46.5153	32.2101	24.3844	24.8157	11.9398	9.76283	-0.680087	0.0249965	-1.0805	0.000736825	-0.400412	0.256275	0.400412
Gcat	23.9896	15.9635	16.5776	18.6304	8.14795	10.1802	-0.795208	0.0386125	-0.710686	0.0598021	0.0845217	0.842974	-0.0845217
Gimap9	36.7554	37.7375	40.5447	38.8145	62.4092	79.537	0.402139	0.115852	0.620578	0.0124392	0.218439	0.355329	0.469401
Glipr1	57.8328	98.9598	111.708	66.1714	106.483	121.681	0.732165	0.000491072	0.879782	2.08624e-05	0.147616	0.442002	0.326117
Glo1	47.8402	59.9703	27.9783	45.9587	26.2325	28.6232	-0.119281	0.636987	-0.768305	0.0050686	-0.649024	0.0198295	0.649024
Gm10845	17.3658	40.8511	20.811	19.2554	40.6398	26.4021	1.174	0.000141065	0.359984	0.29503	-0.81402	0.0052753	-1.59928
Gm12070	1076.49	677.071	635.678	731.57	383.515	414.817	-0.759958	1.62672e-07	-0.802644	3.25168e-08	-0.0426866	0.772258	0.0426866
Gm12238	0.451293	46.6056	8.08231	0.451293	0.451293	9.00226	8.12828	9.89306e-15	6.66883	1.88377e-06	-1.45945	0.000335575	-2.89555
Gm12250	7.33807	1.54855	2.37711	3.44104	0.991897	1.43646	-2.22357	0.0174815	-1.70466	0.0459545	0.518909	0.672344	-0.518909
Gm13546	15.8778	3.83841	1.49787	1.79743	0.736124	1.75015	-1.80675	0.00655894	-2.54249	0.000639003	-0.735739	0.462501	0.735739
Gm19757	7.16894	18.0369	9.21718	8.34834	16.2952	8.97969	1.17948	0.00834406	0.237748	0.644701	-0.941733	0.0280967	-1.85927
Gm2a	18.7972	9.68088	10.1213	21.8894	15.6502	18.9994	-0.761026	0.0489189	-0.520612	0.160028	0.240415	0.563818	-0.240415
Gm5069	51.4785	33.5983	30.8135	35.7397	18.7486	20.3447	-0.73264	0.00943988	-0.790685	0.00524739	-0.0580449	0.852907	0.0580449
Gm5523	210.842	135.547	128.619	149.278	74.102	84.0877	-0.77525	2.13471e-05	-0.78444	1.63969e-05	-0.00919002	0.962164	0.00919002
Gm5779	20.7399	144.11	113.881	19.7063	153.987	144.364	2.89957	3.56214e-32	2.66016	2.25759e-26	-0.239411	0.186253	-0.447352
Gm6498	79.7442	49.8678	48.5881	54.4726	26.4036	32.2683	-0.808567	0.000896914	-0.764888	0.00151277	0.0436788	0.869707	-0.0436788
Gm6981	110.79	69.9578	65.851	76.0319	39.0006	42.9887	-0.769464	0.000398276	-0.799413	0.000233355	-0.0299485	0.899142	0.0299485
Gpi1	350.603	166.583	156.798	196.053	110.881	113.949	-0.970518	1.17631e-08	-1.0318	1.47008e-09	-0.0612779	0.735749	0.0612779
Gpr65	21.931	9.18841	6.48659	6.64605	2.68105	3.58739	-1.3272	0.00810608	-1.64203	0.00174164	-0.314835	0.627846	0.314835
Gprin3	7.04326	1.50696	2.70227	5.89915	2.08879	1.27409	-2.04882	0.0109079	-2.07767	0.00972152	-0.028844	0.979504	0.028844
Grhpr	47.4705	21.6747	18.3247	19.8621	12.9273	11.5738	-0.967548	0.00281733	-1.22595	0.0002522	-0.258405	0.502924	0.258405
Gsto1	23.1714	16.6444	13.6011	18.1076	10.6571	9.47196	-0.645932	0.0888798	-0.915532	0.0200769	-0.2696	0.535386	0.2696
Gstt1	4.09574	1.71684	1.41381	3.70131	0.451293	0.591973	-2.61289	0.0260188	-2.63906	0.0242019	-0.026171	0.988079	0.026171
Gypc	28.6586	47.6857	42.5019	18.3388	39.4301	28.0005	0.908109	0.0017332	0.582043	0.0535502	-0.326066	0.221703	-0.623048
Gzmb	122.239	17.3691	5.31212	8.80852	0.55494	1.28927	-2.92667	1.05319e-18	-4.43406	4.27977e-27	-1.50739	0.019423	1.50739
Hcst	16.7686	24.48	21.1027	13.0026	23.2784	30.1572	0.652481	0.0679615	0.738733	0.0356352	0.0862526	0.787271	0.204089
Hectd2	2.16202	2.13867	0.451513	1.33938	3.00609	0.451369	0.713763	0.47627	-4.2528	0.0407282	-4.96657	0.00822475	2.80207
Higd1a	60.4279	29.4121	29.0453	27.8732	23.6712	29.1221	-0.749608	0.0077815	-0.623221	0.0237065	0.126387	0.678678	-0.126387
Hilpda	48.791	16.6669	13.1919	16.2446	14.3241	16.3563	-1.1039	0.000973954	-1.18327	0.000445698	-0.0793652	0.841327	0.0793652
Hist2h2ac	3.58274	8.37729	6.07229	2.51382	5.863	3.66111	1.46298	0.0376879	0.80502	0.301941	-0.657959	0.284061	-1.29539
Hist2h2bb	2.24932	8.47613	5.39665	1.25883	3.60257	1.12709	1.82614	0.0289672	0.939737	0.328437	-0.886404	0.213939	-1.76087
Hk1	68.6623	41.78	40.2894	51.0756	38.988	38.8324	-0.546422	0.0259461	-0.612916	0.0128762	-0.0664945	0.800952	0.0664945
Hk2	40.7163	16.9191	18.0489	24.9643	8.54675	8.51852	-1.36482	8.88786e-05	-1.3385	0.000104778	0.0263228	0.950362	-0.0263228
Hmgcr	129.328	88.6583	87.7669	87.4745	51.6709	50.297	-0.626944	0.0022158	-0.66661	0.00115366	-0.0396664	0.855961	0.0396664
Hmgn2	329.698	448.48	444.026	297.025	492.63	509.655	0.59357	0.000103697	0.582186	0.00013897	-0.0113841	0.939102	0.00843131
Hmgn5	38.4008	23.812	34.1855	41.3454	19.3166	22.9301	-0.867077	0.00369882	-0.491619	0.0813545	0.375457	0.238276	-0.375457
Hopx	16.3211	6.11549	4.95175	10.0786	0.451293	4.78985	-2.07761	0.000391292	-1.38654	0.00772551	0.691069	0.343685	-0.691069
Hpcal1	33.243	16.6975	34.0397	29.2763	21.3148	38.9093	-0.734722	0.0229529	0.211861	0.451969	0.946583	0.00249333	-0.287232
Iah1	22.1568	10.1245	15.9981	13.0579	9.58569	16.2272	-0.868088	0.0393366	-0.151524	0.686337	0.716565	0.0953883	-0.716565
Icam1	6.40153	9.876	10.1405	5.10904	9.67786	14.7882	0.787094	0.150108	1.1492	0.0254444	0.362103	0.424802	0.758032
Icos	61.1057	25.1303	46.1124	40.1502	18.1619	26.348	-1.22107	1.89652e-05	-0.508914	0.0484322	0.712151	0.0191937	-0.712151
Id3	68.004	88.3835	135.282	103.527	140.62	167.13	0.421565	0.0326154	0.796273	3.03235e-05	0.374707	0.0413091	0.780222
Idi1	220.833	158.702	147.183	152.56	84.9025	80.7476	-0.608983	0.000637943	-0.729761	4.9068e-05	-0.120778	0.521232	0.120778
Ier3	14.3423	5.0322	3.40218	6.56251	4.70479	3.62565	-1.13008	0.0460315	-1.73191	0.0053154	-0.601828	0.420553	0.601828
Ifi30	46.5732	30.0584	17.7916	59.9074	31.493	49.505	-0.787699	0.00284736	-0.685401	0.00818479	0.102299	0.721745	-0.102299
Igfbp4	47.146	13.997	15.0543	10.4035	6.08467	5.25544	-1.49577	6.84279e-05	-1.52556	4.81726e-05	-0.0297894	0.949607	0.0297894
Igtp	64.6388	21.9745	24.6272	35.825	15.2734	16.7506	-1.42273	1.42021e-06	-1.30541	6.11924e-06	0.117326	0.738658	-0.117326
Ikbke	27.619	35.8056	30.6386	32.9186	52.8215	42.4577	0.574769	0.0353837	0.238815	0.400809	-0.335954	0.202757	-0.641762
Ikzf3	3.84371	3.3007	6.1539	6.85238	21.2269	18.1369	1.12082	0.0307167	1.09017	0.0356863	-0.0306485	0.943745	-0.0306485
Il17f	0.592126	0.532719	0.810303	3.7682	51.0358	214.147	3.62428	4.21172e-11	5.65748	3.42013e-44	2.0332	1.0005e-16	4.10897
Il2	88.4669	208.006	244.611	202.971	219.647	252.556	0.561406	0.00113371	0.746958	1.1672e-05	0.185552	0.257575	0.401656
Il2ra	231.903	120.698	89.1366	74.2416	57.1729	53.0502	-0.781051	3.83044e-05	-1.12856	8.3488e-09	-0.34751	0.0976939	0.34751
Ing4	18.1329	22.6285	22.5811	18.2898	30.1451	38.3942	0.535862	0.111419	0.710339	0.029899	0.174477	0.564783	0.380928
Insig1	70.684	51.3611	49.7176	51.617	28.7212	28.0061	-0.587696	0.016556	-0.672443	0.00646034	-0.0847468	0.74968	0.0847468
Irf8	59.635	18.1254	11.4157	21.2542	18.5905	21.9857	-1.14118	0.000224105	-1.29743	3.76222e-05	-0.156256	0.673195	0.156256
Isg20	6.16573	5.57319	10.021	6.24823	8.76835	17.4235	0.227015	0.692917	1.13562	0.0219037	0.908608	0.0574652	1.85614
Isoc2b	9.822	1.61446	7.41515	5.81834	1.94677	11.4758	-2.34502	0.00222702	0.145194	0.775008	2.49021	0.000853338	-2.0299
Itga3	22.389	18.7226	15.6206	26.3353	13.3877	14.4077	-0.574515	0.101701	-0.746319	0.0373412	-0.171804	0.660265	0.171804
Itgb3	12.2409	6.14884	4.50133	8.37418	2.67643	1.79566	-1.29656	0.0259204	-1.73166	0.00532223	-0.435097	0.570961	0.435097
Itm2a	236.813	314.038	470.744	296.695	295.062	369.11	0.200547	0.205775	0.635861	4.37991e-05	0.435314	0.00470152	0.899261
Jmjd6	56.4029	35.7536	38.3592	44.833	29.0893	32.6299	-0.626726	0.0171684	-0.550349	0.0337576	0.0763762	0.786027	-0.0763762
Kbtbd11	28.4116	9.57522	12.8878	18.0796	13.3553	10.2314	-1.05115	0.00626435	-1.01741	0.0075022	0.0337328	0.939866	-0.0337328
Khdrbs3	2.26491	4.53956	3.73296	1.00401	6.36418	7.80588	1.69047	0.0479867	1.91915	0.0192933	0.228684	0.712854	0.491718
Kifc3	8.53794	14.2341	28.8862	2.19575	15.8516	31.4811	1.57665	0.00177122	2.54217	4.78978e-09	0.965521	0.00454269	1.96552
Klhl6	15.5615	14.2935	17.6359	13.5151	33.2977	37.2777	0.750722	0.0385684	0.919096	0.00917911	0.168374	0.594096	0.368673
Lad1	73.8197	99.1893	42.6511	35.0576	29.9304	25.8533	0.251977	0.27284	-0.701462	0.00639055	-0.953438	0.000136952	0.206442
Ldha	2367.88	1258.22	1173.24	1473.12	672.572	756.319	-0.983075	2.51657e-12	-1.01281	5.55887e-13	-0.0297352	0.833333	0.0297352
Ldhb	29.0352	42.2652	54.0251	25.0793	50.7978	66.4905	0.789769	0.00431393	1.126	2.10707e-05	0.336236	0.159526	0.703968
Ldlr	21.9412	14.5576	11.8773	16.2859	7.16177	3.63012	-0.842693	0.037293	-1.35336	0.00192053	-0.510671	0.304834	0.510671
Litaf	18.4649	23.9805	28.4868	20.4034	29.8175	44.0293	0.512593	0.120619	0.895133	0.00412283	0.38254	0.187566	0.797577
Lonp1	102.313	65.4853	63.745	70.3915	45.4152	49.3044	-0.636116	0.00376431	-0.627486	0.00408766	0.00863041	0.970643	-0.00863041
Lpar6	3.1573	4.24627	5.60948	4.36857	12.0341	12.8568	1.18101	0.0615012	1.31864	0.0320665	0.137626	0.786455	0.307551
Lpxn	24.1149	26.5913	34.7655	30.987	46.2871	57.1704	0.394637	0.172317	0.716294	0.00953531	0.321657	0.220008	0.675294
Lrrc28	0.555862	4.22516	1.77407	2.69032	5.94828	3.7127	2.23813	0.0166778	1.23177	0.261136	-1.00635	0.185683	-2.00635
Lss	59.1624	24.7513	27.0595	36.8527	15.623	15.1571	-1.25176	1.86771e-05	-1.21152	2.83001e-05	0.0402424	0.906911	-0.0402424
Ly6d	0.732088	0.559526	2.81343	0.834673	0.838209	7.10865	-0.886864	0.564236	2.20773	0.0183378	3.0946	0.0042104	3.6428
Ly6e	102.921	165.686	91.4464	31.9322	106.527	129.602	1.01264	4.19964e-07	0.678502	0.000953676	-0.334134	0.0735191	-0.634923
Ly86	0.589249	0.750404	1.24256	0.569016	1.08494	5.03236	3.71228	0.0957642	5.1918	0.00431426	1.47952	0.159829	3.06448
Maf	0.615265	0.610727	0.720321	0.876973	3.96329	6.69529	1.84426	0.165424	2.59672	0.0269908	0.752465	0.387004	1.55982
Map3k7	15.9693	30.5872	28.3309	24.1375	33.7859	38.5476	0.683501	0.0304182	0.696725	0.0264759	0.0132236	0.963041	0.0576177
Mettl23	24.8859	29.2367	9.96989	25.8861	22.0023	13.7839	0.0079598	0.979798	-1.10525	0.00273666	-1.11321	0.00254588	1.09729
Mgarp	18.5025	1.95925	1.26007	1.98146	0.54312	0.451293	-3.21183	5.28606e-05	-4.13198	5.58902e-06	-0.920144	0.549019	0.920144
Mid1	2.95031	4.83034	8.26939	8.78518	14.1522	25.6115	0.663047	0.216113	1.42279	0.0026824	0.759744	0.0750757	1.55621
Mid1ip1	18.546	17.2636	9.69552	11.9823	9.20729	6.69206	-0.197339	0.627031	-1.01453	0.0272384	-0.817196	0.08489	0.817196
Mif	2026.95	1363.5	1294.17	1433.6	782.688	852.492	-0.680051	1.12852e-06	-0.708237	4.01822e-07	-0.0281865	0.841041	0.0281865
Mlf1	13.1666	22.4428	17.3461	11.5576	24.7627	18.055	0.972303	0.0095927	0.518338	0.194821	-0.453965	0.189161	-0.879271
Mmd	33.0999	52.0357	42.5899	38.9218	58.1492	53.8385	0.617889	0.0150296	0.390717	0.133289	-0.227172	0.346159	-0.423569
Mndal	19.3748	10.89	19.8623	24.7077	11.8904	23.5072	-0.890205	0.0211635	-0.0229284	0.945797	0.867277	0.0247719	-0.867277
Mov10	10.9284	3.50554	3.27036	3.91159	4.49737	3.06735	-1.07423	0.0938959	-1.32081	0.0466598	-0.246579	0.755538	0.246579
Mpp1	23.421	10.8812	10.5505	16.7491	10.1627	13.8477	-0.916629	0.0220041	-0.756139	0.0515029	0.16049	0.719905	-0.16049
Ms4a1	0.77601	1.74559	2.35138	0.552054	1.65462	9.05223	1.44836	0.305816	3.2362	0.00218822	1.78784	0.0327233	3.66231
Ms4a6c	7.13796	10.3881	10.592	6.98733	17.7567	14.1474	0.998853	0.0351415	0.747488	0.127853	-0.251365	0.549187	-0.473757
Mt1	31.1988	9.80791	10.5583	10.9465	3.70321	9.81215	-1.67165	0.000152313	-1.08713	0.00659543	0.584514	0.261304	-0.584514
Mt2	4.8023	5.5425	6.39317	2.83813	7.67786	12.769	0.582624	0.373232	1.20752	0.04038	0.624894	0.243906	1.28786
Mthfd1l	52.0542	40.4504	29.7595	40.8978	34.4431	26.0966	-0.321279	0.217229	-0.752709	0.00613565	-0.431429	0.132205	0.431429
Mvd	54.615	20.5063	21.9843	29.1219	11.0934	10.2981	-1.40832	8.88201e-06	-1.39252	9.61403e-06	0.0157927	0.967307	-0.0157927
Mxd4	10.4936	14.4263	17.8276	21.5158	52.5032	47.246	1.09263	0.000973175	1.0394	0.00176947	-0.0532303	0.8516	-0.0752566
Myc	99.1173	57.9577	67.5499	87.3561	49.7916	58.8666	-0.775504	0.000369666	-0.583649	0.0059779	0.191856	0.406335	-0.191856
Myh10	15.9157	5.52138	10.5758	14.9276	3.15923	7.55705	-1.92465	0.000261641	-0.882824	0.0464629	1.04182	0.0847194	-1.04182
Myh7	1.86321	4.64338	10.2499	2.90486	4.72189	10.7265	0.834769	0.284294	2.01185	0.00171834	1.17708	0.0357025	2.39947
Mzb1	0.84089	1.20215	3.97698	0.850241	0.496029	5.45926	-0.886774	0.564272	2.05866	0.0318329	2.94543	0.00787577	3.34181
Napsa	1.10681	1.60885	2.30517	0.883134	1.60897	7.62115	0.00710874	0.995761	2.05829	0.0318646	2.05119	0.0325401	4.22111
Ncf1	12.2519	4.8962	4.60971	8.81504	4.96807	6.63582	-1.05047	0.0546661	-1.08073	0.0478885	-0.0302668	0.962752	0.0302668
Ncoa7	8.53614	12.3439	18.2863	13.3208	14.8014	20.61	0.367667	0.399009	0.827699	0.0408418	0.460032	0.229365	0.953072
Ndrg1	30.6015	4.78825	4.02037	6.7074	4.07588	3.43262	-1.97302	7.04839e-05	-2.35801	7.03541e-06	-0.384991	0.593408	0.384991
Ndrg2	17.5619	4.16258	3.4412	7.5247	2.52117	4.26156	-1.96314	0.001002	-1.77634	0.00201614	0.186801	0.813584	-0.186801
Ndufv3	197.363	114.122	104.17	122.064	97.7267	120.359	-0.581561	0.00160064	-0.533788	0.00352997	0.0477722	0.803506	-0.0477722
Nefh	26.7328	16.3355	17.136	20.3028	12.2822	12.0216	-0.736072	0.0425601	-0.715874	0.0467755	0.0201976	0.959982	-0.0201976
Nnt	11.3038	15.9207	17.1883	10.3713	20.7674	18.6545	0.819692	0.0439501	0.709583	0.0849764	-0.11011	0.762061	-0.19028
Notch2	34.2447	17.5406	16.2403	15.7115	11.4289	8.94865	-0.796076	0.0269391	-0.988577	0.00733271	-0.192501	0.643444	0.192501
Npas4	7.61589	14.8854	13.8032	9.39795	22.8633	20.8661	1.24671	0.00374761	1.09792	0.0122072	-0.148792	0.68072	-0.267436
Nr4a2	28.7598	35.5469	20.153	24.4842	8.63121	10.5237	-0.291963	0.366094	-0.83955	0.0160314	-0.547587	0.132612	0.547587
Nr4a3	95.232	65.3041	42.2419	40.2382	24.0426	15.6345	-0.59172	0.0122798	-1.26283	8.68206e-07	-0.671107	0.0149954	0.671107
Nrn1	405.942	292.708	288.929	407.896	234.737	291.58	-0.61852	7.33319e-05	-0.511566	0.000952549	0.106954	0.501626	-0.106954
Nrp1	16.2769	4.82055	6.97996	17.1084	12.4811	11.3723	-0.942803	0.0311942	-0.891465	0.0389253	0.051338	0.918382	-0.051338
Nsdhl	31.6173	27.2515	16.5486	23.0947	22.4693	16.3556	-0.131969	0.673538	-0.774707	0.023699	-0.642738	0.0658254	0.642738
Nt5e	5.24727	5.81448	8.22668	7.01878	18.3122	31.6922	0.997308	0.0498171	1.66216	0.000275486	0.664847	0.0888042	1.36529
Ntn4	2.86781	5.15632	0.530269	4.95618	0.451293	0.468992	-0.652866	0.415203	-5.6197	0.000872228	-4.96683	0.00822049	4.96683
Odc1	534.884	275.013	332.217	291.005	159.825	199.12	-0.916234	7.48186e-09	-0.65703	2.47334e-05	0.259205	0.11129	-0.259205
P4ha1	31.3849	17.2366	18.0948	17.8505	11.6015	13.1907	-0.795989	0.0269558	-0.680197	0.0531843	0.115792	0.770366	-0.115792
Pced1b	27.7876	22.6737	18.2306	27.0172	15.7606	15.6184	-0.523597	0.111563	-0.756585	0.0256138	-0.232988	0.524621	0.232988
Pcgf5	39.9567	22.9088	19.8179	22.234	16.2381	13.4123	-0.658824	0.0392019	-0.928833	0.00499724	-0.270009	0.458424	0.270009
Pcyt2	73.5802	48.1526	47.7507	60.1646	40.2518	41.4538	-0.587111	0.0133766	-0.601094	0.0111443	-0.0139833	0.956127	0.0139833
Pdcd1	79.4271	121.31	138.296	115.495	178.529	206.242	0.63059	0.000783689	0.800859	1.50705e-05	0.17027	0.331816	0.372533
Pdgfb	23.566	36.5287	35.3878	34.428	78.655	89.1627	1.00448	0.000142912	1.0931	2.71742e-05	0.0886225	0.699436	0.209929
Pdk1	38.4815	6.81613	6.65833	16.4682	3.13154	5.29972	-2.40619	5.89486e-08	-2.30103	1.13211e-07	0.105157	0.868255	-0.105157
Pdzk1ip1	32.3004	13.3337	8.40472	9.42444	10.9516	3.04157	-0.76108	0.0489028	-1.90477	3.50968e-05	-1.14369	0.0273805	1.14369
Penk	32.601	90.7964	45.6134	11.3864	19.4296	31.268	1.36134	1.28445e-06	0.797171	0.00807783	-0.564169	0.0248887	-1.0976
Pfkl	110.316	62.2514	58.359	69.3676	31.0731	32.4971	-0.935114	3.14953e-05	-1.01204	7.45272e-06	-0.0769252	0.759395	0.0769252
Pfkp	109.634	53.3851	51.8014	49.0913	42.5106	48.0455	-0.725485	0.00146088	-0.68217	0.00253015	0.0433152	0.860013	-0.0433152
Pgam1	562.679	375.326	378.687	449.778	285.902	293.824	-0.605924	6.59349e-05	-0.611526	5.54052e-05	-0.00560211	0.971182	0.00560211
Pgap2	28.1684	20.5716	14.352	18.5339	16.5756	12.5574	-0.344513	0.318402	-0.841834	0.0230361	-0.497321	0.202506	0.497321
Pgd	101.524	70.9061	74.9691	106.769	52.2856	63.6283	-0.7488	0.00036152	-0.613317	0.00292567	0.135483	0.543209	-0.135483
Pgk1	1574.5	787.231	716.315	788.705	427.539	452.447	-0.950977	3.56328e-11	-1.03556	6.40961e-13	-0.0845846	0.562261	0.0845846
Pgm2	59.4657	25.0372	23.0204	27.8003	17.2598	21.6515	-1.04009	0.000418394	-1.00383	0.000582673	0.0362663	0.914378	-0.0362663
Phf20l1	17.2607	22.7857	23.2296	16.3402	31.3225	29.4856	0.715057	0.0356252	0.630156	0.0662226	-0.0849005	0.783815	-0.139348
Phgdh	265.854	141.647	148.65	181.906	77.0177	88.8986	-1.02988	7.06756e-09	-0.938589	9.68085e-08	0.0912891	0.630823	-0.0912891
Phlda3	24.1632	45.2739	44.5024	23.8454	45.9552	47.8953	0.92815	0.00110173	0.913181	0.00130146	-0.0149693	0.952474	0.000798021
Phyh	10.9606	20.0621	13.6816	11.7715	21.792	16.4761	0.871685	0.0246783	0.309307	0.461989	-0.562378	0.127121	-1.09671
Pianp	3.34084	4.85083	4.81869	0.451293	9.97949	9.86851	2.26743	0.00355918	2.23696	0.00407463	-0.0304764	0.954784	-0.0304764
Pik3r3	0.684909	1.2145	1.3809	1.46264	4.8873	4.11342	2.41002	0.0472766	2.12499	0.0934321	-0.285029	0.73907	-0.548063
Pim1	67.4401	22.7401	14.2018	14.2827	11.2171	11.2698	-1.24085	7.07737e-05	-1.71254	2.76557e-07	-0.471691	0.236573	0.471691
Pim2	131.588	68.9148	73.2077	80.3136	53.5513	57.3334	-0.781813	0.000194444	-0.720275	0.000523467	0.0615386	0.784711	-0.0615386
Pkm	1720.15	953.933	950.298	1097.42	552.168	576.468	-0.893981	3.00226e-10	-0.903086	1.9556e-10	-0.00910436	0.949366	0.00910436
Pmaip1	5.07289	9.20772	7.67943	3.53772	9.73189	8.37543	1.2384	0.0354187	0.870382	0.161547	-0.368019	0.469776	-0.709056
Pmm1	17.9975	12.1647	17.4939	23.181	9.1901	11.6982	-0.951862	0.0168077	-0.569648	0.127113	0.382213	0.376895	-0.382213
Pmvk	66.4681	36.0086	37.5338	40.9807	25.2203	32.464	-0.801257	0.00236527	-0.654417	0.0109892	0.146839	0.607207	-0.146839
Podnl1	6.035	6.45007	11.1918	4.706	9.15638	12.5699	0.58454	0.321961	1.16542	0.0295845	0.580885	0.233801	1.19756
Pop4	42.1259	16.16	28.7534	40.6121	29.3378	22.5738	-0.856147	0.00357422	-0.705607	0.0137451	0.15054	0.640683	-0.15054
Pou2af1	35.1657	56.9557	68.5333	60.1518	65.9478	76.0628	0.379836	0.109195	0.576304	0.0127016	0.196468	0.37482	0.423878
Ppic	8.56525	2.64349	4.92959	27.6725	3.26672	6.011	-2.75935	1.32716e-06	-1.67741	0.000432491	1.08194	0.146337	-1.08194
Prelid2	114.951	96.3423	58.3046	46.4098	53.8393	27.2688	-0.0938196	0.656545	-0.941528	4.85966e-05	-0.847709	0.000296368	0.847709
Prkcdbp	7.17228	6.41484	10.799	16.2942	29.5258	44.4082	0.609072	0.131196	1.22662	0.000831038	0.617545	0.065219	1.26962
Prrg4	20.3065	12.1227	4.46245	10.4158	6.53741	1.47147	-0.72395	0.100721	-2.56782	1.35138e-05	-1.84387	0.00546092	1.84387
Psap	37.9285	40.7579	42.1007	27.2792	53.6338	58.9279	0.538251	0.0432842	0.610497	0.0202825	0.0722462	0.768674	0.175869
Psmb8	237.42	187.394	139.514	135.49	81.2601	99.6214	-0.463528	0.00855527	-0.66551	0.000197987	-0.201982	0.27521	0.201982
Psrc1	25.6065	41.7418	49.1209	24.5252	46.7979	41.6627	0.866355	0.0023175	0.852686	0.00267164	-0.0136686	0.956938	0.00245106
Ptp4a3	21.897	28.7714	34.8206	33.4687	37.3662	56.964	0.269874	0.358739	0.71635	0.00952963	0.446476	0.0940547	0.925644
Pttg1	24.7364	62.5579	46.3455	34.6222	34.984	43.7588	0.724381	0.00726847	0.585308	0.0324107	-0.139072	0.57694	-0.247132
Puf60	56.8	40.3221	50.9575	70.0048	31.2095	28.1918	-0.829298	0.000855811	-0.70476	0.00384236	0.124539	0.645065	-0.124539
Rab11fip4	10.532	21.0535	13.0986	23.0521	35.3165	32.7268	0.767362	0.0231097	0.452979	0.197923	-0.314383	0.318209	-0.598176
Ramp1	7.57485	17.1989	7.13785	20.7278	77.493	81.1819	1.74722	3.33744e-08	1.61864	4.43299e-07	-0.128586	0.609451	-0.223743
Rasl11b	3.87878	7.56249	3.81693	4.4505	15.7322	12.265	1.51157	0.00732362	0.961904	0.116391	-0.549671	0.252565	-1.07323
Rbl2	13.4398	16.0147	22.6818	11.8386	28.7792	35.1775	0.850928	0.0234173	1.15991	0.00118374	0.308978	0.327221	0.650015
Rbmx	20.1202	27.7552	32.1216	19.3801	11.6215	37.4234	0.00832233	0.981112	0.797309	0.0108324	0.788987	0.0116968	1.61211
Rcsd1	43.5733	32.3366	30.2579	30.4062	15.6907	19.1168	-0.625273	0.0357196	-0.595592	0.0435846	0.0296809	0.926616	-0.0296809
Rdh11	61.3997	37.1755	44.9296	49.3432	35.2033	29.5914	-0.602665	0.0177177	-0.592614	0.0190551	0.0100518	0.97063	-0.0100518
Rdh12	4.67472	6.52913	13.0436	5.91286	13.227	18.149	0.922167	0.0990699	1.59309	0.00147658	0.670924	0.120991	1.37719
Rgcc	85.9672	14.8537	21.4653	102.154	112.801	37.3678	-0.549011	0.00943512	-1.71759	1.60491e-12	-1.16858	5.94635e-06	1.16858
Rgs1	101.349	112.566	130.479	74.2809	155.078	186.119	0.61556	0.00141786	0.826739	1.26582e-05	0.211179	0.238818	0.454264
Rgs11	6.58303	1.56283	1.16707	1.72054	1.60154	1.0149	-1.90752	0.0528556	-1.93576	0.049051	-0.0282389	0.983152	0.0282389
Rgs16	36.9265	42.5753	39.6137	37.6005	72.8559	76.9818	0.641648	0.0105454	0.622198	0.013032	-0.0194498	0.933116	-0.00695882
Rgs2	13.6632	18.7732	25.5556	20.4037	28.565	34.1385	0.515488	0.141008	0.811719	0.0152059	0.296231	0.339919	0.624285
Rmrp	5.34112	210.135	76.1321	1.64348	0.451293	2.44669	5.10373	6.4876e-42	3.64653	2.01897e-15	-1.4572	1.26052e-10	-2.88604
Rnf130	8.62458	8.69365	9.79215	7.33574	17.4271	19.1832	0.737899	0.123168	0.919937	0.0470778	0.182038	0.659189	0.396162
Rnf149	11.6271	11.9899	13.4906	13.8656	25.1017	30.428	0.569714	0.145502	0.754346	0.0466597	0.184632	0.595901	0.401443
Rorc	8.99892	12.8093	14.6289	20.0847	50.7626	66.6658	1.14402	0.000716111	1.43244	9.7801e-06	0.288417	0.294589	0.610345
Rprl3	3.93951	49.2795	44.2099	0.451293	0.451293	5.95777	3.57036	1.19002e-10	3.57008	1.05851e-10	-0.000284974	0.999277	0.0288614
Rragd	6.8455	2.27905	1.67767	3.39836	1.51001	0.929895	-1.67572	0.0500924	-2.2518	0.0159042	-0.576082	0.638423	0.576082
Rras2	32.2518	19.0947	18.3947	17.3553	10.7175	16.4838	-0.745563	0.0368029	-0.547898	0.112153	0.197665	0.608437	-0.197665
Rtfdc1	34.5188	34.8301	50.9427	34.508	42.0495	53.3813	0.18637	0.496212	0.588865	0.0232148	0.402495	0.112252	0.836148
Runx3	12.6419	6.00774	4.34609	9.51218	3.55392	4.31138	-1.19973	0.0322193	-1.39651	0.0151737	-0.196775	0.778385	0.196775
Rxra	9.28349	15.0527	15.833	12.6209	22.1429	21.6299	0.819678	0.043954	0.789119	0.0525415	-0.0305586	0.932238	-0.0305586
S100a11	166.642	102.047	113.394	138.533	97.8565	144.261	-0.596055	0.00140693	-0.266483	0.140559	0.329572	0.083226	-0.329572
S100a4	3.8815	5.63282	5.8869	28.2985	33.0264	48.9136	0.253694	0.491376	0.75255	0.0275126	0.498856	0.129587	1.03229
Sap25	4.20608	5.4298	5.02205	3.97817	12.3588	13.8911	1.07918	0.0739376	1.20738	0.0404038	0.128201	0.795597	0.288666
Sc5d	43.8404	25.7706	22.796	37.9622	16.1671	24.5947	-0.954476	0.00136364	-0.823716	0.00466601	0.13076	0.694326	-0.13076
Scd1	47.8732	9.75978	6.73097	18.2488	2.04653	2.77485	-2.43569	2.47779e-09	-2.72489	1.40218e-10	-0.289192	0.641543	0.289192
Scd2	297.166	126.288	103.784	164.057	41.566	38.3258	-1.45481	2.68988e-15	-1.71736	8.00643e-20	-0.262548	0.214692	0.262548
Scn1b	4.18556	32.5962	13.7997	2.83678	32.671	36.6236	3.17023	7.37836e-12	2.78296	1.27015e-08	-0.387271	0.199008	-0.743415
Sectm1a	15.8998	0.619399	30.8642	0.451293	7.88527	10.8052	-0.978324	0.110232	1.3617	0.00122551	2.34002	2.09357e-06	1.77569
Serpinb6a	22.83	11.5613	12.2312	6.76427	4.84687	9.02166	-0.892326	0.0488775	-0.533853	0.20995	0.358473	0.464995	-0.358473
Serpinb6b	39.6915	16.1371	12.9209	12.3956	3.63925	4.13332	-1.40884	0.000290886	-1.59788	6.02284e-05	-0.189041	0.702425	0.189041
Serpinc1	3.5818	0.491694	5.63488	8.34615	0.451293	3.40544	-6.07106	0.000111079	-0.473563	0.477967	5.59749	0.00102005	-5.59749
Sesn2	9.32248	14.6129	16.4946	11.1732	24.0662	24.0706	0.927674	0.0233192	0.970676	0.0164658	0.0430012	0.902627	0.117002
Sesn3	25.8837	31.0148	35.6147	34.6352	68.4854	49.9693	0.727529	0.0066353	0.477631	0.0830359	-0.249898	0.319371	-0.469864
Sfi1	7.10092	9.23872	9.53355	7.4511	29.8718	29.2551	1.47402	0.00082684	1.40547	0.00153555	-0.0685498	0.846185	-0.106024
Sfn	14.7765	3.74336	6.71075	8.70016	1.94465	1.89292	-1.90212	0.00159466	-1.52647	0.00673381	0.375654	0.624869	-0.375654
Sh3bp1	57.9411	40.9011	34.6742	47.2113	36.9673	31.1302	-0.420354	0.0958006	-0.713159	0.00631366	-0.292806	0.288014	0.292806
Sigmar1	60.3076	48.0123	45.4023	56.1477	36.1812	32.656	-0.456824	0.0620084	-0.612044	0.013841	-0.15522	0.555407	0.15522
Sirt3	5.34854	4.00136	3.29085	6.21227	3.51753	0.452284	-0.632286	0.358598	-1.83975	0.0276553	-1.20746	0.19286	1.20746
Slc15a2	2.091	0.458223	0.469626	1.93643	3.11038	0.502651	-0.388833	0.712168	-4.64878	0.0182245	-4.25995	0.040352	4.25995
Slc16a3	117.441	41.1709	17.2667	30.0801	8.26693	3.77366	-1.57372	1.63646e-09	-2.82012	9.98676e-20	-1.2464	0.00114016	1.2464
Slc25a1	56.3387	38.8398	33.8923	41.0169	21.8213	28.8604	-0.659602	0.0139014	-0.643887	0.0156513	0.0157153	0.956888	-0.0157153
Slc2a1	102.159	41.9543	41.568	48.3903	29.1909	27.7193	-1.06972	1.00255e-05	-1.14082	2.77277e-06	-0.0710965	0.797681	0.0710965
Slc38a6	4.51594	7.85691	8.2216	5.71113	15.9102	12.92	1.40594	0.00965715	1.18427	0.0345519	-0.221677	0.62032	-0.414322
Slc39a10	19.321	10.5015	12.0592	17.0735	9.88546	11.693	-0.835099	0.0436279	-0.665275	0.0970875	0.169824	0.710102	-0.169824
Slc7a5	73.2691	51.6886	57.0556	61.8417	37.7885	35.2524	-0.592159	0.0122153	-0.573822	0.014563	0.0183363	0.942038	-0.0183363
Slco4a1	24.4146	24.7224	22.5911	57.3127	18.2618	20.5856	-0.902608	0.00239767	-0.966971	0.00120299	-0.0643629	0.849381	0.0643629
Snhg6	167.401	230.638	291.185	200.786	78.4784	320.751	-0.245703	0.157275	0.710354	1.44002e-05	0.956057	1.00874e-08	1.19848
Snhg9	7.14748	3.03235	15.8141	2.73693	8.14035	23.4045	0.142661	0.821951	1.92245	5.44801e-05	1.77979	0.000134974	3.60576
Snn	4.85769	5.89806	7.95268	5.41294	18.4687	17.0023	1.25638	0.0178156	1.28423	0.0145762	0.0278558	0.948393	0.0867495
Socs1	33.0555	11.5127	12.2315	11.8562	7.16548	9.84165	-1.3065	0.00122312	-1.04972	0.00654934	0.256778	0.586915	-0.256778
Socs2	14.024	1.51994	2.31282	4.1309	1.38505	0.451293	-3.06114	0.000171767	-3.0892	0.000144572	-0.0280515	0.983255	0.0280515
Socs3	5.64997	1.39255	1.48879	2.26653	0.688079	1.31935	-2.61292	0.0260168	-1.74728	0.0849244	0.865643	0.573474	-0.865643
Spib	2.14646	8.67454	9.55215	4.87327	5.26244	7.82293	0.885354	0.181448	1.23779	0.047027	0.352434	0.513885	0.739457
Spp1	2.19895	2.29355	4.30885	5.68266	3.42134	15.164	-0.464657	0.573888	1.39571	0.0216168	1.86037	0.00462483	2.37163
Sqle	77.4378	50.9657	48.6717	57.4955	30.9925	32.2358	-0.699254	0.00358781	-0.764822	0.00151421	-0.0655674	0.802782	0.0655674
St6gal1	28.3091	4.75195	4.95102	2.63988	0.451335	9.50968	-2.53851	1.7474e-05	-1.11386	0.0170105	1.42466	0.0431975	-1.42466
Stag3	0.825114	3.28725	0.919099	0.764488	6.19542	1.07257	2.08865	0.0292696	-0.0211302	0.98739	-2.10978	0.0274648	-4.23744
Stard4	46.7035	27.0246	28.7054	31.15	19.2426	17.6861	-0.733346	0.0132374	-0.794816	0.00749761	-0.0614701	0.851964	0.0614701
Stat1	18.2278	18.9582	21.3081	18.4263	34.3136	42.7756	0.562998	0.0931563	0.802771	0.0129339	0.239772	0.421165	0.511852
Stat4	56.481	57.8219	28.8968	32.1692	26.4622	20.7211	-0.0585164	0.819791	-0.83596	0.00322138	-0.777444	0.00660132	0.777444
Stat5a	23.3696	2.22679	15.5548	26.3562	2.83924	11.1555	-3.24307	8.61982e-10	-0.932306	0.0107549	2.31077	0.000156757	-2.31077
Stat5b	29.6025	10.3292	6.82932	27.5157	13.1172	4.52413	-1.27019	0.000511033	-2.35288	4.61287e-08	-1.08269	0.0386033	1.08269
Stc2	28.4897	1.86111	2.689	4.50508	0.807048	0.475876	-3.3378	3.02766e-07	-3.9137	3.21332e-08	-0.575895	0.638526	0.575895
Stk39	60.5711	30.5136	25.4136	24.6107	10.4106	11.6579	-1.05927	0.0004094	-1.24067	5.09289e-05	-0.181398	0.609886	0.181398
Swap70	6.18403	6.9593	10.6154	4.6792	5.44369	13.1969	0.26675	0.667693	1.16525	0.0296089	0.898503	0.0802438	1.8371
Syce2	23.2742	12.0395	7.12076	13.7138	6.37561	5.75714	-0.985656	0.0200463	-1.48047	0.0011675	-0.494811	0.352884	0.494811
Tdgf1	0.705268	0.680735	1.56406	1.69747	2.78436	6.25513	1.44821	0.305863	2.59672	0.0269908	1.14851	0.216211	2.3709
Tesc	52.5195	24.8779	28.7453	35.9334	10.3664	13.3662	-1.31798	1.60943e-05	-1.08582	0.000221683	0.232157	0.512048	-0.232157
Tfe3	12.9062	29.9641	24.5608	15.9022	39.1001	18.0423	1.2532	0.000168635	0.509558	0.16709	-0.74364	0.0157318	-1.45985
Tg	9.73412	6.46867	3.69932	3.75706	1.65684	1.73725	-0.975542	0.1343	-1.47746	0.0357129	-0.501917	0.543332	0.501917
Thy1	346.595	106.251	56.1454	165.88	56.554	82.6587	-1.65106	2.17161e-19	-1.91549	1.90321e-24	-0.264428	0.215499	0.264428
Tigit	29.5653	14.3364	6.67402	5.37531	5.30207	3.7783	-0.82636	0.0512622	-1.7715	0.000301842	-0.945137	0.0907792	0.945137
Tkt	189.788	129.876	121.144	151.768	96.2884	87.3961	-0.589072	0.0011703	-0.738259	5.69953e-05	-0.149187	0.437766	0.149187
Tmc6	28.572	46.0652	48.4183	41.2555	63.9224	67.1354	0.678868	0.00804203	0.71179	0.00512319	0.0329219	0.888023	0.0970522
Tmc8	13.6858	19.9178	23.0472	16.4552	15.8308	25.2854	0.318221	0.403663	0.70085	0.0506936	0.382629	0.263653	0.797667
Tmem154	11.0061	14.4773	16.9038	14.4635	29.6649	27.5014	0.785566	0.0382199	0.787948	0.0367908	0.00238105	0.994339	0.0355479
Tmem19	12.8149	18.8296	22.4486	13.9054	29.0016	34.8209	0.833532	0.022091	1.04961	0.00284161	0.21608	0.487459	0.464007
Tmem194b	3.49606	4.81441	3.39493	2.19797	10.6326	1.72482	1.56109	0.0242444	-0.0220775	0.980258	-1.58317	0.0221915	-3.12398
Tmem97	89.0416	56.0796	53.9917	69.1234	31.1054	29.5146	-0.85128	0.000236334	-0.948607	4.82739e-05	-0.097327	0.705944	0.097327
Tnfrsf13c	18.0204	26.4272	23.0354	15.9327	26.9268	32.8696	0.64556	0.0571886	0.693572	0.0388619	0.0480121	0.875335	0.127447
Tnfrsf14	12.4788	19.3091	15.9838	12.6455	51.7065	20.8611	1.54437	8.11766e-06	0.597842	0.130209	-0.946524	0.00268039	-1.86635
Tnfrsf19	0.527036	4.51412	6.83785	0.617142	1.70529	5.93084	4.96674	0.00859339	6.28634	2.91741e-05	1.3196	0.0656121	2.69811
Tnfrsf9	125.696	66.8749	37.9203	38.7042	34.0751	26.8663	-0.681753	0.00239354	-1.347	2.97526e-08	-0.665245	0.0113935	0.665245
Tnfsf4	16.3162	31.9275	55.2596	25.7667	52.2419	49.6061	1.00433	0.000710451	1.28251	7.03763e-06	0.278174	0.264701	0.586296
Tpi1	1023.53	524.226	464.261	516.29	206.046	225.123	-1.06576	8.61533e-13	-1.17732	3.75269e-15	-0.111561	0.468432	0.111561
Trappc6a	53.7441	41.8761	30.1808	25.8586	20.7753	20.3286	-0.335761	0.223778	-0.698632	0.0155811	-0.362871	0.230242	0.362871
Trat1	12.2457	10.1147	9.6745	15.8156	4.04974	3.54368	-0.983589	0.0380851	-1.23306	0.0120209	-0.249476	0.664249	0.249476
Trib3	5.95979	1.22183	1.14963	1.99288	2.16863	1.27611	-1.35976	0.131017	-1.93576	0.049051	-0.575992	0.638473	0.575992
Trmt1	14.294	23.753	11.2992	28.7784	21.2845	6.0855	0.0733557	0.826201	-1.35233	0.00105736	-1.42569	0.000489001	1.21339
Tsc22d1	3.72557	8.58175	12.3881	7.51515	13.0942	25.4615	0.930115	0.0818977	1.7111	0.000284618	0.780985	0.055057	1.59812
Ttyh3	41.2247	35.2388	20.1355	20.9815	23.191	20.0178	-0.0880982	0.764867	-0.653184	0.0397824	-0.565086	0.0792195	0.565086
Twist1	5.93662	7.17871	35.0913	21.9242	11.7492	34.3639	-0.547731	0.215655	1.27366	0.00014933	1.82139	6.37296e-07	2.0271
Ubxn11	8.41103	13.802	10.5564	7.47146	18.8699	18.168	1.13631	0.01158	0.869689	0.0625126	-0.266623	0.495573	-0.503662
Vat1	23.4954	13.0973	8.02179	14.2625	7.13486	9.16622	-0.874301	0.0335956	-1.13731	0.00766749	-0.263005	0.590744	0.263005
Vax2	1.36827	2.30819	1.84026	2.35648	9.97354	12.0675	1.94936	0.0173655	2.13819	0.00689738	0.188823	0.742574	0.411215
Vegfa	6.6984	1.98949	1.03276	2.23971	0.451298	0.921245	-1.90743	0.0528671	-1.93576	0.049051	-0.0283292	0.983102	0.0283292
Wnt10b	10.7126	7.89018	6.58584	14.5953	2.9662	3.88834	-1.106	0.0330513	-1.27149	0.0164366	-0.165493	0.794024	0.165493
Xcl1	19.9076	26.4519	34.7252	26.6085	58.5173	58.5188	0.873122	0.00271182	0.988737	0.000543319	0.115615	0.649418	0.262457
Xlr4b	18.0344	25.8129	20.6013	16.1037	29.3248	23.1951	0.698763	0.0380603	0.314302	0.375326	-0.384461	0.230379	-0.739556
Ydjc	30.4969	22.6501	23.5351	31.193	14.2403	14.8022	-0.750096	0.0213976	-0.702533	0.0292134	0.0475627	0.894736	-0.0475627
Ypel3	19.8041	21.918	21.5125	30.5486	67.5337	61.8643	0.836145	0.0031578	0.703798	0.0142036	-0.132347	0.606428	-0.233041
Ywhaz	87.8494	69.1058	71.5442	89.3215	44.1645	53.7272	-0.638177	0.00337015	-0.52296	0.0145745	0.115218	0.615776	-0.115218
Zdhhc18	52.047	33.0091	27.213	28.3201	25.5352	23.8623	-0.455145	0.104679	-0.670651	0.0197538	-0.215506	0.48161	0.215506
Zfp36l1	71.4729	96.5915	106.662	103.058	169.339	179.043	0.612922	0.00151419	0.68584	0.00034551	0.0729173	0.687805	0.177887
Zfp383	1.39088	6.17834	3.7555	1.0309	5.85883	5.64132	2.4973	0.00531497	2.05866	0.0318329	-0.438646	0.490724	-0.853683
Zhx2	7.20027	1.51309	1.35415	13.9061	2.71067	1.83769	-2.73363	0.000145112	-2.76266	0.00011957	-0.0290306	0.979378	0.0290306
