# Supplementary material for: Signal transducer and activator of transcription 5 (STAT5) paralog dose governs T cell effector and regulatory functions
Source: eLife. 2016 Mar 21;5:e08384. doi: 10.7554/eLife.08384 (PMC4856466; doi:10.7554/eLife.08384)
Supplement: Supplementary file 4. — Spreadsheet lists STAT5 paralog-specific genes for all relevant cell types and experimental conditions. DOI: http://dx.doi.org/10.7554/eLife.08384.026 [file elife-08384-supp4.xlsx]

## Sheet: Naive CD4 T Cells
Cell Type	Naïve CD4+ CD44low CD25- cells
Culture Conditions	Ex vivo
Mouse Gene Symbol	Wild Type: Stat5a+/+ Stat5b+/+ (RPKM Replicate 1)	STAT5A-deficient: Stat5a-/- Stat5b+/- (RPKM Replicate 1)	STAT5B-deficient: Stat5a+/- Stat5b-/- (RPKM Replicate 1)	Wild Type: Stat5a+/+ Stat5b+/+ (RPKM Replicate 2)	STAT5A-deficient: Stat5a-/- Stat5b+/- (RPKM Replicate 2)	STAT5B-deficient: Stat5a+/- Stat5b-/- (RPKM Replicate 2)	Wild Type: Stat5a+/+ Stat5b+/+ (RPKM Replicate 3)	STAT5A-deficient: Stat5a-/- Stat5b+/- (RPKM Replicate 3)	STAT5B-deficient: Stat5a+/- Stat5b-/- (RPKM Replicate 3)	Log2 Fold Change (STAT5A-deficient ÷ WT)	p Value (STAT5A-deficient vs WT)	Log2 Fold Change (STAT5B-deficient ÷ WT)	p Value (STAT5B-deficient vs WT)	Log2 Fold Change (STAT5B-deficient ÷ STAT5A-deficient)	p Value (STAT5B-deficient vs STAT5A-deficient)	Paralog Specificity
Akr1b3	10.2155	17.3952	10.8051	9.06776	16.7926	9.04986	10.9711	21.6165	13.5031	0.893501	0.00637119	0.156517	0.670515	-0.736984	0.0204462	STAT5A
Apobec3	32.0119	0.232436	23.8857	18.8138	17.3261	21.4384	19.1469	0.233374	14.4954	-2.03511	1.03737e-08	-0.268225	0.313433	1.76689	1.81415e-06	STAT5A
Apol7e	43.8195	1.15295	27.0306	23.4972	25.7826	34.3306	19.0792	1.09059	28.8189	-1.61711	8.42655e-08	0.0429229	0.852799	1.66004	2.81276e-08	STAT5A
Atp6v1d	41.0823	25.3034	59.5737	42.3733	29.1202	41.5259	49.1547	28.7176	48.8193	-0.671988	0.00175321	0.171062	0.366012	0.84305	5.44974e-05	STAT5A
Bambi-ps1	20.118	15.6204	28.1648	25.3881	14.7671	23.29	32.9669	17.4454	25.2375	-0.70222	0.0099047	-0.0605901	0.804949	0.64163	0.0191651	STAT5A
Camk2b	1.93143	0.232382	2.14034	0.232369	0.232369	2.32572	3.17955	0.232513	0.396925	-4.96284	0.00850326	-0.332497	0.721576	4.63034	0.0192456	STAT5A
Ccdc69	15.9141	26.0357	12.5636	14.9837	23.3722	14.5961	13.6297	25.6301	13.6065	0.731681	0.00868312	-0.122073	0.701404	-0.853754	0.00257167	STAT5A
Ctse	73.4106	74.5823	17.0498	70.4954	137.887	147.134	69.1764	132.767	13.3444	0.702233	2.02438e-06	-0.282792	0.0901428	-0.985025	1.17511e-10	STAT5A
Dnah8	19.7008	82.0137	73.0194	19.3352	41.4941	23.4107	51.8608	80.8292	21.9669	1.15999	1.77649e-09	0.35243	0.102049	-0.807556	9.5683e-06	STAT5A
Glo1	19.4142	49.0836	40.3023	18.6812	32.327	19.6234	36.3905	49.3135	18.9607	0.808158	0.000254883	0.071539	0.77132	-0.736619	0.000717131	STAT5A
Gm14085	21.1748	14.0125	23.8908	35.0199	18.3243	40.2743	35.9697	14.6062	14.5388	-0.97027	0.000234082	-0.242134	0.301898	0.728136	0.0076253	STAT5A
Gm5779	70.4356	107.386	11.9955	71.2327	69.1759	64.7993	20.2461	103.148	74.8716	0.792121	9.58914e-07	-0.106885	0.555884	-0.899007	3.80452e-08	STAT5A
H60b	1.47225	12.9244	7.10896	1.52929	6.2772	1.06454	6.65958	8.37453	5.26303	1.41468	0.00506286	0.350219	0.559956	-1.06446	0.0246721	STAT5A
Hectd2	1.48004	0.232448	1.42662	1.48806	0.232887	1.68082	2.03054	0.232702	1.42808	-4.65238	0.0185616	-0.0221487	0.982012	4.63023	0.0192489	STAT5A
Ly6c2	94.1307	11.5	100.389	60.6527	98.7416	113.338	29.0544	4.09647	50.3621	-0.695197	0.000209353	0.49558	0.00185275	1.19078	1.08705e-11	STAT5A
Lypd6b	8.66762	5.82208	7.31985	12.0263	2.5448	8.70719	10.0162	2.06805	9.96382	-1.48416	0.00187503	-0.275285	0.478999	1.20888	0.0152025	STAT5A
Map7	7.85775	0.612335	3.92525	5.84646	2.82979	6.86245	3.38951	0.394884	4.79526	-2.0461	0.00342951	-0.109268	0.828229	1.93683	0.00637446	STAT5A
Mnda	17.9626	31.8369	5.71642	19.0565	31.9814	30.7718	16.9662	32.9028	20.9252	0.839813	0.000883789	0.0791624	0.779976	-0.760651	0.00219905	STAT5A
Msgn1	0.232369	1.54923	0.339572	0.788372	1.59432	0.422641	0.515278	2.62062	0.903342	1.72302	0.0879591	-0.913475	0.551183	-2.6365	0.0236986	STAT5A
Nsg2	72.8249	26.1387	81.7282	71.4241	19.7919	94.382	128.096	26.727	46.8202	-1.90011	3.06255e-23	-0.309609	0.0424375	1.5905	1.24013e-15	STAT5A
Oasl2	3.0303	0.626385	8.2093	2.61419	3.44258	3.94663	3.67378	0.380214	1.60901	-1.29048	0.103958	0.456222	0.439623	1.7467	0.0171837	STAT5A
Pydc3	62.9192	29.1184	125.656	62.9515	32.9379	32.9313	53.727	25.1784	53.8515	-1.05083	1.38375e-07	0.223004	0.179689	1.27383	4.1858e-11	STAT5A
Rabgap1l	15.2836	22.1388	14.4737	9.63504	21.0698	10.3227	13.4046	16.8498	13.0395	0.653199	0.0322302	-0.0611987	0.857624	-0.714398	0.0198906	STAT5A
Rhob	4.11308	17.3642	2.94473	6.09886	39.791	5.61555	5.62623	22.0082	4.70439	2.28778	6.90672e-11	-0.213432	0.68576	-2.50121	4.48374e-12	STAT5A
Rpl26	4.85547	4.39166	4.26227	6.81588	14.229	7.87042	10.0309	18.7795	9.847	0.742109	0.0558948	-0.023327	0.957624	-0.765436	0.0485302	STAT5A
Sgk1	34.125	69.2798	46.0939	37.0598	54.6053	36.1408	37.7261	71.5009	49.4135	0.84268	6.57974e-06	0.241705	0.2334	-0.600975	0.000837135	STAT5A
Smc6	34.1588	114.126	26.2532	36.1958	117.672	27.3415	41.2009	117.254	35.531	1.64762	8.31288e-23	-0.341809	0.119215	-1.98943	7.8107e-30	STAT5A
Snhg9	11.0308	4.13367	4.04351	16.0455	6.68816	18.2707	7.77562	1.559	17.2707	-1.42067	0.00143504	0.132078	0.700633	1.55274	0.000354338	STAT5A
Tnip1	22.3012	40.1897	25.4553	27.0022	44.2356	20.4108	18.5153	29.5967	25.844	0.74051	0.00138218	0.0393703	0.878196	-0.70114	0.00222488	STAT5A
Tspan9	8.6012	2.55242	12.7134	5.14013	6.0265	24.3684	8.81132	4.41332	11.2053	-0.818735	0.0964051	1.03311	0.0042693	1.85184	7.68417e-06	STAT5A
Xaf1	10.131	45.3771	12.7993	10.7511	25.266	12.7454	8.96884	36.8122	10.3226	1.82618	1.09025e-10	0.239029	0.51023	-1.58715	4.79155e-09	STAT5A
Arhgap31	3.40034	7.42285	1.37117	3.73859	7.64602	1.3563	8.02909	1.21618	1.70419	0.0883998	0.864733	-1.88655	0.00877874	-1.97495	0.00533679	STAT5B
Atn1	51.2605	49.1726	30.7096	50.2291	63.7783	28.8143	51.1289	56.6796	18.0205	0.157569	0.380116	-0.98339	3.27269e-06	-1.14096	3.33386e-08	STAT5B
Atp9a	3.68118	3.32343	8.40175	3.43746	2.59163	6.65823	2.57978	1.87015	9.14848	-0.319369	0.63579	1.22637	0.0181959	1.54574	0.00475976	STAT5B
Cish	12.1319	8.965	5.87981	8.68944	13.3693	7.33828	8.4845	10.0615	4.144	0.137856	0.714013	-0.787347	0.071587	-0.925203	0.0302247	STAT5B
Eomes	1.44789	1.10105	4.2832	1.28789	1.59554	11.6703	1.28706	1.14215	5.26674	0.392765	0.70804	2.71827	0.000128705	2.3255	0.00047029	STAT5B
Fabp5	2.95861	2.03811	4.93641	2.17307	3.26575	5.86171	3.72382	2.24195	6.8282	-0.358539	0.615387	0.963923	0.0909661	1.32246	0.0289236	STAT5B
Folr4	48.9546	44.7554	79.1554	62.4712	63.9728	92.1691	44.0869	54.7272	94.4011	0.0779651	0.665097	0.750035	5.07997e-06	0.67207	3.57457e-05	STAT5B
Fosb	5.99862	2.19519	1.20199	21.467	24.5373	8.29582	14.2414	15.1743	11.1232	0.0306692	0.924896	-1.05289	0.00656923	-1.08356	0.00491138	STAT5B
Gm590	7.7075	3.47316	13.2917	6.25299	7.15932	15.9971	7.0207	4.64047	13.5604	-0.484374	0.319263	1.00519	0.00800075	1.48956	0.000285864	STAT5B
Golm1	16.4646	13.5997	7.68327	15.1065	12.0235	6.71135	12.169	9.93852	4.66352	-0.258496	0.438374	-1.12052	0.00344417	-0.862028	0.0309305	STAT5B
Heatr5a	6.40395	13.7244	6.26519	6.8776	6.65492	4.43636	9.84486	12.118	4.4727	0.514461	0.192275	-0.732383	0.129958	-1.24684	0.00496733	STAT5B
Itm2a	49.7731	48.8559	81.797	56.0055	43.879	81.1051	54.9799	66.7113	157.129	-0.011812	0.947567	0.964585	1.00171e-09	0.976397	6.54894e-10	STAT5B
Litaf	1.59912	1.29049	4.90302	3.15119	1.3024	4.21875	1.04062	2.20467	5.26432	-0.568849	0.524941	1.17739	0.0773944	1.74624	0.0172146	STAT5B
Mid1	5.10248	3.11482	19.2936	5.87009	4.86575	0.232707	1.21253	3.44083	6.16794	-0.126955	0.83203	1.02666	0.0370426	1.15361	0.0217277	STAT5B
Ppp3cc	27.4692	22.0007	43.2092	25.9941	34.7989	68.8148	25.1122	27.9152	39.1182	0.120071	0.61591	0.928834	1.15632e-05	0.808763	9.96196e-05	STAT5B
Sidt1	47.8576	41.6535	87.3753	41.5851	33.8633	108.129	28.9582	49.3374	70.4294	0.0685512	0.733121	1.13227	6.73194e-11	1.06372	5.8632e-10	STAT5B
Slc15a2	5.62518	21.329	0.252834	6.68602	12.4181	0.256585	24.7663	0.282236	0.323864	-0.206862	0.554988	-7.84877	4.97973e-13	-7.64191	1.63245e-11	STAT5B
Tdgf1	2.1778	1.94327	6.85006	1.31007	2.43226	12.2052	2.02051	1.7576	8.65362	0.252005	0.766789	2.42391	3.89468e-05	2.17191	0.000120058	STAT5B
Trim12a	41.7163	46.2153	4.87219	42.8198	44.3371	3.78786	35.4565	43.3047	47.4871	0.145127	0.463832	-1.12207	2.69016e-06	-1.26719	6.04803e-08	STAT5B
Trmt1	13.854	7.42102	9.1414	13.8888	23.5048	5.01501	17.5723	17.7366	8.35493	0.0868939	0.776185	-1.08146	0.00335184	-1.16835	0.00129959	STAT5B

## Sheet: CD25+ NRP1+ Treg Cells
Cell Type	Naïve CD4+ CD25high NRP+ cells
Culture Conditions	Ex vivo
Mouse Gene Symbol	Wild Type: Stat5a+/+ Stat5b+/+ (RPKM Replicate 1)	STAT5A-deficient: Stat5a-/- Stat5b+/- (RPKM Replicate 1)	STAT5B-deficient: Stat5a+/- Stat5b-/- (RPKM Replicate 1)	Wild Type: Stat5a+/+ Stat5b+/+ (RPKM Replicate 2)	STAT5A-deficient: Stat5a-/- Stat5b+/- (RPKM Replicate 2)	STAT5B-deficient: Stat5a+/- Stat5b-/- (RPKM Replicate 2)	Log2 Fold Change (STAT5A-deficient ÷ WT)	p Value (STAT5A-deficient vs WT)	Log2 Fold Change (STAT5B-deficient ÷ WT)	p Value (STAT5B-deficient vs WT)	Log2 Fold Change (STAT5B-deficient ÷ STAT5A-deficient)	p Value (STAT5B-deficient vs STAT5A-deficient)	Paralog Specificity
AA465934	6.5485	51.0421	4.0809	7.25141	40.5288	7.36331	2.63047	5.14e-13	-0.450737	0.439574	-3.0812	7.38e-16	STAT5A
AF357399	0.232369	102.888	0.232369	157.47	259.988	0.232369	1.13703	2.46e-10	-9.94142	4.96e-44	-11.0784	1.04e-81	STAT5A
Ccdc69	15.1103	28.3673	14.2083	17.6681	26.7824	18.9335	0.662408	0.0473241	-0.108174	0.771678	-0.770582	0.0208403	STAT5A
Cic	15.5976	8.85183	24.3966	22.1427	13.8565	24.378	-0.791899	0.0431087	0.227151	0.495421	1.01905	0.00623456	STAT5A
Coro2a	46.9649	104.24	38.596	40.6774	47.7001	44.7045	0.715469	0.00144194	-0.175499	0.482245	-0.890968	8.23e-05	STAT5A
Ctse	48.5815	103.776	8.6673	55.3003	107.621	120.668	0.954428	3.86e-06	0.218029	0.329342	-0.736399	0.000207681	STAT5A
Elmod3	4.27287	1.38302	5.37003	5.754	1.44939	6.01707	-2.30047	0.0134145	0.0280735	0.96454	2.32854	0.0107841	STAT5A
Gm11127	87.4567	155.47	42.5613	41.5831	108.544	109.411	0.9601	6.49e-07	0.130358	0.533757	-0.829742	9.73e-06	STAT5A
Gm8369	13.5815	8.61522	23.622	18.5364	9.24859	19.1891	-0.940016	0.0277715	0.271361	0.440742	1.21138	0.00268332	STAT5A
Gpr83	129.927	86.5785	129.538	67.3915	47.2683	96.4005	-0.627565	0.00166914	0.087518	0.634598	0.715083	0.000259791	STAT5A
H2-M2	7.69526	15.0705	0.39882	0.655511	9.18899	7.82236	1.32766	0.0141309	-0.273145	0.694997	-1.60081	0.00386369	STAT5A
H2-Q10	92.1836	162.254	34.3749	32.0799	107.054	98.9597	1.04404	7.13e-08	-0.00509078	0.98116	-1.04913	4.14e-08	STAT5A
H2-Q6	404.175	574.123	244.574	283.922	555.563	459.584	0.64347	3.2e-06	-0.0695305	0.624446	-0.713001	2.36e-07	STAT5A
Htatip2	4.32484	8.19552	0.232369	4.82538	7.38588	5.52453	0.655643	0.2766	-0.678159	0.362231	-1.3338	0.0435096	STAT5A
Isoc2b	7.9134	0.94134	11.9175	12.0789	5.4072	11.1489	-1.78061	0.00392706	0.091828	0.83941	1.87243	0.00179199	STAT5A
Lgals3	1.33277	0.23312	3.97023	1.17885	0.232513	1.45126	-3.7569	0.0904406	1.15066	0.2946	4.90756	0.00931226	STAT5A
Lgals6	3.02115	0.232712	2.52098	2.53415	0.232486	2.8656	-5.26891	0.00344175	-0.106136	0.896873	5.16277	0.00441344	STAT5A
Plac8	5.11119	0.423244	2.17547	9.08296	2.40578	9.87186	-2.77939	0.0012084	-0.326703	0.567607	2.45268	0.006125	STAT5A
Ramp1	18.6451	27.5383	14.2563	17.3128	40.8594	27.8599	0.863687	0.00573676	0.113703	0.743131	-0.749985	0.0129797	STAT5A
Rnase4	5.09078	8.42139	5.12789	4.36348	8.95557	2.06653	0.83432	0.154169	-0.462152	0.520038	-1.29647	0.0362659	STAT5A
Rorc	1.8092	5.35895	1.91554	2.15208	6.78297	0.926271	1.4765	0.0543895	-0.500111	0.634269	-1.97661	0.0153497	STAT5A
Smc6	42.6062	125.994	40.6897	34.1404	117.502	31.3295	1.5899	1.14e-13	-0.206029	0.43546	-1.79593	1.06e-16	STAT5A
Stat5a	19.4412	3.78468	21.5168	26.2943	4.3579	16.9083	-2.53896	1.17e-07	-0.314511	0.348677	2.22445	7.68e-06	STAT5A
Tdpoz4	0.68147	1.52378	0.432697	1.13867	4.49674	1.37073	1.44191	0.171016	-0.990529	0.51817	-2.43244	0.0442203	STAT5A
Wbp1	3.14484	9.54206	4.61685	8.34219	16.9224	8.81623	1.21162	0.0159005	0.236001	0.686156	-0.975617	0.0394706	STAT5A
Xaf1	11.0498	47.3924	12.8502	11.9009	29.1753	16.1895	1.64558	1.19e-06	0.224122	0.590506	-1.42145	9.36e-06	STAT5A
Zfand2b	10.2214	2.03508	19.4685	18.0472	0.233225	13.4584	-3.7712	1.99e-07	0.0828111	0.83165	3.85401	4.94e-08	STAT5A
Zfx	10.9229	3.74396	8.54596	3.20672	1.13205	6.87256	-1.52619	0.0292654	0.0824827	0.87748	1.60868	0.0180656	STAT5A
4930470H14Rik	29.2571	32.3651	17.4455	31.1477	46.0451	13.3362	0.30577	0.263671	-1.10486	0.000938886	-1.41063	8.43e-06	STAT5B
A130040M12Rik	713.928	718.88	1575.87	596.294	526.297	973.59	-0.145523	0.270788	0.847585	5.67e-11	0.993108	2.05e-14	STAT5B
Ahnak	68.9439	75.9589	44.8757	47.2578	49.7936	38.1399	0.0471366	0.830557	-0.591435	0.0128193	-0.638572	0.00640913	STAT5B
AI504432	52.9363	46.837	25.0666	34.9816	34.8925	22.3717	-0.173639	0.488923	-1.01149	0.000311398	-0.837854	0.00325234	STAT5B
Anxa2	16.3943	24.2722	41.1657	17.2322	16.6075	33.9509	0.240092	0.499487	1.07137	0.000634977	0.831277	0.00538099	STAT5B
Apol7e	5.36811	0.528311	10.6085	5.36969	8.76689	11.4802	-0.0708551	0.912602	1.01684	0.0591139	1.08769	0.0430926	STAT5B
Arl2bp	33.0227	34.6641	25.4072	29.6149	36.1229	8.62524	0.100196	0.716484	-0.996233	0.00195451	-1.09643	0.000482222	STAT5B
Art2b	53.6334	43.0987	46.9529	47.5027	56.428	16.3196	-0.11493	0.625484	-0.804283	0.00173803	-0.689353	0.0076436	STAT5B
Bmp7	6.29335	8.94669	3.04861	4.89682	5.39091	1.70055	0.272313	0.640983	-1.21857	0.0997015	-1.49089	0.0332573	STAT5B
Cd74	20.2612	15.2148	74.5409	59.1894	70.0221	103.155	0.0337025	0.894644	1.06288	1.99e-06	1.02918	2.96e-06	STAT5B
Cks1b	6.07898	8.97812	18.4256	4.57744	4.50255	10.8747	0.272313	0.640983	1.2768	0.00988397	1.00448	0.0314143	STAT5B
Dnajb13	2.68438	3.53278	1.92924	5.28758	5.64165	1.38028	0.245432	0.718331	-1.47212	0.100153	-1.71756	0.0435712	STAT5B
Fabp5	16.7187	20.2272	41.9422	11.5757	14.4313	33.9309	0.15663	0.68122	1.2758	7.39e-05	1.11917	0.000309391	STAT5B
Gm12505	44.7611	51.5606	93.5582	33.6924	33.6688	58.2517	0.0503301	0.84288	0.832189	0.000285403	0.781859	0.000524346	STAT5B
Gpr56	1.82518	0.237384	2.82658	0.232568	0.233598	1.65617	-3.75692	0.0904395	1.15078	0.29455	4.9077	0.00930986	STAT5B
Gprasp1	19.6413	20.605	8.84865	8.79894	14.63	6.20147	0.238661	0.526177	-1.05187	0.0217275	-1.29053	0.00314025	STAT5B
Hmga1-rs1	21.0864	14.8718	48.9706	26.423	21.7	40.8232	-0.415483	0.216678	0.825724	0.003209	1.24121	2.51e-05	STAT5B
Igfbp4	51.7201	68.2456	95.6585	57.2871	43.9266	109.248	-0.0327471	0.885517	0.801988	9.9e-05	0.834735	4.61e-05	STAT5B
Igsf23	12.9792	15.8381	22.9813	12.0641	16.3578	37.7131	0.282491	0.479703	1.17358	0.000748031	0.891093	0.00673574	STAT5B
Itm2a	53.7832	71.061	130.59	51.784	57.643	67.8042	0.211001	0.344045	0.796214	0.000128955	0.585213	0.00355565	STAT5B
Kcna3	43.2082	37.6855	24.982	45.4007	52.6434	33.2046	-0.0236031	0.923557	-0.708347	0.00837517	-0.684744	0.010351	STAT5B
Lpar6	11.614	15.9121	6.4659	15.429	15.5435	10.04	0.172163	0.661118	-0.856727	0.0620093	-1.02889	0.019937	STAT5B
Malat1	130.811	126.508	83.719	242.072	219.669	142.184	-0.175877	0.273101	-0.828728	1e-06	-0.652851	0.000132798	STAT5B
Masp2	5.31217	5.09739	1.29703	3.75867	4.28044	1.36295	-0.0707264	0.916936	-2.18516	0.0216827	-2.11444	0.0266331	STAT5B
Matk	10.8305	18.2169	7.01645	15.1938	15.492	9.05275	0.27046	0.491813	-0.80273	0.0830077	-1.07319	0.0144997	STAT5B
Mbnl3	12.7031	13.4193	28.1273	9.95376	7.64251	13.8704	-0.201762	0.652338	0.754769	0.0493596	0.956531	0.0145665	STAT5B
Mcm6	26.0253	25.8433	70.6214	24.2551	21.8742	31.0225	-0.130474	0.677624	0.915336	0.00070105	1.04581	0.000121028	STAT5B
Mettl23	47.6949	70.919	30.055	62.0608	35.343	32.6592	-0.125162	0.58522	-0.911021	0.000320823	-0.785859	0.00206968	STAT5B
Mid1	2.20162	1.72798	1.22586	8.87921	8.64679	1.36111	-0.0709119	0.908565	-2.47004	0.0064942	-2.39912	0.00837017	STAT5B
Ncf1	5.31221	8.85593	20.3089	8.78919	10.3756	15.9319	0.364915	0.478016	1.24382	0.00525633	0.878907	0.033944	STAT5B
Ncoa7	25.5646	33.6679	88.9056	17.7734	20.0324	69.0231	0.222663	0.47928	1.73077	1.54e-11	1.50811	8.15e-10	STAT5B
Nqo2	1.30957	1.74348	0.232769	1.9481	0.959724	0.232374	-0.0682718	0.951511	-4.30584	0.0365015	-4.23757	0.0399315	STAT5B
Nt5e	52.0649	69.2342	38.3002	63.3545	38.902	27.614	-0.162296	0.474082	-0.908873	0.000259599	-0.746576	0.00303909	STAT5B
Olfr1033	4.33666	4.10669	10.4205	4.04568	3.2036	7.00614	-0.258976	0.725988	0.964228	0.109461	1.2232	0.0486216	STAT5B
Plagl1	1.55952	1.5509	8.91067	5.55801	5.11352	9.66209	-0.258953	0.726011	1.12346	0.0557446	1.38241	0.0222218	STAT5B
Ralgapa1	8.909	10.3674	6.13093	2.34588	10.7809	0.583999	0.85152	0.109494	-0.747251	0.275445	-1.59877	0.00667957	STAT5B
Riiad1	1.84987	0.564598	0.232369	0.880025	2.12384	0.232369	-0.0682873	0.951501	-4.30585	0.0365009	-4.23757	0.0399316	STAT5B
Serpina3g	16.1754	22.9879	8.0285	26.5618	25.2844	18.682	0.0864421	0.789778	-0.775842	0.0346893	-0.862284	0.0162852	STAT5B
Suv420h2	12.0785	5.7363	9.45272	5.43288	17.1518	1.89124	0.361037	0.44292	-0.728681	0.190907	-1.08972	0.0360218	STAT5B
Sytl1	24.94	32.5096	16.4214	27.2788	24.1024	15.5646	0.0602799	0.840893	-0.806156	0.0175756	-0.866436	0.00931172	STAT5B
Tmem181b-ps	17.2965	20.8481	10.963	12.7777	20.8439	8.10711	0.411489	0.25478	-0.762881	0.0766831	-1.17437	0.00332546	STAT5B
Tmem256	20.3013	29.3972	47.3588	33.4121	23.3921	43.9152	-0.099099	0.7451	0.669168	0.0140897	0.768267	0.00495247	STAT5B
Tnfrsf4	126.849	188.129	343.605	190.772	211.999	315.618	0.259045	0.107478	0.943825	8.82e-10	0.684779	4.97e-06	STAT5B
Uba3	11.9091	19.1325	9.95501	11.02	10.8197	6.48178	0.309389	0.454089	-0.627426	0.187806	-0.936815	0.0367468	STAT5B
Zfp868	8.02702	6.31986	14.6396	7.82783	8.00365	18.6964	-0.261786	0.624436	0.971622	0.0263482	1.23341	0.00617719	STAT5B

## Sheet: Naive CD4 T cell +IL-7
Cell Type	Naïve CD4+ CD44low CD25- cells
Culture Conditions	20 ng/ml mouse IL-7 (18 hours)
Mouse Gene Symbol	Wild Type: Stat5a+/+ Stat5b+/+ (RPKM Replicate 1)	STAT5A-deficient: Stat5a-/- Stat5b+/- (RPKM Replicate 1)	STAT5B-deficient: Stat5a+/- Stat5b-/- (RPKM Replicate 1)	Wild Type: Stat5a+/+ Stat5b+/+ (RPKM Replicate 2)	STAT5A-deficient: Stat5a-/- Stat5b+/- (RPKM Replicate 2)	STAT5B-deficient: Stat5a+/- Stat5b-/- (RPKM Replicate 2)	Wild Type: Stat5a+/+ Stat5b+/+ (RPKM Replicate 3)	STAT5A-deficient: Stat5a-/- Stat5b+/- (RPKM Replicate 3)	STAT5B-deficient: Stat5a+/- Stat5b-/- (RPKM Replicate 3)	Log2 Fold Change (STAT5A-deficient ÷ WT)	p Value (STAT5A-deficient vs WT)	Log2 Fold Change (STAT5B-deficient ÷ WT)	p Value (STAT5B-deficient vs WT)	Log2 Fold Change (STAT5B-deficient ÷ STAT5A-deficient)	p Value (STAT5B-deficient vs STAT5A-deficient)	Paralog Specificity
AA465934	11.2698	44.2505	16.0187	14.0455	37.6126	15.0775	11.247	30.8368	12.9341	1.62609	8.61311e-10	0.295796	0.36939	-1.3303	1.46032e-07	STAT5A
Abcg3	4.98206	2.46704	5.18981	4.58422	0.880016	7.12199	4.30934	1.2059	5.72468	-1.78465	0.0146154	0.366284	0.473921	2.15094	0.00175812	STAT5A
Apol7e	8.15061	13.6211	24.0271	11.3731	1.02013	24.2674	21.2829	1.2145	8.44395	-1.33274	0.00111768	0.490878	0.10603	1.82361	1.34402e-06	STAT5A
Arl5c	50.4277	31.0268	49.7253	57.1366	32.4441	56.0282	40.3095	35.3718	47.1503	-0.603722	0.00239022	0.0653618	0.717294	0.669084	0.000686478	STAT5A
Cd69	6.27516	23.797	11.7076	13.1229	12.8098	6.86045	7.69195	24.4786	13.5226	1.15111	0.000430204	0.295551	0.434103	-0.855563	0.00605983	STAT5A
Ctse	78.476	159.631	175.622	81.8287	151.049	22.6299	74.4733	137.721	88.504	0.920116	5.94988e-12	0.305005	0.0349853	-0.615111	1.72458e-06	STAT5A
Epb4.1l2	9.6746	9.44281	9.41695	12.8851	6.26389	10.5402	8.53984	0.635888	11.1919	-1.01203	0.0189676	-0.0379591	0.917908	0.97407	0.0250051	STAT5A
Folr4	41.8893	15.4758	34.5484	23.8763	13.5118	30.3699	26.2812	12.636	26.2546	-1.14819	1.78712e-05	-0.00875536	0.968837	1.13944	2.16437e-05	STAT5A
Id2	58.172	137.439	81.6223	51.5683	134.802	51.3908	92.3887	121.972	50.13	0.943239	2.0398e-11	-0.135934	0.403801	-1.07917	5.53783e-14	STAT5A
Map7	3.35914	1.59468	3.72666	2.39659	0.635656	2.95351	2.24102	0.311614	2.67705	-1.19722	0.193421	0.511843	0.461428	1.70906	0.0433842	STAT5A
Mib2	8.60175	4.2274	7.30225	9.14036	6.398	9.12147	8.37728	3.42345	12.6823	-1.01035	0.0339804	0.164196	0.676267	1.17454	0.0113809	STAT5A
Msgn1	0.348627	2.92738	0.450717	0.419293	3.66187	0.928781	2.023	4.02716	0.656305	2.3464	0.00969489	0.00694261	0.995847	-2.33946	0.00994832	STAT5A
Nr4a1	3.07902	13.4271	8.8843	13.9558	11.161	6.72775	3.71325	21.3135	9.94746	1.07389	0.00398162	0.313694	0.460271	-0.760197	0.031935	STAT5A
Nsg2	27.049	9.02303	58.4971	58.2621	13.7158	34.7312	31.049	16.3429	32.1313	-1.58752	8.06342e-10	0.115283	0.561204	1.7028	2.04648e-11	STAT5A
Phyhd1	5.25012	1.77664	6.22559	7.48474	3.99084	9.07026	4.87718	2.89592	7.54469	-0.924527	0.108655	0.440016	0.339075	1.36454	0.0108668	STAT5A
Pisd-ps2	28.1321	12.0835	17.3719	19.8491	11.2827	26.0029	21.1779	13.5366	19.0335	-0.915987	0.00187548	-0.14651	0.574808	0.769477	0.0108351	STAT5A
Ppp1r18	18.4651	28.2297	18.9967	0.232369	13.695	21.3282	44.7421	63.2742	12.3677	0.714285	0.00253684	-0.269341	0.332366	-0.983626	7.00785e-05	STAT5A
Rhob	9.61482	45.9496	16.61	14.1187	38.575	14.8846	20.4484	31.0844	9.50225	1.37549	4.52445e-08	-0.0595012	0.851455	-1.43499	1.67223e-08	STAT5A
Smc6	27.3391	93.8048	29.1345	29.1078	103.424	34.1802	61.6145	110.496	26.6801	1.35821	1.52174e-16	-0.382889	0.071655	-1.7411	1.90926e-23	STAT5A
Snhg9	11.5983	3.65415	14.4636	10.2003	3.61908	11.064	5.53724	5.42113	2.38541	-1.11669	0.0170519	-0.0449479	0.908942	1.07174	0.0232115	STAT5A
Tom1l2	7.91615	4.87451	9.71358	8.50874	5.29124	10.0654	7.28552	0.233765	7.86284	-1.26858	0.0141803	0.228434	0.571978	1.49701	0.00266107	STAT5A
Tssc1	15.4557	18.8529	14.8278	15.3493	27.8653	10.1925	13.6288	23.5191	11.2543	0.668637	0.0173849	-0.280927	0.393979	-0.949564	0.00127759	STAT5A
5730408K05Rik	5.56052	7.01883	3.89795	6.63394	9.63606	3.38899	8.04813	8.46513	3.8925	0.230125	0.591555	-0.915226	0.0797842	-1.14535	0.022303	STAT5B
Acvr1c	2.61102	2.61292	0.45796	3.04183	3.30134	1.80065	2.8358	3.55403	1.29038	0.129901	0.842698	-1.52643	0.0789012	-1.65633	0.0507241	STAT5B
Arhgap31	4.36818	9.44374	0.777097	9.03247	0.655559	0.942735	7.28622	6.22272	0.597906	-0.338583	0.483196	-2.6639	0.000201528	-2.32532	0.00214142	STAT5B
Arl2bp	44.2958	47.4918	11.8944	49.4745	50.0844	30.7886	46.3146	54.8434	32.962	0.109123	0.550856	-0.861511	5.27284e-05	-0.970633	3.44393e-06	STAT5B
Art4	2.22636	2.39608	3.97736	3.345	2.45322	5.69725	3.38804	3.82936	7.65474	-0.0194001	0.978198	1.16107	0.0471147	1.18047	0.0434287	STAT5B
Atn1	79.6939	84.1983	38.7231	86.2455	73.1003	30.5592	77.0268	66.2334	35.7584	-0.143471	0.341526	-1.18809	1.53563e-11	-1.04462	5.64339e-09	STAT5B
Atp2b1	31.8252	32.761	16.2697	25.4798	20.2097	14.1119	30.3277	21.4684	14.9514	-0.25304	0.287281	-0.94124	0.000420625	-0.688201	0.0129814	STAT5B
Atp9a	4.11313	3.17468	8.86985	2.59966	2.04207	10.4016	2.33394	2.52696	3.92846	-0.186083	0.787477	1.34498	0.0121107	1.53106	0.00545387	STAT5B
Bcl2	142.65	132.114	79.661	159.403	155.225	95.332	161.994	149.983	91.4932	-0.105908	0.373053	-0.79442	9.29583e-10	-0.688511	1.50746e-07	STAT5B
Dapl1	66.1581	84.0857	29.8658	43.9703	43.879	25.4268	68.453	24.8614	27.6234	-0.238485	0.169039	-1.09225	3.54396e-08	-0.853762	3.0278e-05	STAT5B
Dtx3l	22.0234	23.3279	41.0126	21.1525	21.8169	35.9924	20.6145	18.088	34.4117	-0.0423795	0.872819	0.800169	0.000586617	0.842548	0.000308769	STAT5B
Dusp10	16.8199	19.6667	32.3948	19.8341	17.5923	26.9947	16.971	21.4846	29.4139	0.107658	0.700244	0.710327	0.00535188	0.602669	0.0158451	STAT5B
Fcer1g	0.743625	0.232369	0.465147	0.381827	0.384709	4.9654	0.709611	1.16596	0.765027	-0.910357	0.552376	1.51655	0.146871	2.42691	0.0443586	STAT5B
Fkbp1a	108.209	109.087	67.5624	116.653	111.955	62.7298	108.53	103.985	69.1238	-0.0589185	0.656212	-0.731723	4.65442e-07	-0.672804	4.02122e-06	STAT5B
G0s2	1.6193	2.4195	3.7055	1.55972	2.01826	3.99076	2.6059	0.232369	3.84483	-0.801459	0.352414	0.770998	0.24656	1.57246	0.0381143	STAT5B
Gbp8	20.6466	24.836	67.4748	14.4662	16.9574	38.1048	18.6047	18.7744	43.621	0.155343	0.575597	1.46827	9.62431e-11	1.31293	2.60982e-09	STAT5B
Glipr2	38.4348	42.5645	30.8748	43.8242	43.5565	16.0414	40.6719	36.0796	21.8477	-0.019547	0.920788	-0.825118	0.000225578	-0.805571	0.000318093	STAT5B
Glo1	19.4789	35.624	19.7401	38.0516	56.501	17.004	39.516	22.4739	17.6998	0.226333	0.281646	-0.808944	0.00113195	-1.03528	1.51482e-05	STAT5B
Gm10653	43.428	57.4305	34.8332	47.2074	45.3428	25.5977	44.4423	30.1295	24.1066	-0.0412646	0.828089	-0.648349	0.00196158	-0.607085	0.00386617	STAT5B
Gm14446	5.84197	8.19544	13.8001	2.96142	4.68533	11.5984	3.66236	3.00673	14.9118	0.27649	0.605728	1.65205	0.000110722	1.37556	0.000713574	STAT5B
Gm4759	34.2159	38.6046	62.6452	28.4111	31.4747	43.4817	23.497	26.268	43.8065	0.155422	0.490496	0.825226	5.38064e-05	0.669805	0.000755001	STAT5B
Gm5512	3.28443	1.62751	2.71796	0.35873	0.2329	8.2513	0.247006	0.233368	6.49909	-0.565929	0.64308	2.44622	0.00102827	3.01215	0.00021385	STAT5B
Gngt2	7.11139	9.38188	12.7118	8.04194	10.0852	16.4225	7.5377	7.35073	12.6172	0.156082	0.707296	0.871583	0.018723	0.715501	0.0468159	STAT5B
H2-T23	240.291	302.55	515.309	255.652	281.72	393.703	216.957	260.464	376.543	0.22559	0.0260075	0.857245	7.58478e-19	0.631655	2.39925e-11	STAT5B
H2-T9	58.9653	56.6834	88.421	44.016	37.238	79.1979	40.4922	60.4872	72.2334	0.0863737	0.633847	0.747333	6.49018e-06	0.660959	5.08105e-05	STAT5B
I830012O16Rik	1.95605	2.26155	9.76896	1.45166	1.55183	4.29498	1.55214	1.74447	5.85708	0.235994	0.780971	1.97207	0.00196455	1.73608	0.00442273	STAT5B
Ifi47	159.729	205.295	314.958	168.998	154.964	234.308	162.237	164.87	245.925	0.0765363	0.503585	0.70175	7.68062e-11	0.625213	4.68658e-09	STAT5B
Igtp	145.353	211.009	366.374	148.041	127.038	239.217	115.919	118.868	266.949	0.140037	0.245243	1.09832	1.42755e-23	0.958281	6.08475e-19	STAT5B
Insl3	9.75997	12.573	24.2645	10.056	10.8673	18.05	6.76062	10.1243	16.1465	0.311079	0.407068	1.1057	0.000825494	0.794621	0.0111078	STAT5B
Irf1	67.1054	98.8293	171.028	68.9903	81.7067	128.423	61.8327	77.2797	130.82	0.36182	0.0178088	1.12509	6.07842e-16	0.763268	7.6625e-09	STAT5B
Irgm2	27.035	36.7661	76.7574	29.746	23.9618	55.6171	24.3666	24.1836	64.0345	0.0496337	0.832166	1.28776	4.00748e-11	1.23813	1.35882e-10	STAT5B
Jak3	15.9162	20.49	32.9114	12.8283	15.0462	26.9243	9.78084	15.2293	21.5645	0.337305	0.282419	1.07617	0.000119144	0.738866	0.00509642	STAT5B
Lgals3bp	15.2902	18.9121	30.0434	12.6184	13.0861	20.8919	13.278	10.8613	22.7656	0.0486624	0.879612	0.856584	0.00247291	0.807922	0.00388068	STAT5B
Litaf	2.07472	1.36667	3.78029	0.816465	1.79731	4.04061	1.59124	2.63001	6.73155	0.235988	0.780975	1.56115	0.0222504	1.32516	0.0426737	STAT5B
Ly6c2	33.9214	69.6072	195.888	8.49667	1.45158	60.3183	31.396	1.93051	53.9192	-0.0209534	0.932751	2.08801	2.06382e-30	2.10897	4.94069e-31	STAT5B
Matk	9.45904	9.64099	22.3361	8.54795	11.1494	17.8089	7.87962	9.72074	18.7685	0.232619	0.547824	1.18449	0.00036433	0.951873	0.00280815	STAT5B
Mri1	13.9293	18.1245	6.69837	13.2278	12.5716	5.44769	17.7222	9.82099	6.39261	-0.15356	0.628995	-1.30664	0.000731551	-1.15308	0.00356678	STAT5B
Ms4a6d	37.2486	57.4173	39.3693	31.9891	45.3733	13.4421	33.219	39.5946	12.1384	0.456768	0.0214401	-0.664294	0.0051087	-1.12106	3.75236e-07	STAT5B
Mtmr3	61.5714	53.377	32.0536	58.8648	66.9592	33.2601	58.6293	55.0362	32.4902	-0.0601905	0.720507	-0.883362	3.7259e-06	-0.823172	1.83236e-05	STAT5B
Myb	2.54111	1.73801	4.14079	2.61241	1.73589	5.44939	1.14343	3.68596	10.9569	0.169055	0.817545	1.50027	0.0108052	1.33122	0.019489	STAT5B
Myc	40.0421	28.5528	18.9137	31.1589	27.4352	13.6264	37.2768	32.3232	14.1502	-0.314993	0.14814	-1.19027	2.23358e-06	-0.875279	0.000897764	STAT5B
Nabp1	46.7433	38.8931	24.1858	41.3346	43.6895	23.8789	46.442	35.5944	18.0272	-0.190816	0.326163	-1.01262	4.97546e-06	-0.821809	0.000307247	STAT5B
Osm	16.8112	15.9481	9.16862	15.5526	16.9852	7.63615	17.8855	14.4192	8.31365	-0.13715	0.646284	-1.01631	0.00342119	-0.87916	0.0130272	STAT5B
Parp14	25.0544	25.9552	40.5482	24.5697	22.5264	32.452	23.823	25.0434	37.9033	-0.0197981	0.936047	0.591295	0.00863892	0.611093	0.00663688	STAT5B
Parp9	13.1319	17.7752	34.5482	12.2788	14.0137	27.4222	12.6943	14.0142	27.1572	0.254757	0.428815	1.23149	8.22174e-06	0.976732	0.000215575	STAT5B
Pgpep1l	25.8713	25.6345	15.3249	24.2661	16.6252	11.0463	34.3486	28.7341	14.4301	-0.242016	0.315679	-1.05994	0.000126867	-0.817927	0.00432192	STAT5B
Pkp4	9.3072	10.7441	4.80531	10.4605	7.95745	3.82167	6.65901	4.9933	3.17132	-0.134315	0.744063	-1.09743	0.023959	-0.963112	0.0519982	STAT5B
Psmb9	87.1779	132.531	208.239	93.8419	104.493	144.795	89.4915	85.9538	139.369	0.238768	0.0831564	0.871838	1.03283e-11	0.63307	3.32918e-07	STAT5B
Pydc3	21.5821	17.5831	36.9113	22.6883	16.871	55.7976	23.6962	17.1381	59.1639	-0.426689	0.116732	1.14551	8.15695e-08	1.57219	5.0203e-12	STAT5B
Qpct	2.52714	1.71528	0.324535	3.34897	2.54452	0.491624	3.41317	3.12793	1.72784	-0.186041	0.787523	-2.07419	0.0292438	-1.88815	0.0537096	STAT5B
Rabgap1l	26.6607	30.7546	14.3591	53.3745	39.6865	21.6721	22.523	33.9737	20.186	0.00873518	0.96708	-0.868906	0.000372162	-0.877641	0.000307063	STAT5B
Ralgds	5.00884	5.46991	1.15576	6.24945	5.17036	2.10956	7.24103	7.9242	1.77045	-0.0196461	0.967454	-1.80678	0.00572547	-1.78714	0.00630731	STAT5B
Samd9l	36.0329	37.0813	50.9659	35.7887	35.28	56.1334	40.1954	38.5248	68.1687	-0.0327876	0.873055	0.650878	0.000468679	0.683666	0.000244554	STAT5B
Sgms1	8.48565	11.5594	23.6796	6.73668	7.89871	19.0016	9.05255	7.51169	15.9022	0.201227	0.618623	1.29906	0.000125207	1.09784	0.000768076	STAT5B
Slfn8	14.7969	12.7851	31.5883	15.1599	10.0525	23.2478	16.0261	12.879	24.7539	-0.371978	0.253937	0.80347	0.00298403	1.17545	4.07953e-05	STAT5B
Slpi	3.16831	4.13186	2.9452	2.30233	1.6218	6.20444	3.29541	0.863106	9.85057	-0.207821	0.77668	1.2384	0.0319365	1.44622	0.0151591	STAT5B
Sp140	11.1456	12.4924	19.9824	10.3734	11.4418	16.0422	12.1909	14.013	20.024	0.144486	0.680199	0.767423	0.0157607	0.622937	0.0439907	STAT5B
St3gal4	18.923	16.9652	10.2216	18.7113	15.4863	10.3792	18.3973	15.6191	8.74919	-0.241435	0.406611	-0.937957	0.00422351	-0.696523	0.0405133	STAT5B
Stat2	16.6125	18.6197	33.3123	14.9533	15.2867	22.73	15.4874	16.8986	27.7947	0.0976091	0.743978	0.842807	0.00154765	0.745198	0.00432259	STAT5B
Tdgf1	0.67938	1.36796	4.08127	1.37445	1.13555	5.00089	0.609628	1.40088	2.45253	-0.0187496	0.986616	1.82568	0.0274272	1.84443	0.025735	STAT5B
Tlr12	2.63737	3.49108	7.09115	3.06539	4.06316	7.10579	3.33291	2.87259	7.41998	0.129938	0.842654	1.21482	0.0266207	1.08488	0.0422137	STAT5B
Tmie	11.7895	16.0985	29.8125	20.5312	15.0687	29.2999	13.0649	23.7697	29.552	0.237304	0.421382	0.95738	0.000288488	0.720076	0.00446401	STAT5B
Tnfrsf18	189.519	168.165	61.2367	165.009	134.858	42.5419	141.467	130.607	52.5139	-0.212713	0.0708783	-1.65147	3.9263e-31	-1.43876	5.0587e-23	STAT5B
Tnip1	34.1858	61.9987	23.5312	37.5722	44.5848	23.4928	32.3021	40.3218	21.2945	0.47883	0.0147022	-0.604227	0.00949127	-1.08306	5.31297e-07	STAT5B
Tnks2	77.0022	66.6891	42.9935	85.8004	77.2967	48.4013	80.7385	72.7557	47.2667	-0.188579	0.213318	-0.813718	9.95056e-07	-0.625139	0.000241241	STAT5B
Trim21	11.714	12.2832	22.2131	10.7646	13.1162	19.2772	12.3422	14.3605	22.4565	0.135676	0.691038	0.852415	0.00518476	0.716738	0.0158679	STAT5B
Trmt1	12.0122	20.1936	7.62058	13.8326	11.4703	6.37756	13.8247	15.4621	3.23817	0.181036	0.56926	-1.21906	0.00250767	-1.40009	0.000334906	STAT5B
Tspan9	1.3537	1.40454	2.99785	3.08244	1.21618	3.75204	2.31129	2.36533	5.20049	-0.584621	0.512935	0.987924	0.152285	1.57255	0.0381032	STAT5B
Tubb2b	9.95091	6.9912	12.8661	13.3124	11.0317	21.3822	4.58347	7.75725	9.92586	-0.125736	0.751157	0.656566	0.0605472	0.782302	0.0279702	STAT5B
Uba7	28.5032	33.8789	53.646	24.4968	24.7542	36.5283	24.6429	23.3384	35.0453	0.0521017	0.826828	0.697699	0.00126116	0.645597	0.00254086	STAT5B
Unc45a	29.3521	28.8882	67.3822	27.7862	46.8467	46.7551	27.4228	26.4985	41.6426	0.260243	0.243155	0.898744	9.7084e-06	0.638502	0.00103072	STAT5B
Zfp760	2.50725	6.86195	2.19168	5.53472	8.52815	2.44758	5.59285	2.26966	2.80001	0.240955	0.631989	-1.07417	0.0886728	-1.31513	0.0295162	STAT5B

## Sheet: Effector CD4 T cell +IL-2
Cell Type	Naïve CD4+ CD44low CD25- cells
Culture Conditions	anti-CD3/CD28 +100 U/ml human IL-2 (72 hours)
Mouse Gene Symbol	Wild Type: Stat5a+/+ Stat5b+/+ (RPKM Replicate 1)	STAT5A-deficient: Stat5a-/- Stat5b+/- (RPKM Replicate 1)	STAT5B-deficient: Stat5a+/- Stat5b-/- (RPKM Replicate 1)	Wild Type: Stat5a+/+ Stat5b+/+ (RPKM Replicate 2)	STAT5A-deficient: Stat5a-/- Stat5b+/- (RPKM Replicate 2)	STAT5B-deficient: Stat5a+/- Stat5b-/- (RPKM Replicate 2)	Log2 Fold Change (STAT5A-deficient ÷ WT)	p Value (STAT5A-deficient vs WT)	Log2 Fold Change (STAT5B-deficient ÷ WT)	p Value (STAT5B-deficient vs WT)	Log2 Fold Change (STAT5B-deficient ÷ STAT5A-deficient)	p Value (STAT5B-deficient vs STAT5A-deficient)	Paralog Specificity
5730408K05Rik	16.3881	27.8017	22.3119	18.0658	33.0424	17.7936	0.847708	0.0101875	0.211008	0.557749	-0.6367	0.0457433	STAT5A
AA465934	10.8843	110.582	12.0346	8.37512	106.373	12.4904	3.50329	5.69977e-32	0.311668	0.496008	-3.19162	2.26193e-29	STAT5A
Atox1	121.884	208.017	116.199	117.737	189.545	152.187	0.733734	3.59615e-05	0.134762	0.466161	-0.598972	0.000630315	STAT5A
Atp10d	2.87744	8.97767	0.453162	4.23031	9.47956	4.94333	1.34964	0.0281321	-0.494713	0.549139	-1.84435	0.00544804	STAT5A
Atp7a	1.68255	2.34613	1.21801	0.452253	4.73456	0.45177	2.62689	0.0250964	-0.0195396	0.991094	-2.64643	0.0237698	STAT5A
Bckdhb	15.0406	33.3824	16.6453	15.2644	26.756	19.8598	1.00393	0.00315215	0.23863	0.528152	-0.765301	0.0192359	STAT5A
Ctla2a	4.77612	3.68352	4.20245	1.70089	0.451306	6.16263	-0.954295	0.321035	0.698578	0.338383	1.65287	0.0534412	STAT5A
Ctse	20.1644	40.6307	3.41694	20.8909	50.9686	25.5688	1.1544	8.49672e-05	-0.57207	0.125504	-1.72647	5.69869e-08	STAT5A
Galnt6	21.7421	8.45407	11.8205	11.1049	0.858659	17.3509	-1.84763	0.000261325	-0.208739	0.590833	1.63889	0.00166451	STAT5A
Gm10845	17.3658	40.8511	20.811	19.2554	40.6398	26.4021	1.174	0.000141065	0.359984	0.29503	-0.81402	0.0052753	STAT5A
Gm19757	7.16894	18.0369	9.21718	8.34834	16.2952	8.97969	1.17948	0.00834406	0.237748	0.644701	-0.941733	0.0280967	STAT5A
Hpcal1	33.243	16.6975	34.0397	29.2763	21.3148	38.9093	-0.734722	0.0229529	0.211861	0.451969	0.946583	0.00249333	STAT5A
Isoc2b	9.822	1.61446	7.41515	5.81834	1.94677	11.4758	-2.34502	0.00222702	0.145194	0.775008	2.49021	0.000853338	STAT5A
Mnda	2.56192	1.09636	3.71565	6.02655	1.10964	7.62535	-1.90738	0.0528728	0.293241	0.66744	2.20063	0.0187728	STAT5A
Mndal	19.3748	10.89	19.8623	24.7077	11.8904	23.5072	-0.890205	0.0211635	-0.0229284	0.945797	0.867277	0.0247719	STAT5A
Mxra8	1.89915	2.9857	0.688321	1.10872	3.09001	1.21016	0.969132	0.313414	-1.46076	0.30097	-2.42989	0.045089	STAT5A
Stag3	0.825114	3.28725	0.919099	0.764488	6.19542	1.07257	2.08865	0.0292696	-0.0211302	0.98739	-2.10978	0.0274648	STAT5A
Tmem194b	3.49606	4.81441	3.39493	2.19797	10.6326	1.72482	1.56109	0.0242444	-0.0220775	0.980258	-1.58317	0.0221915	STAT5A
AI506816	54.1752	54.8605	24.1171	66.5356	47.2199	42.0588	-0.226018	0.336528	-0.884828	0.000507108	-0.65881	0.0118149	STAT5B
Arc	11.792	22.7513	8.62565	5.47407	3.29131	2.2723	0.616499	0.181245	-0.777878	0.174817	-1.39438	0.00737653	STAT5B
Arl2bp	29.0026	27.7448	16.2291	27.686	33.7641	17.4729	0.153875	0.603909	-0.782848	0.0204502	-0.936723	0.00463522	STAT5B
Ccl3	56.2706	59.7723	31.6821	86.636	94.0762	47.4457	0.124015	0.562551	-0.886545	0.000220837	-1.01056	2.00327e-05	STAT5B
Cd74	25.5363	19.8334	62.3905	51.9921	40.7163	188.147	-0.351699	0.210134	1.66873	5.87649e-14	2.02043	3.78251e-18	STAT5B
Cd79b	2.29479	1.85654	4.0986	4.208	1.84145	8.11443	-0.558238	0.53552	0.957543	0.171157	1.51578	0.0485909	STAT5B
Fcrl1	2.49576	1.39453	7.55322	3.85932	4.32314	21.7701	-0.247932	0.772116	2.21791	0.000105163	2.46584	3.54253e-05	STAT5B
Glo1	47.8402	59.9703	27.9783	45.9587	26.2325	28.6232	-0.119281	0.636987	-0.768305	0.0050686	-0.649024	0.0198295	STAT5B
Hectd2	2.16202	2.13867	0.451513	1.33938	3.00609	0.451369	0.713763	0.47627	-4.2528	0.0407282	-4.96657	0.00822475	STAT5B
Idi2	11.8259	19.2322	6.65738	3.86225	2.39638	1.65823	0.397007	0.418308	-1.19574	0.0582015	-1.59275	0.0072291	STAT5B
Lad1	73.8197	99.1893	42.6511	35.0576	29.9304	25.8533	0.251977	0.27284	-0.701462	0.00639055	-0.953438	0.000136952	STAT5B
Lgals3	3.64687	1.85466	0.886315	1.85137	4.87188	0.451298	0.479486	0.561663	-2.16695	0.0864067	-2.64643	0.0237698	STAT5B
Ly6d	0.732088	0.559526	2.81343	0.834673	0.838209	7.10865	-0.886864	0.564236	2.20773	0.0183378	3.0946	0.0042104	STAT5B
Mettl23	24.8859	29.2367	9.96989	25.8861	22.0023	13.7839	0.0079598	0.979798	-1.10525	0.00273666	-1.11321	0.00254588	STAT5B
Mzb1	0.84089	1.20215	3.97698	0.850241	0.496029	5.45926	-0.886774	0.564272	2.05866	0.0318329	2.94543	0.00787577	STAT5B
Napsa	1.10681	1.60885	2.30517	0.883134	1.60897	7.62115	0.00710874	0.995761	2.05829	0.0318646	2.05119	0.0325401	STAT5B
Prelid2	114.951	96.3423	58.3046	46.4098	53.8393	27.2688	-0.0938196	0.656545	-0.941528	4.85966e-05	-0.847709	0.000296368	STAT5B
Rbmx	20.1202	27.7552	32.1216	19.3801	11.6215	37.4234	0.00832233	0.981112	0.797309	0.0108324	0.788987	0.0116968	STAT5B
Ska1	5.10969	8.2284	0.873226	4.87272	5.12344	3.4603	0.380796	0.532432	-1.30916	0.101881	-1.68996	0.0248045	STAT5B
Snhg6	167.401	230.638	291.185	200.786	78.4784	320.751	-0.245703	0.157275	0.710354	1.44002e-05	0.956057	1.00874e-08	STAT5B
Snhg9	7.14748	3.03235	15.8141	2.73693	8.14035	23.4045	0.142661	0.821951	1.92245	5.44801e-05	1.77979	0.000134974	STAT5B
Spp1	2.19895	2.29355	4.30885	5.68266	3.42134	15.164	-0.464657	0.573888	1.39571	0.0216168	1.86037	0.00462483	STAT5B
Stat4	56.481	57.8219	28.8968	32.1692	26.4622	20.7211	-0.0585164	0.819791	-0.83596	0.00322138	-0.777444	0.00660132	STAT5B
Trim12c	6.94569	8.08381	4.98148	6.53883	14.7828	3.42952	0.82253	0.102656	-0.711366	0.267912	-1.5339	0.0064611	STAT5B
Trim16	3.77004	10.8807	2.18863	4.29473	5.5721	1.57281	0.993133	0.104844	-1.38854	0.122591	-2.38167	0.00185647	STAT5B
Twist1	5.93662	7.17871	35.0913	21.9242	11.7492	34.3639	-0.547731	0.215655	1.27366	0.00014933	1.82139	6.37296e-07	STAT5B
